# Supplementary material
Source: PubMed Central journal article supplement (PMC5098038)
Supplement: 10.1074_M116.061549_mcp.M116.061549-1.pdf [file 10.1074_M116.061549_mcp.M116.061549-1.pdf]

Supplement to  
“Cysteine S-linked N-acetylglucosamine (S-GlcNAcylation), a new  
post-translational modification in mammals.”

Jason C. Maynard, Alma L Burlingame, Katalin F. Medzihradzky  
Department of Pharmaceutical Chemistry, School of Pharmacy, University of  
California San Francisco, 600 16th Street Genentech Hall, N474A, Box 2240,  
San Francisco, California 94158-2517, United States

# Legend

- We listed the UniProt accession number of the S-GlcNAcylated proteins, their name, the species they were isolated from, the glycopeptide sequence and the sequence position of the modified Cys-residue
- Both the beam-type CID spectrum (HCD) (upper panel) and the ETD data (lower panel) are presented for each S-GlcNAcylated peptide
- In most database searches an unspecified 203-203.1Da modification was permitted on Cys residues – thus, the exact mass of the modification was reported by Protein Prospector and this information is listed in S Table 1. Here the modification is shown according to the final assignment, i.e. GlcNAc. However, in some later searches a user-specified exactly defined modification was introduced: Cgly that stands for a HexNAc on Cys.
- For the O-GlcNAcylated peptides the Prospector output was copied, where “HexNAc’ was assigned as the modification. Since isomeric GalNAc and GlcNAc both may derivatize peptides this generic assignment is used in database searches.
- The measured precursor ion masses were included.
- In the HCD spectra we assigned just enough fragment ions to indicate that the sequence identification is reliable.
- In the ETD spectra we labeled the precursor ion and its charge-reduced forms ( $\clubsuit$ ), it was also indicated (\*) if the charge reduced form of a coeluting ion of different charge in the precursor selection window was detected. The characteristic side-chain loss from the charge-reduced form(s) of the precursor ion is pointed out.
- Protein Prospector output, i.e. the masses used in the database search and their assignments, including the mass measurement error, is presented in the Tables. These assignments were manually implemented to indicate the w ion formation from the Cys-residues.

LDFGQGSGSPVC(GlcNAc)LAQVK

V20141119-37 #7387 RT: 71.74 AV:  
T: FTMS + c NSI d Full ms2 955.47@hc

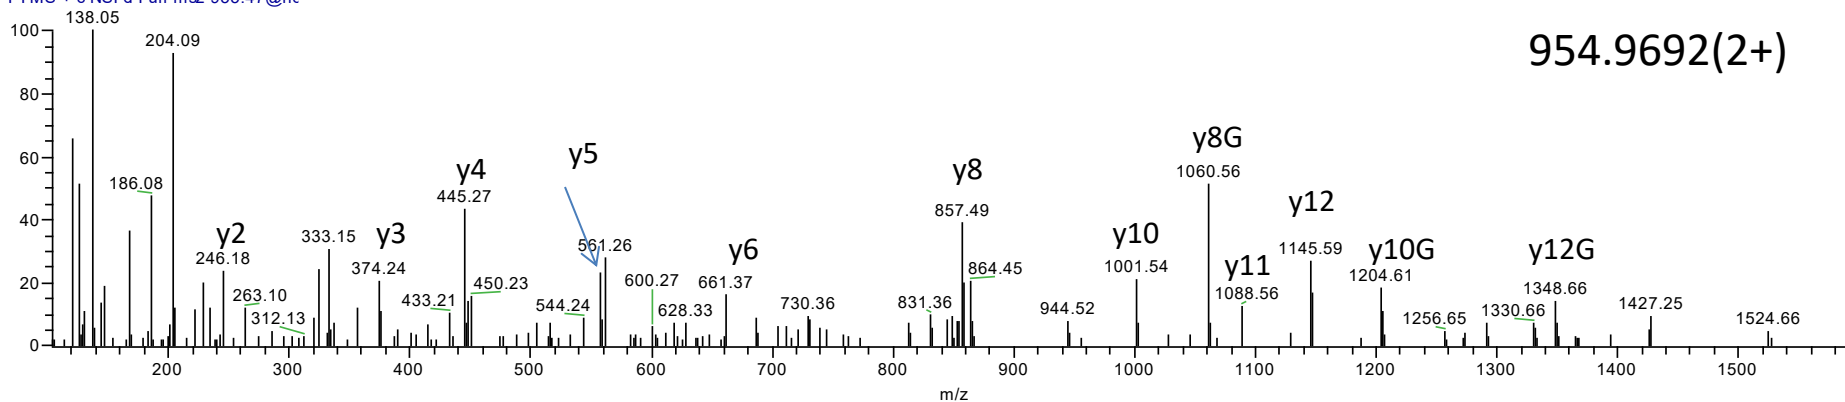

V20141119-37 #7388 RT: 71.76 AV: 1 NL: 1.29E3  
T: ITMS + c NSI d sa Full ms2 955.47@etd100.00 [50.00-1925.00]

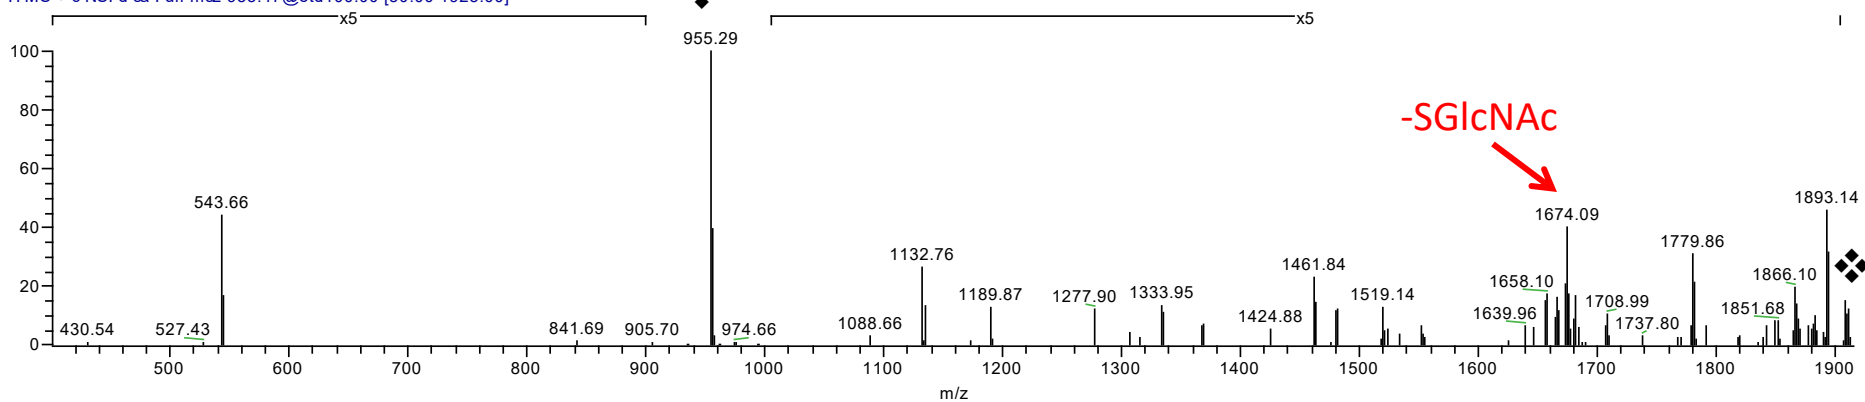

[-] Peak Matches

| 335.3340     | 430.6260      | 543.5050    | 849.8690               | 948.6410    | 956.9750  | 1132.2410               | 1132.9600  | 1275.7680                  | 1276.8060  |
|--------------|---------------|-------------|------------------------|-------------|-----------|-------------------------|------------|----------------------------|------------|
|              | z+14(0.36)    | z+15(0.15)  | z+16(0.44)<br>b9(0.50) | z+17(0.14)  |           | z+19(-0.34)<br>z9(0.66) | z+19(0.37) | z11(0.14)                  | z+11(0.17) |
| 1461.8090    | 1480.6320     | 1519.0390   | 1532.7390              | 1552.7280   | 1656.9390 | 1664.9660               | 1673.0230  | 1680.7850                  | 1688.3240  |
| z+113(0.090) | c-113(-0.048) | z+114(0.30) |                        | c14(0.0029) |           | z15(0.16)               |            | c15(0.0013)<br>y15(-0.035) |            |
| 1690.9060    | 1707.9940     | 1780.9910   |                        |             |           |                         |            |                            |            |
|              |               | z+116(0.15) |                        |             |           |                         |            |                            |            |

# S Figure 1B

## *In vitro* GlcNAcylated LDFGQGSVPVC(GlcNAc)LAQVK

The modified peptide eluted slightly earlier than the unmodified sequence; fragment ions making the site-assignment unambiguous are labeled

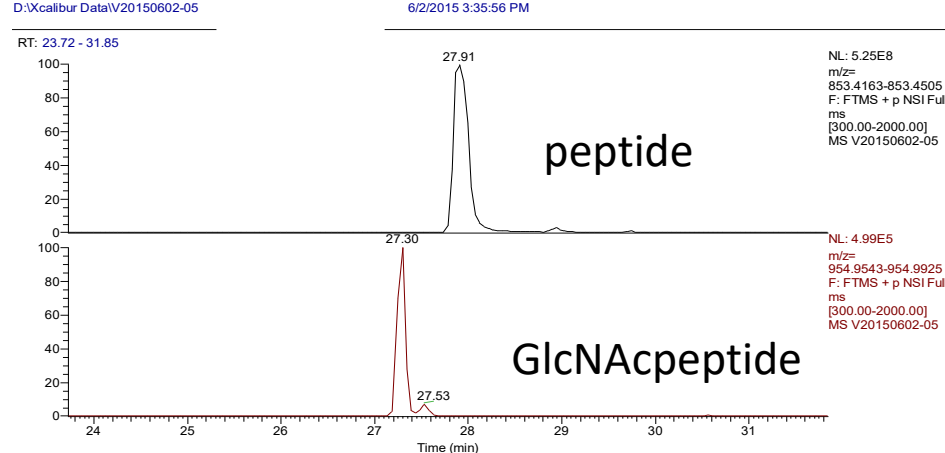

V20150602-05 #2433 RT: 27.27 AV: 1 N  
T: FTMS + c NSI d Full ms2 954.97@hcd30.

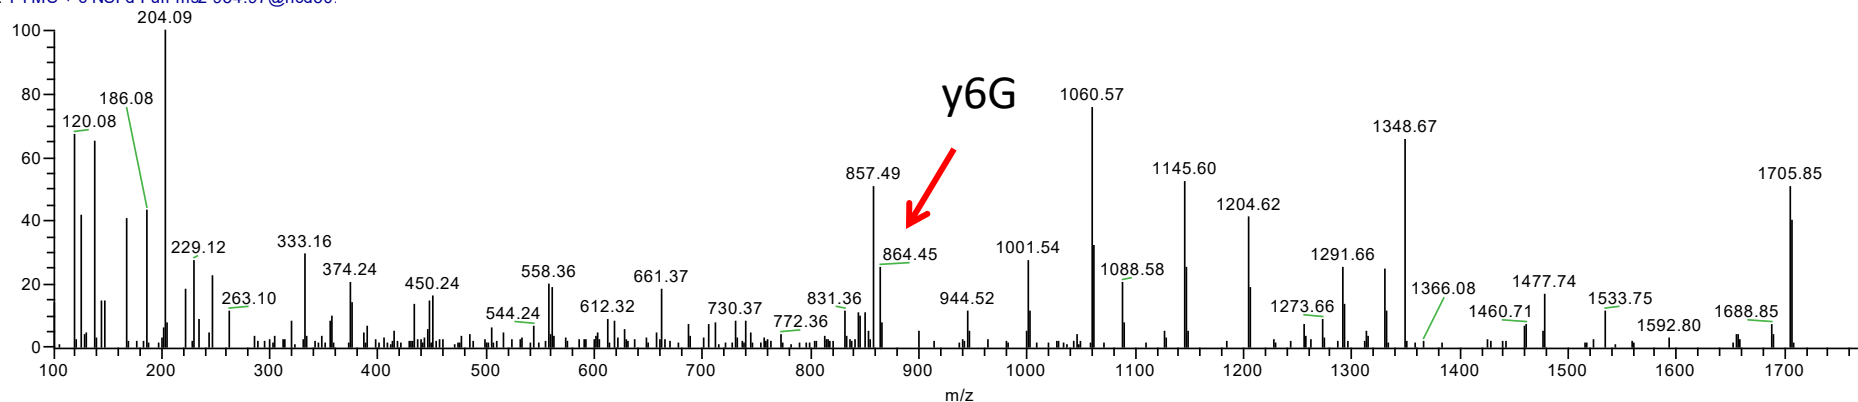

V20150602-05 #2434 RT: 27.28 AV: 1 NL: 4.19E4  
T: ITMS + c NSI d sa Full ms2 954.97@etd100.00 [50.00-1920.00]

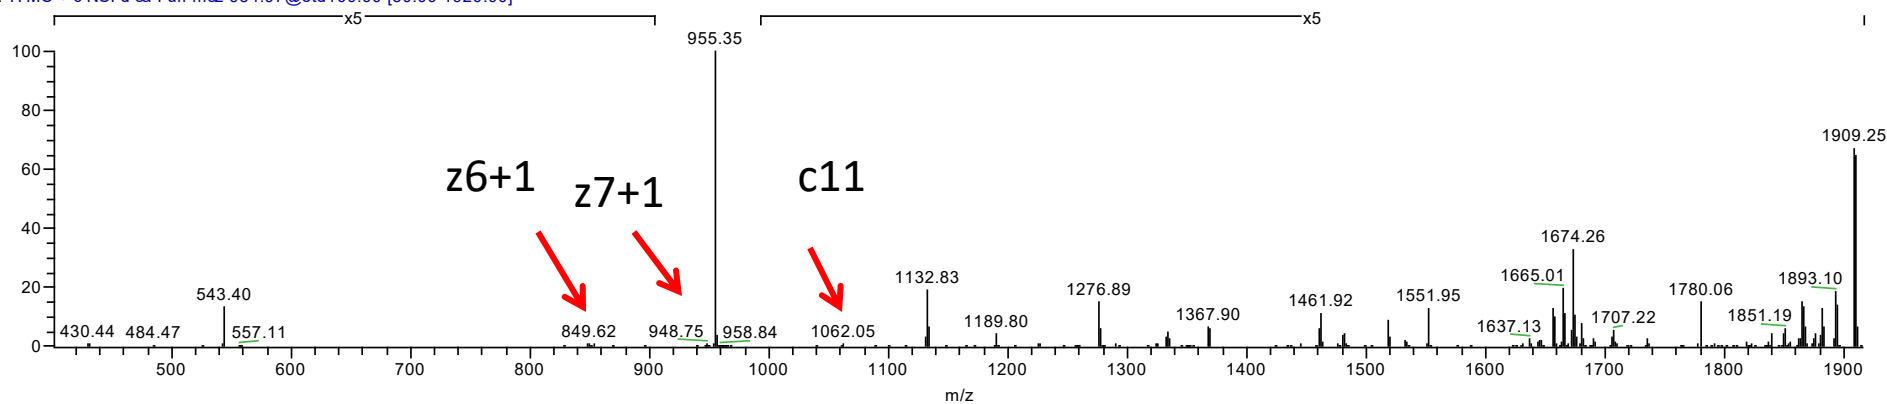

V20141119-40 #5147 RT: 49.81 A'  
T: FTMS + c NSI d Full ms2 752.34@

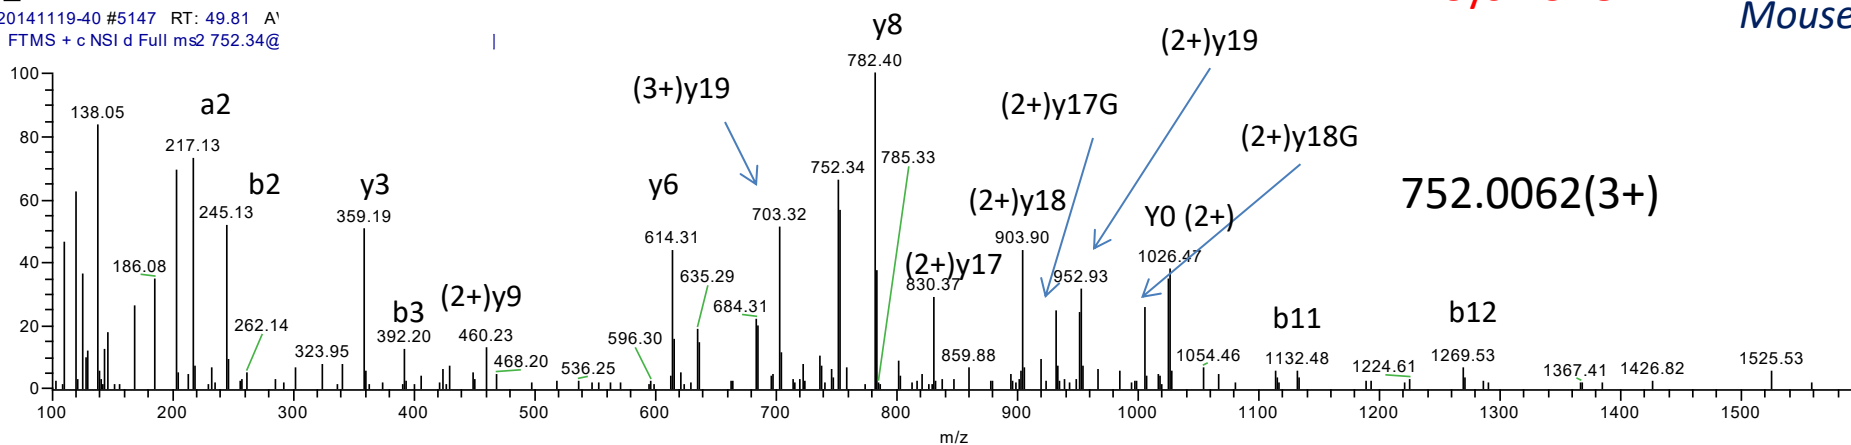

V20141119-40 #5148 RT: 49.82 AV: 1 NL: 2.18E4

T: ITMS + c NSI d sa Full ms2 752.34@etd66.67 [50.00-2000.00]

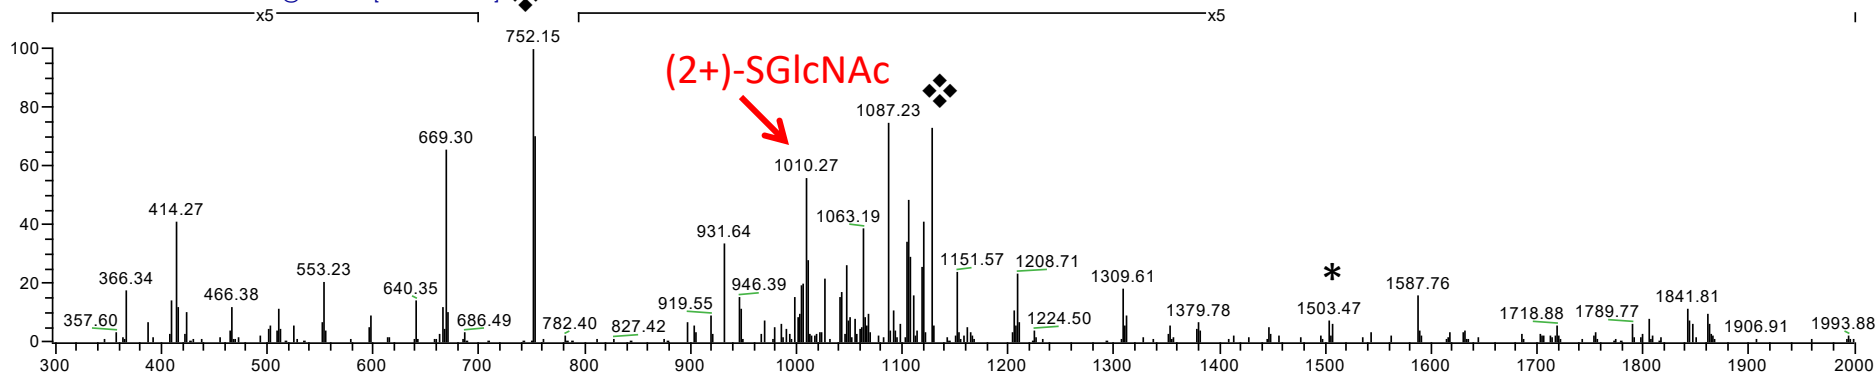

Peak Matches

| 366.3370                  | 387.4930                 | 409.3060                                                 | 414.2670                                                                               | 423.2910                 | 465.1910                  | 466.3790               | 501.2540                 | 509.0700                                               | 510.3430                  |
|---------------------------|--------------------------|----------------------------------------------------------|----------------------------------------------------------------------------------------|--------------------------|---------------------------|------------------------|--------------------------|--------------------------------------------------------|---------------------------|
|                           |                          | c <sub>3</sub> (0.083)                                   | z <sub>4</sub> (0.056)                                                                 |                          | c-1 <sub>4</sub> (-0.046) | c <sub>4</sub> (0.13)  | z <sub>5</sub> (0.011)   |                                                        |                           |
| 525.3170                  | 552.3750                 | 553.2300                                                 | 596.3030                                                                               | 597.3930                 | 640.3470                  | 666.6050               | 669.3020                 | 761.4710                                               | 782.4050                  |
| z <sub>10</sub> +2(-0.44) | c-1 <sub>5</sub> (0.11)  | c <sub>5</sub> (-0.047)                                  |                                                                                        |                          | c <sub>6</sub> (0.038)    |                        | z <sub>7</sub> (-0.031)  |                                                        | y <sub>8</sub> (7.1e-4)   |
| 931.6430                  | 946.3880                 | 997.8630                                                 | 1005.3880                                                                              | 1010.2670                | 1026.5580                 | 1041.2670              | 1047.5250                | 1063.1870                                              | 1087.2280                 |
| y <sub>17</sub> +2(-0.27) | c <sub>7</sub> (-0.0014) | z+1 <sub>18</sub> +2(-0.077)<br>z <sub>18</sub> +2(0.43) | y <sub>18</sub> +2(-0.057)<br>c <sub>18</sub> +2(-0.065)<br>c-1 <sub>18</sub> +2(0.44) |                          |                           |                        | c <sub>8</sub> (0.088)   | c <sub>19</sub> +2(0.22)<br>c-1 <sub>19</sub> +2(0.72) | b <sub>9</sub> (-0.20)    |
| 1104.4660                 | 1107.5970                | 1111.2260                                                | 1120.9960                                                                              | 1151.5700                | 1205.6510                 | 1208.7050              | 1309.6100                | 1586.7850                                              | 1841.8050                 |
| c <sub>9</sub> (0.0074)   |                          |                                                          |                                                                                        | z <sub>11</sub> (0.0094) | c <sub>10</sub> (0.14)    | z <sub>12</sub> (0.12) | z <sub>13</sub> (-0.020) | c <sub>13</sub> (0.099)                                | c <sub>16</sub> (-0.0032) |



QKAPFPAT(GlcNAc)C(GlcNAc)EAPSR

V20141119-04 #2583 RT: 25.05 AV:  
T: FTMS + c NSI d Full ms2 637.31@h

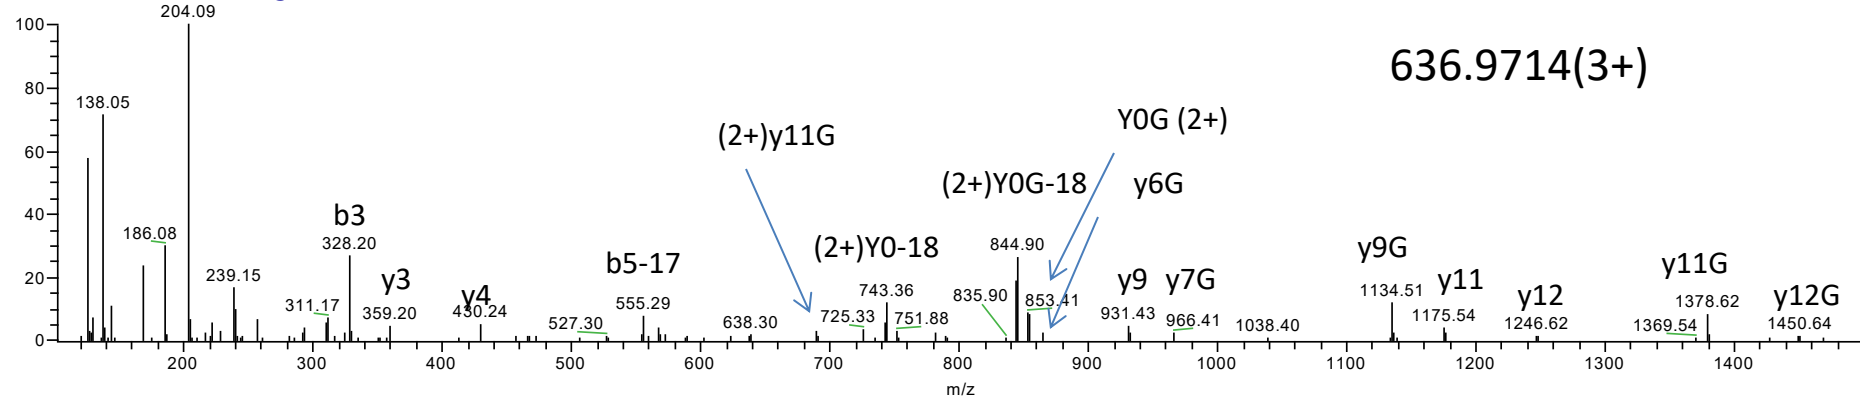

V20141119-04 #2584 RT: 25.06 AV: 1 NL: 1.62  
T: ITMS + c NSI d sa Full ms2 637.31@etd66.67 [5

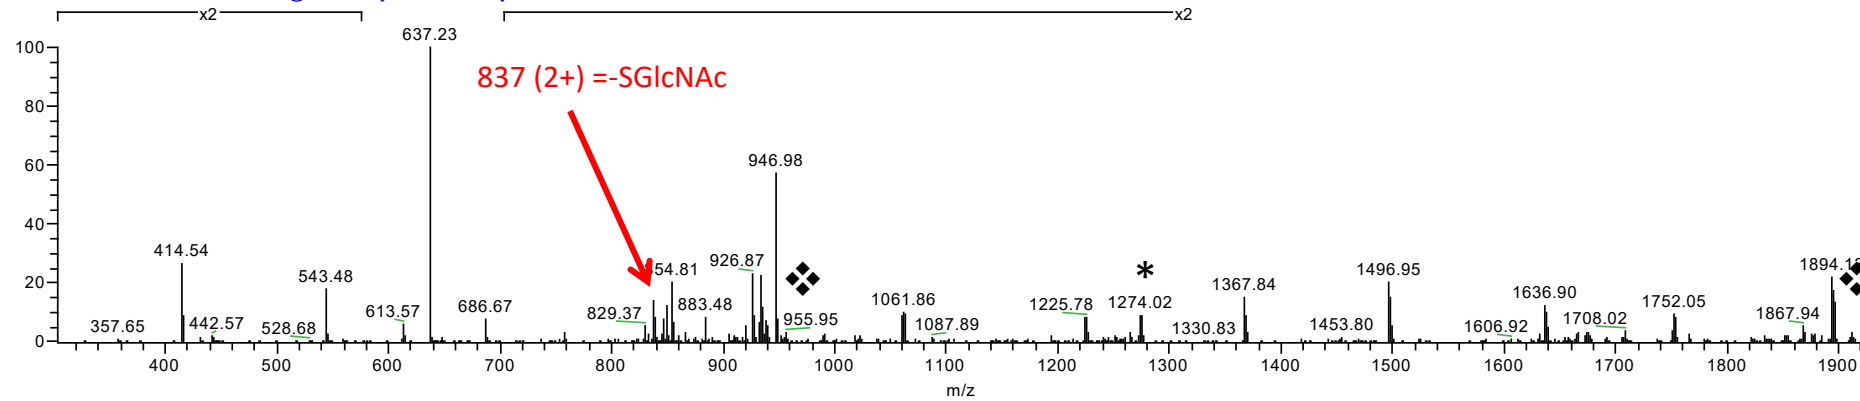

## QKAPFPAT(GlcNAc)C(GlcNAc)EAPSR

## Peak Matches

| 414.5430                                          | 430.6040                                          | 442.5660               | 543.4830                                          | 559.6430                                                                        | 579.5750               | 612.5930  | 613.5750       | 639.1620                                                                        | 647.6000               |
|---------------------------------------------------|---------------------------------------------------|------------------------|---------------------------------------------------|---------------------------------------------------------------------------------|------------------------|-----------|----------------|---------------------------------------------------------------------------------|------------------------|
| z <sub>4</sub> (0.32)<br>z+1 <sub>4</sub> (-0.69) | y <sub>4</sub> (0.36)                             | c <sub>4</sub> (0.29)  | z <sub>5</sub> (0.22)<br>z+1 <sub>5</sub> (-0.79) | y <sub>5</sub> (0.36)                                                           |                        |           | w <sub>6</sub> |                                                                                 |                        |
| 658.6090                                          | 686.6670                                          | 736.1520               | 757.7700                                          | 802.5220                                                                        | 822.7940               | 828.4890  | 829.3730       | 832.9140                                                                        | 837.0300               |
|                                                   | c <sub>6</sub> (0.27)                             |                        | c <sub>7</sub> (0.33)                             |                                                                                 |                        |           |                | c <sub>12</sub> <sup>+2</sup> (0.019)<br>c-1 <sub>12</sub> <sup>+2</sup> (0.52) |                        |
| 837.9480                                          | 846.3930                                          | 849.2250               | 854.0380                                          | 883.4770                                                                        | 920.2940               | 927.7070  | 935.3730       | 938.5850                                                                        | 948.7850               |
|                                                   |                                                   | z <sub>6</sub> (-0.13) |                                                   | z+1 <sub>13</sub> <sup>+2</sup> (0.058)<br>z <sub>13</sub> <sup>+2</sup> (0.56) |                        |           |                |                                                                                 |                        |
| 1060.7300                                         | 1224.7560                                         | 1274.0190              | 1367.8360                                         | 1496.9520                                                                       | 1636.8970              | 1674.0060 | 1708.0170      | 1751.2130                                                                       | 1752.0460              |
| c-1 <sub>8</sub> (0.18)                           | z <sub>8</sub> (0.24)<br>z+1 <sub>8</sub> (-0.77) |                        | c <sub>9</sub> (0.19)                             | c <sub>10</sub> (0.26)                                                          | z <sub>12</sub> (0.17) |           |                | c-1 <sub>13</sub> (0.41)<br>c <sub>13</sub> (-0.60)                             | c <sub>13</sub> (0.23) |



V20141119-08 #2451 RT: 25.79 AV  
T: FTMS + c NSI d Full ms2 569.28@

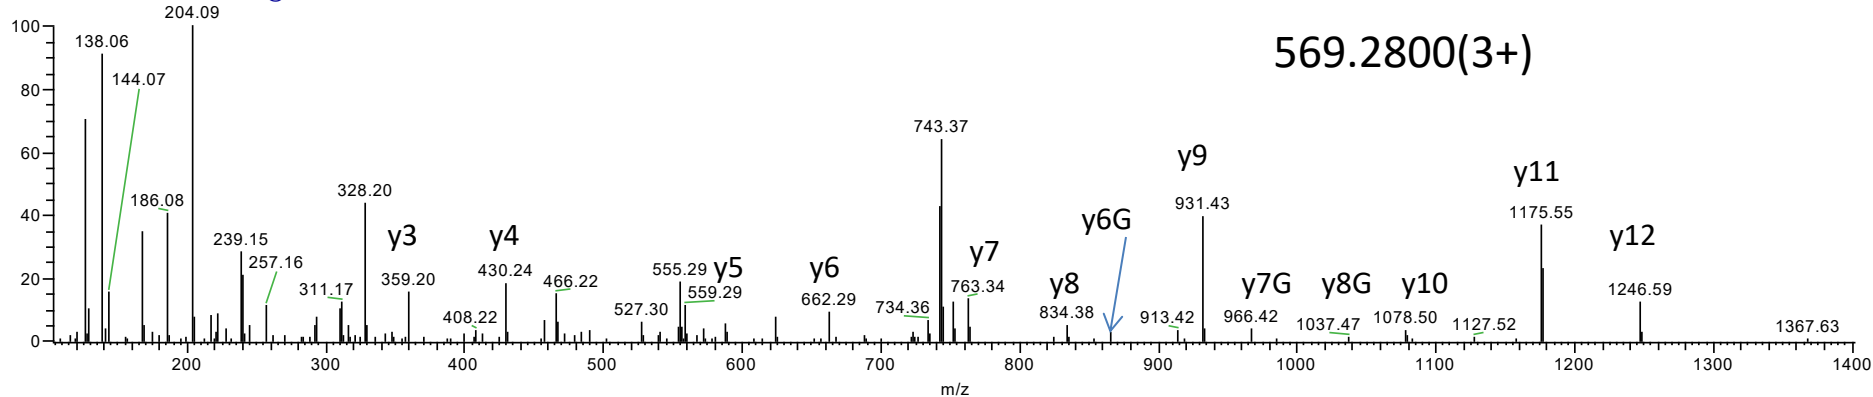

V20141119-08 #2452 RT: 25.80 AV: 1 NL: 1.51E5  
T: ITMS + c NSI d sa Full ms2 569.28@etd66.67 [50.00-1720.00]

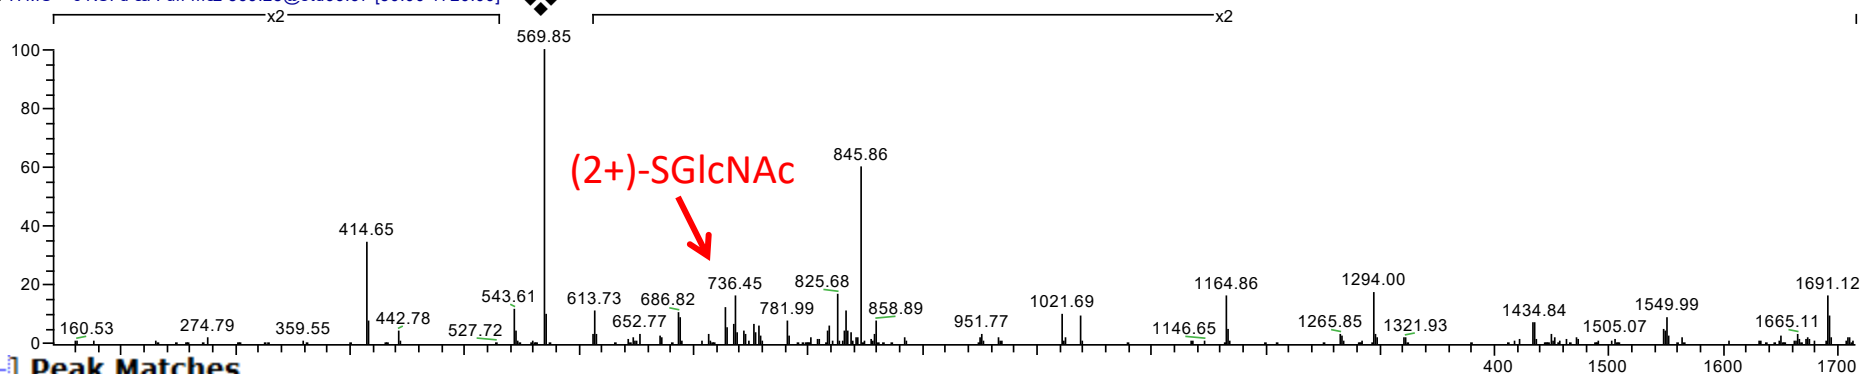

## Peak Matches

| 160.5280                           | 230.5830                                                      | 274.7860                            | 414.6510                                                                   | 442.7810                                                        | 543.6080                                                      | 547.7330               | 559.6500               | 570.6450                                                        | 612.7170                                                      |
|------------------------------------|---------------------------------------------------------------|-------------------------------------|----------------------------------------------------------------------------|-----------------------------------------------------------------|---------------------------------------------------------------|------------------------|------------------------|-----------------------------------------------------------------|---------------------------------------------------------------|
| z <sub>1</sub> <sup>+</sup> (0.42) |                                                               | c <sub>2</sub> (0.60)               | z <sub>4</sub> (0.43)<br>z <sub>14</sub> <sup>-</sup> (-0.58)              | c <sub>4</sub> (0.50)                                           | z <sub>5</sub> (0.34)<br>z <sub>15</sub> <sup>-</sup> (-0.66) |                        | y <sub>5</sub> (0.37)  |                                                                 |                                                               |
| 613.7340                           | 642.8470                                                      | 647.6690                            | 652.7690                                                                   | 670.7010                                                        | 686.8250                                                      | 713.8050               | 728.1750               | 735.5960                                                        | 736.4540                                                      |
| w6                                 |                                                               | c <sub>10</sub> <sup>+</sup> (0.36) |                                                                            |                                                                 | c <sub>6</sub> (0.43)                                         |                        |                        |                                                                 |                                                               |
| 744.3780                           | 752.5620                                                      | 757.8470                            | 781.9940                                                                   | 817.4440                                                        | 826.3750                                                      | 833.9940               | 836.9880               | 846.8170                                                        | 858.1290                                                      |
|                                    |                                                               | c <sub>7</sub> (0.41)               | z <sub>13</sub> <sup>+</sup> (0.11)<br>z <sub>13</sub> <sup>+</sup> (0.62) |                                                                 |                                                               |                        |                        |                                                                 | c <sub>8</sub> <sup>-</sup> (-0.35)<br>c <sub>18</sub> (0.65) |
| 858.8910                           | 1021.6870                                                     | 1037.8730                           | 1164.8590                                                                  | 1265.8490                                                       | 1294.0020                                                     | 1433.8440              | 1450.0330              | 1548.2830                                                       | 1549.9860                                                     |
| c <sub>8</sub> (0.41)              | z <sub>8</sub> (0.24)<br>z <sub>18</sub> <sup>-</sup> (-0.76) | y <sub>8</sub> (0.41)               | c <sub>9</sub> (0.28)                                                      | z <sub>10</sub> (0.29)<br>z <sub>110</sub> <sup>-</sup> (-0.72) | c <sub>10</sub> (0.38)                                        | z <sub>12</sub> (0.19) | y <sub>12</sub> (0.36) | c <sub>13</sub> <sup>-</sup> (-0.46)<br>c <sub>113</sub> (0.55) |                                                               |

AVC(Carbamidomethyl)C(GlcNAc)DMVYKLPFGR

Cys-2870

Mouse

V20141119-53 #5810 RT: 58.03 AV: 1  
T: FTMS + c NSI d Full ms2 621.29@hcr

621.2928(3+)

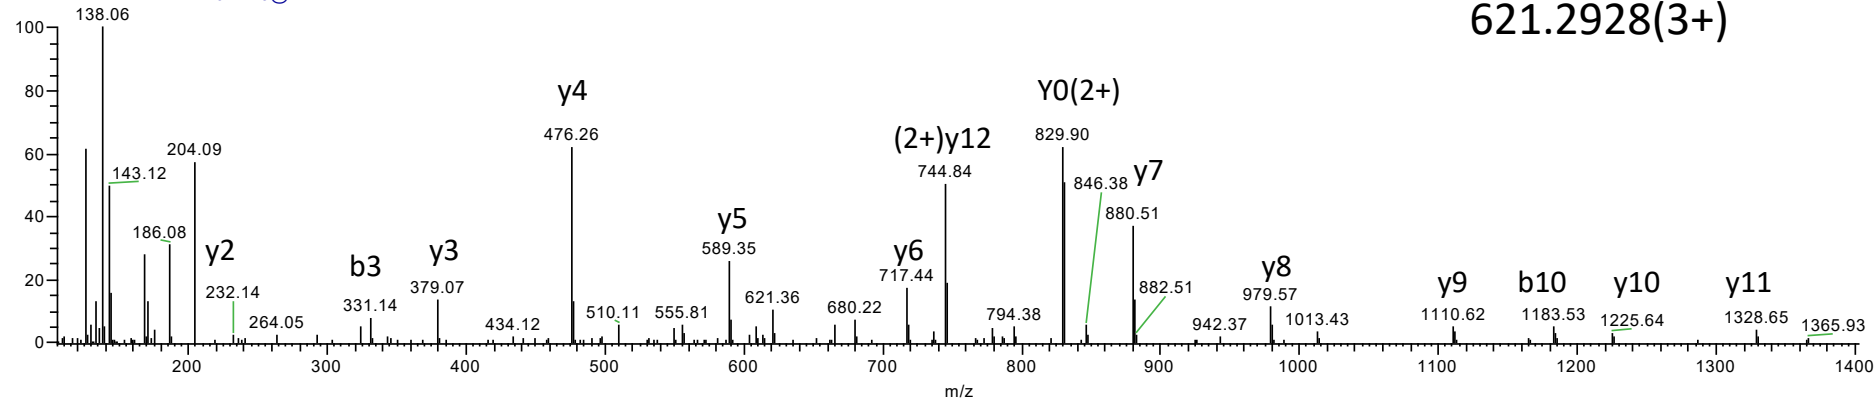

V20141119-53 #5811 RT: 58.04 AV: 1 NL: 1.39E4  
T: ITMS + c NSI d sa Full ms2 621.29@etd66.67 [50.00-1875.00]

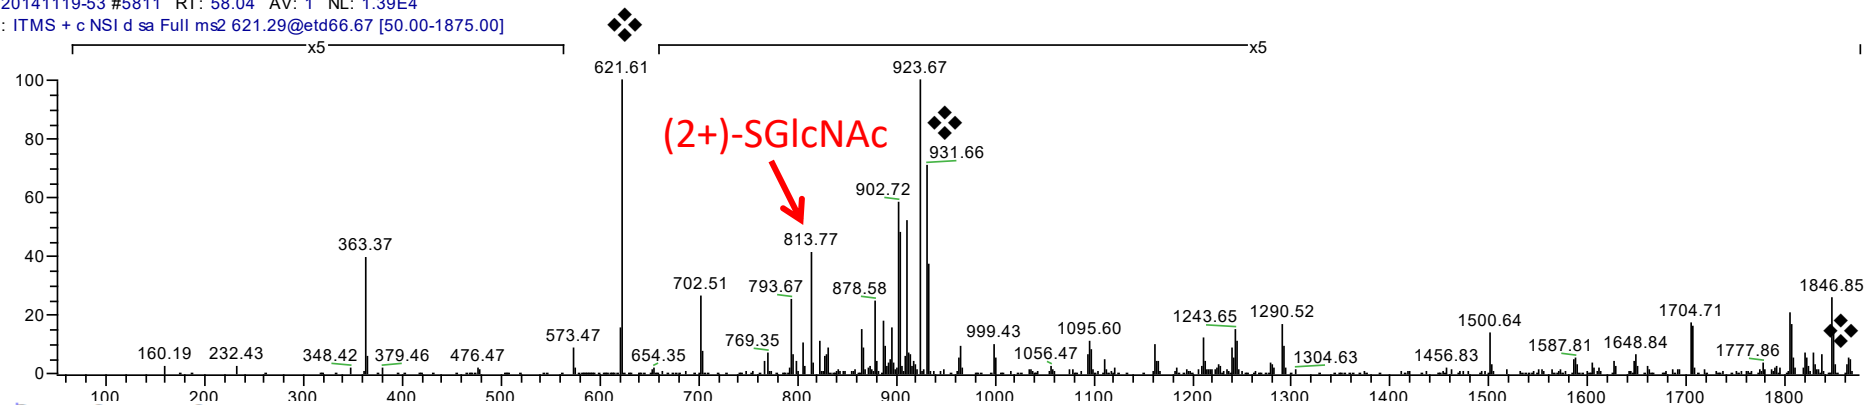

Peak Matches

|                          |                          |                                       |                                      |                                       |                                       |                       |                         |                          |                            |
|--------------------------|--------------------------|---------------------------------------|--------------------------------------|---------------------------------------|---------------------------------------|-----------------------|-------------------------|--------------------------|----------------------------|
| 160.1910                 | 232.4270                 | 348.4180                              | 363.3730                             | 379.4640                              | 476.4730                              | 573.4660              | 622.4480                | 638.9160                 | 653.2450                   |
| z+1 <sub>1</sub> (0.083) | y <sub>2</sub> (0.29)    | c <sub>3</sub> (0.25)                 | z <sub>3</sub> (0.18)                | y <sub>3</sub> (0.26)                 | y <sub>4</sub> (0.21)                 | z <sub>5</sub> (0.14) |                         |                          | c-1 <sub>4</sub> (-0.0051) |
| 701.5450                 | 702.5130                 | 766.2110                              | 767.0860                             | 769.3510                              | 792.0770                              | 793.6700              | 799.4460                | 806.1740                 | 813.7730                   |
| z <sub>6</sub> (0.12)    | z+1 <sub>6</sub> (0.083) | y <sub>11</sub> <sup>+2</sup> (-0.16) | y <sub>11</sub> <sup>+2</sup> (0.72) | c <sub>5</sub> (0.066)                |                                       | w12(2+)               |                         |                          |                            |
| 822.2850                 | 864.6450                 | 865.5570                              | 878.5770                             | 887.1440                              | 895.3800                              | 904.7110              | 912.0240                | 914.7920                 | 964.6050                   |
|                          | z <sub>7</sub> (0.16)    | z+1 <sub>7</sub> (0.064)              |                                      | z <sub>13</sub> <sup>+2</sup> (-0.76) | y <sub>13</sub> <sup>+2</sup> (-0.54) |                       |                         |                          | z+1 <sub>8</sub> (0.044)   |
| 999.4270                 | 1094.6590                | 1095.5980                             | 1162.5580                            | 1210.7750                             | 1240.2630                             | 1243.6510             | 1290.5200               | 1500.6420                | 1704.7100                  |
| c <sub>7</sub> (0.033)   | z <sub>9</sub> (0.065)   | z+1 <sub>9</sub> (-0.0039)            | c <sub>8</sub> (0.10)                | z+1 <sub>10</sub> (0.15)              |                                       |                       | c <sub>9</sub> (-0.032) | c <sub>11</sub> (-0.047) | c <sub>13</sub> (-0.069)   |

## IQTDTC(GlcNAc)HSTVVHSPEVYSVIIR

V20141119-31 #5734 RT: 52.87 AV  
T: FTMS + c NSI d Full ms2 672.84@

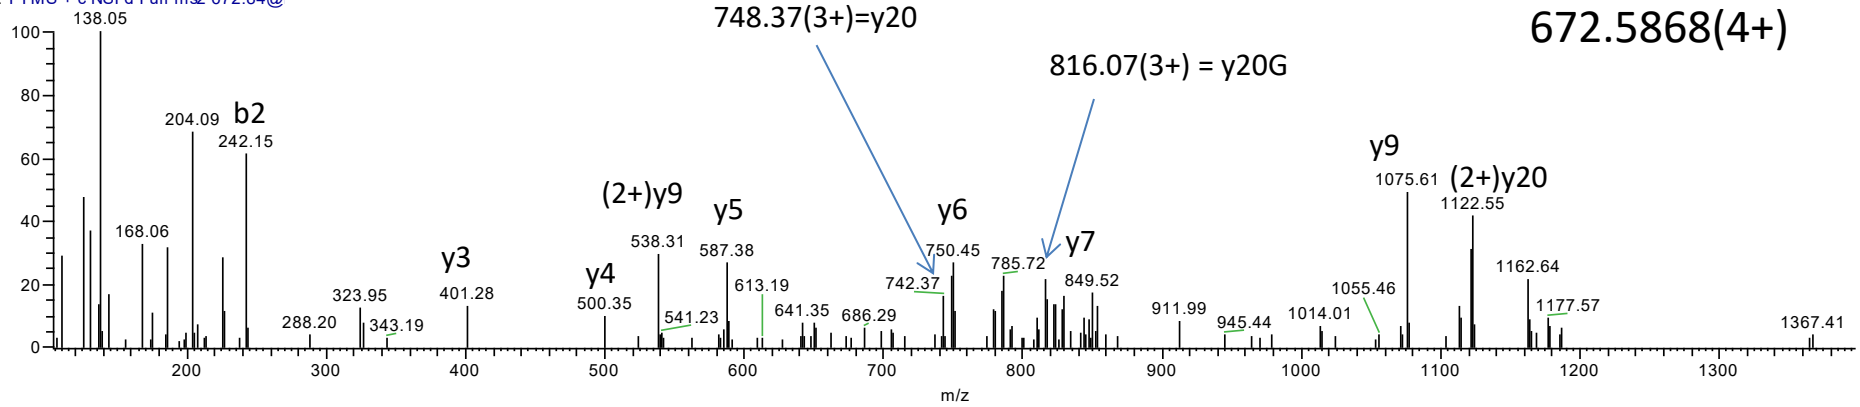

V20141119-31 #5735 RT: 52.87 AV: 1 NL: 5.13E3  
T: ITMS + c NSI d sa Full ms2 672.84@etd50.00 [50.00-2000.00]

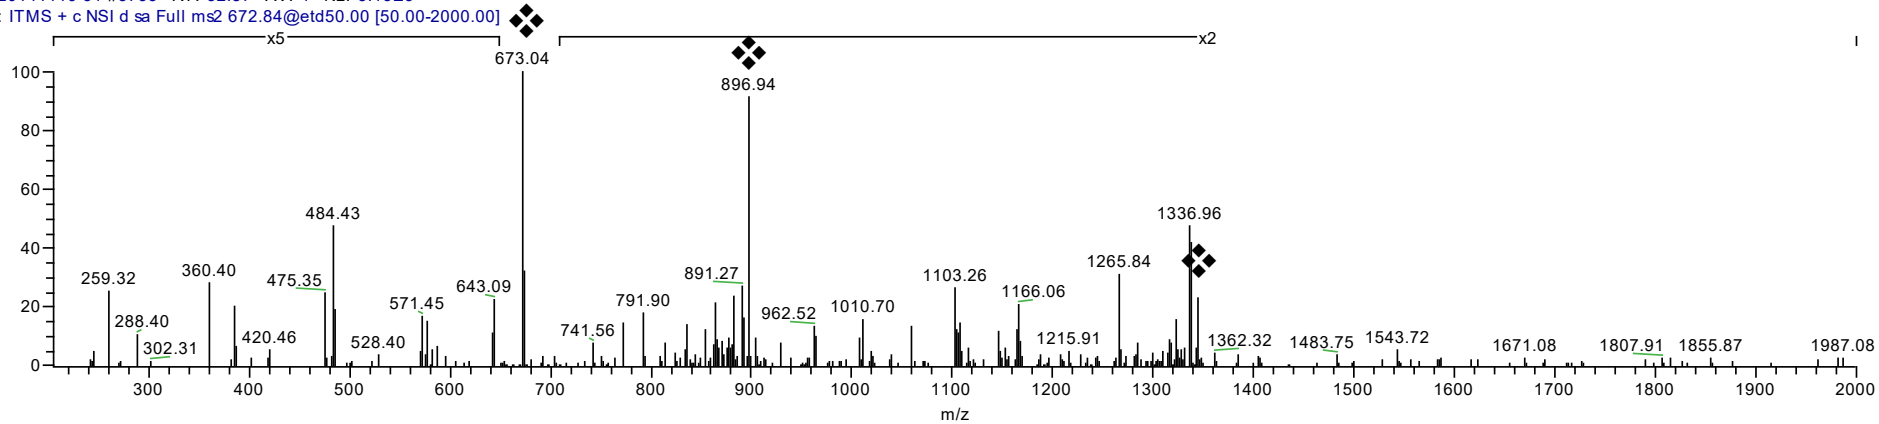

## IQTDTC(GlcNAc)HSTVVHSPEVYSVIIR

## Peak Matches

| 259.3170                                      | 360.4030                                     | 385.4340                                        | 475.3530            | 484.4330                                        | 571.4500                                      | 576.3280                                                     | 643.0950                                      | 673.9720            | 703.5850                                     |
|-----------------------------------------------|----------------------------------------------|-------------------------------------------------|---------------------|-------------------------------------------------|-----------------------------------------------|--------------------------------------------------------------|-----------------------------------------------|---------------------|----------------------------------------------|
| $c_2(0.14)$                                   | $c_3(0.18)$                                  | $z_3(0.17)$                                     | $c_4(0.10)$         | $z_4(0.096)$                                    | $z_5(0.081)$                                  | $c_5(0.029)$<br>$c_{14}^{+3}(0.057)$<br>$c_{-14}^{+3}(0.39)$ | $z_{+111}^{+2}(0.24)$<br>$z_{11}^{+2}(0.75)$  |                     | $c_{11}^{+2}(0.25)$<br>$c_{-111}^{+2}(0.76)$ |
| 741.5560                                      | 772.1180                                     | 791.8960                                        | 813.5690            | 835.7440                                        | 853.8260                                      | 861.8640                                                     | 864.2790                                      | 867.9370            | 870.1260                                     |
| $z_{13}^{+2}(0.14)$<br>$z_{+113}^{+2}(-0.36)$ | $c_{12}^{+2}(0.26)$<br>$c_{-112}^{+2}(0.76)$ | $z_{14}^{+2}(-0.043)$<br>$z_{+114}^{+2}(-0.55)$ |                     | $z_{+115}^{+2}(-0.22)$<br>$z_{15}^{+2}(0.29)$   | $z_{+121}^{+3}(0.078)$<br>$z_{21}^{+3}(0.41)$ |                                                              | $c_{14}^{+2}(0.38)$                           |                     |                                              |
| 875.3980                                      | 883.3300                                     | 904.4260                                        | 928.9490            | 962.5170                                        | 1007.3400                                     | 1010.6990                                                    | 1059.3710                                     | 1059.9840           | 1103.2620                                    |
|                                               |                                              | $z_{+116}^{+2}(-0.063)$<br>$z_{16}^{+2}(0.44)$  | $c_{15}^{+2}(0.53)$ | $z_8(-0.026)$                                   |                                               |                                                              | $c_{17}^{+2}(-0.12)$<br>$c_{-117}^{+2}(0.39)$ | $c_{17}^{+2}(0.49)$ | $c_{18}^{+2}(0.26)$<br>$c_{-118}^{+2}(0.76)$ |
| 1106.5210                                     | 1116.6750                                    | 1146.3870                                       | 1153.7160           | 1165.0410                                       | 1166.0590                                     | 1265.8390                                                    | 1284.6590                                     | 1317.7700           | 1338.5170                                    |
| $c_8(0.052)$                                  |                                              | $z_{10}(-0.24)$                                 |                     | $z_{19}^{+2}(-0.021)$<br>$z_{+119}^{+2}(-0.52)$ | $z_{+119}^{+2}(0.49)$                         | $c_{21}^{+2}(0.22)$<br>$c_{-121}^{+2}(0.72)$                 | $z_{+111}(-0.036)$                            |                     |                                              |

# S Figure 8

YPATC(GlcNAc)VTDIMLSHK

Serine/threonine-protein kinase SIK3 Q6P4S6

Cys-1289

Mouse

V20141119-36 #5554 RT: 52.95 AV  
T: FTMS + c NSI d Full ms2 594.62@

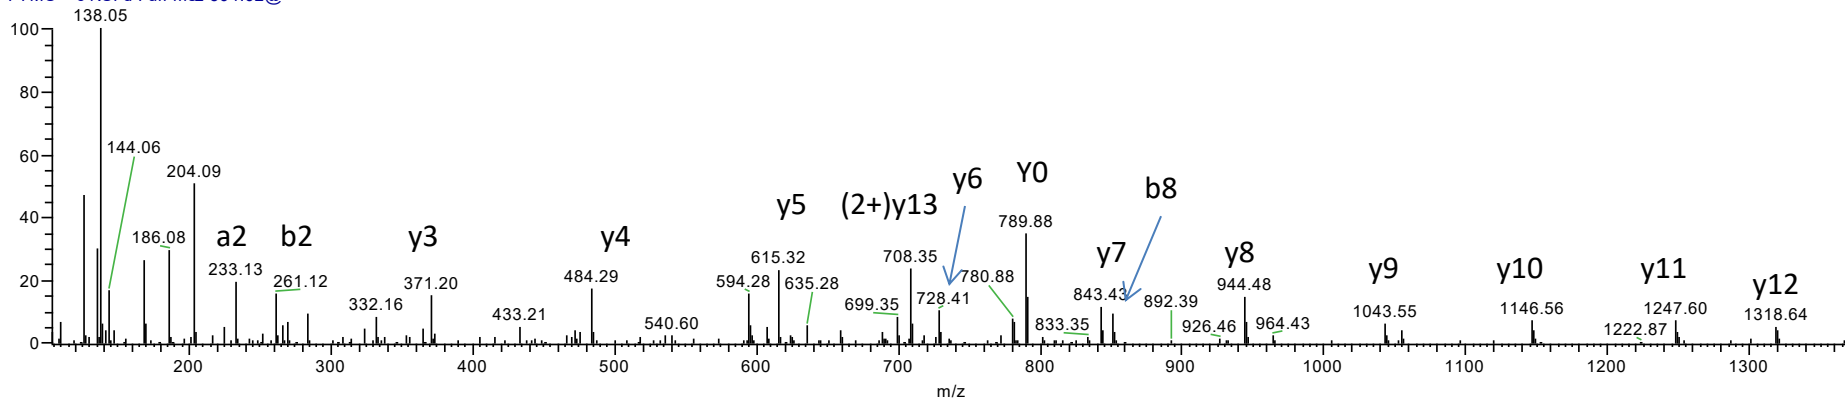

V20141119-36 #5555 RT: 52.95 AV: 1 NL: 1.55E4  
T: ITMS + c NSI d sa Full ms2 594.62@etd66.67 [50.00

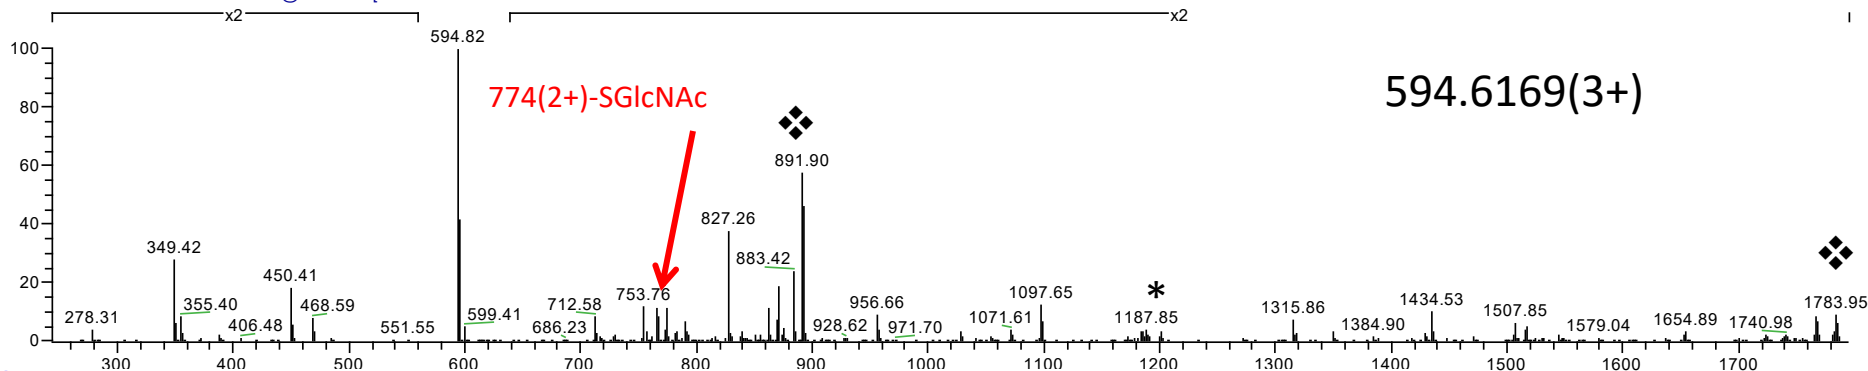

## Peak Matches

|                                                                                 |                                                   |                       |                       |                                                   |                                                                |                        |                         |                                        |                         |
|---------------------------------------------------------------------------------|---------------------------------------------------|-----------------------|-----------------------|---------------------------------------------------|----------------------------------------------------------------|------------------------|-------------------------|----------------------------------------|-------------------------|
| 269.5640                                                                        | 278.3140                                          | 306.4360              | 349.4190              | 355.3960                                          | 371.4170                                                       | 387.8580               | 388.5280                | 406.4800                               | 449.3990                |
| z+1 <sub>2</sub> (0.40)                                                         | c <sub>2</sub> (0.16)                             |                       | c <sub>3</sub> (0.23) | z <sub>3</sub> (0.21)<br>z+1 <sub>3</sub> (-0.80) | y <sub>3</sub> (0.21)                                          |                        |                         |                                        | c-1 <sub>4</sub> (0.17) |
| 450.4060                                                                        | 468.5870                                          | 484.5590              | 596.2800              | 599.4150                                          | 686.2270                                                       | 711.4680               | 712.5770                | 717.3170                               | 728.7080                |
| c <sub>4</sub> (0.17)                                                           | z <sub>4</sub> (0.32)<br>z+1 <sub>4</sub> (-0.69) | y <sub>4</sub> (0.27) |                       | z <sub>5</sub> (0.11)                             |                                                                |                        | z <sub>6</sub> (0.18)   | z+1 <sub>1</sub> <sup>+2</sup> (-0.52) | y <sub>6</sub> (0.30)   |
| 753.7570                                                                        | 765.9480                                          | 773.4090              | 774.2720              | 790.2110                                          | 827.2610                                                       | 871.7530               | 875.2170                | 885.1120                               | 956.6600                |
| z+1 <sub>12</sub> <sup>+2</sup> (-0.10)<br>z <sub>12</sub> <sup>+2</sup> (0.40) |                                                   |                       |                       |                                                   | z <sub>7</sub> (-0.16)<br>c <sub>13</sub> <sup>+2</sup> (0.38) |                        |                         |                                        | c <sub>7</sub> (0.23)   |
| 1027.7150                                                                       | 1071.6120                                         | 1097.6510             | 1184.6650             | 1187.8480                                         | 1200.8160                                                      | 1315.8580              | 1434.5270               | 1506.8330                              | 1515.8800               |
| z <sub>9</sub> (0.18)                                                           | c <sub>8</sub> (0.15)                             | w10                   | c <sub>9</sub> (0.12) |                                                   |                                                                | c <sub>10</sub> (0.28) | z <sub>11</sub> (-0.14) | z+1 <sub>12</sub> (0.12)               | c <sub>12</sub> (0.18)  |



Cys-579

Mouse

NAC(GlcNAc)IAPAAFSGQPQK

V20141119-18 #4074 RT: 38.83 AV:  
T: FTMS + c NSI d Full ms2 853.42@hc

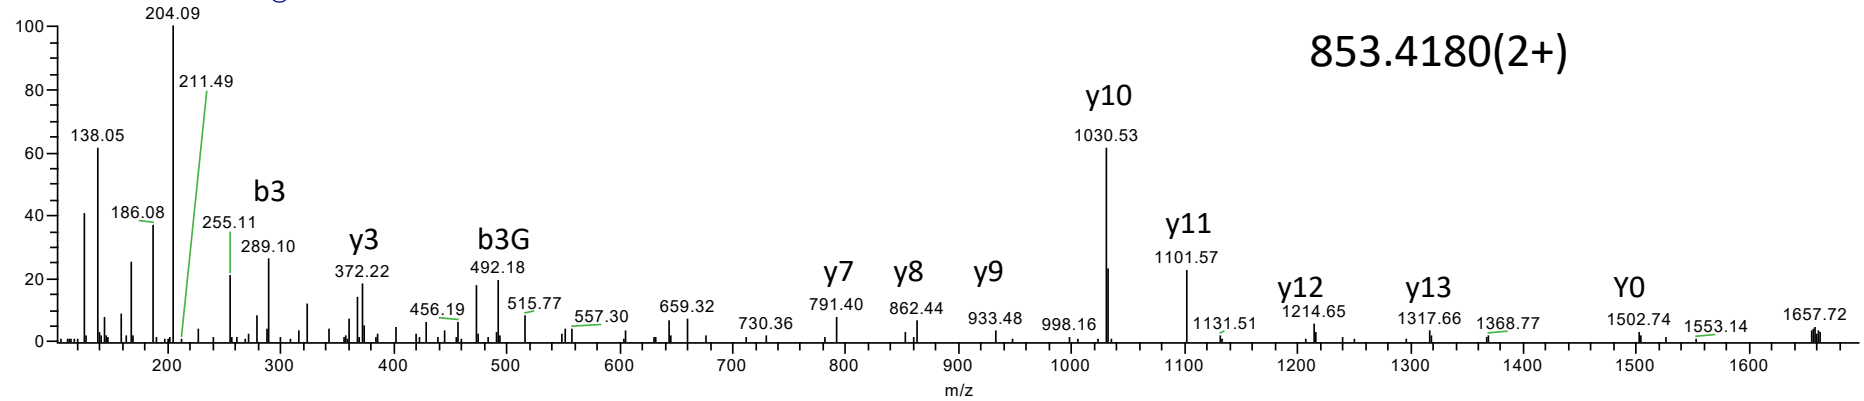

V20141119-18 #4075 RT: 38.84 AV: 1 NL: 6.92E3  
T: ITMS + c NSI d sa Full ms2 853.42@etd100.00 [50.00-1720.00]

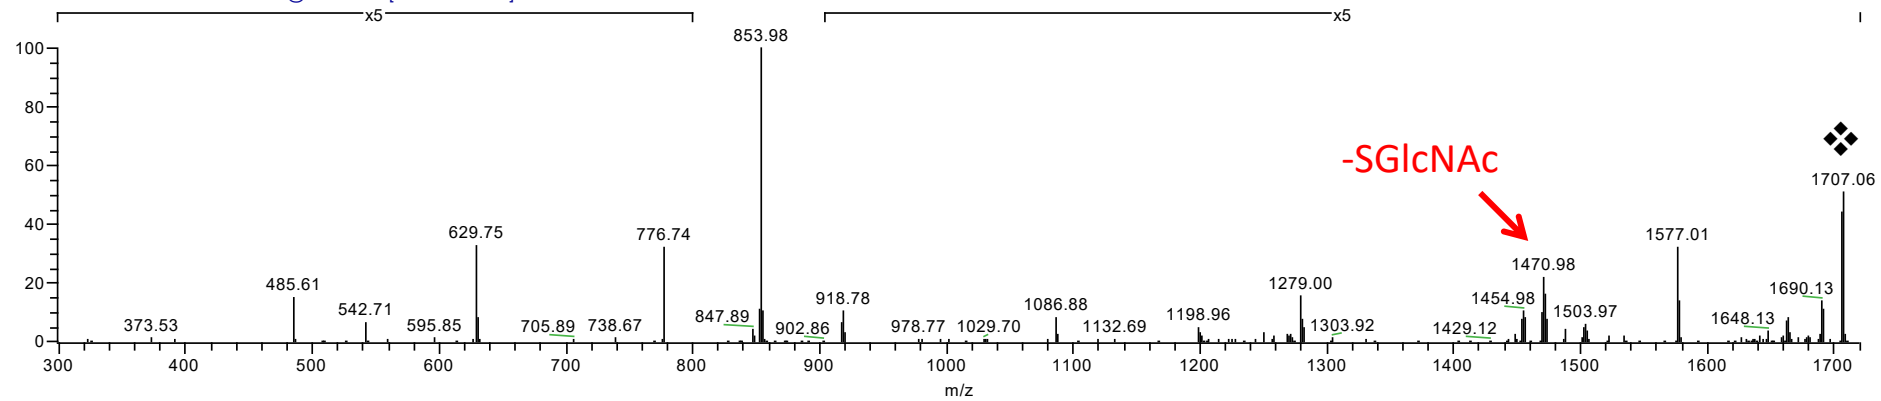

## NAC(GlcNAc)IAPAAFSGQPQK

## [-] Peak Matches

|                                                     |                                                     |                       |                                                                                                            |                                                    |                                                     |                          |                         |                  |                                                   |
|-----------------------------------------------------|-----------------------------------------------------|-----------------------|------------------------------------------------------------------------------------------------------------|----------------------------------------------------|-----------------------------------------------------|--------------------------|-------------------------|------------------|---------------------------------------------------|
| <b>322.6670</b>                                     | <b>326.0350</b>                                     | <b>372.6160</b>       | <b>373.5250</b>                                                                                            | <b>391.2560</b>                                    | <b>485.6090</b>                                     | <b>507.5850</b>          | <b>509.6740</b>         | <b>526.7310</b>  | <b>542.7060</b>                                   |
|                                                     |                                                     | y <sub>3</sub> (0.39) |                                                                                                            |                                                    | z+1 <sub>4</sub> (0.34)                             | c-1 <sub>3</sub> (-0.62) | c <sub>3</sub> (0.46)   |                  | z+1 <sub>5</sub> (0.41)                           |
| <b>559.8100</b>                                     | <b>595.8510</b>                                     | <b>612.8390</b>       | <b>626.7150</b>                                                                                            | <b>628.6710</b>                                    | <b>629.7490</b>                                     | <b>776.7390</b>          | <b>847.8870</b>         | <b>854.8150</b>  | <b>917.8200</b>                                   |
|                                                     |                                                     |                       |                                                                                                            | z <sub>6</sub> (0.35)<br>z+1 <sub>6</sub> (-0.65)  | z+1 <sub>6</sub> (0.42)                             | z+1 <sub>7</sub> (0.35)  | z+1 <sub>8</sub> (0.46) |                  | z <sub>9</sub> (0.36)<br>z+1 <sub>9</sub> (-0.65) |
| <b>1085.9550</b>                                    | <b>1198.9600</b>                                    | <b>1250.3300</b>      | <b>1269.0430</b>                                                                                           | <b>1279.0000</b>                                   | <b>1448.0080</b>                                    | <b>1454.0630</b>         | <b>1469.9520</b>        | <b>1470.9810</b> | <b>1488.4730</b>                                  |
| z <sub>11</sub> (0.40)<br>z+1 <sub>11</sub> (-0.60) | z <sub>12</sub> (0.33)<br>z+1 <sub>12</sub> (-0.68) |                       | w13                                                                                                        |                                                    | c-1 <sub>13</sub> (0.32)<br>c <sub>13</sub> (-0.68) |                          |                         |                  |                                                   |
| <b>1502.9210</b>                                    | <b>1522.2060</b>                                    | <b>1533.8910</b>      | <b>1576.0370</b>                                                                                           | <b>1577.0140</b>                                   | <b>1641.9130</b>                                    |                          |                         |                  |                                                   |
|                                                     |                                                     |                       | z <sub>14</sub> (0.27)<br>c-1 <sub>14</sub> (0.30)<br>c <sub>14</sub> (-0.71)<br>z+1 <sub>14</sub> (-0.74) | z+1 <sub>14</sub> (0.24)<br>c <sub>14</sub> (0.26) |                                                     |                          |                         |                  |                                                   |



GLYDGPVC(GlcNAc)EVSVTPK

Cys-504

Rat

V20150211-10 #3444 RT: 35.79 AV: 1  
T: FTMS + c NSI d Full ms2 884.43@hcr

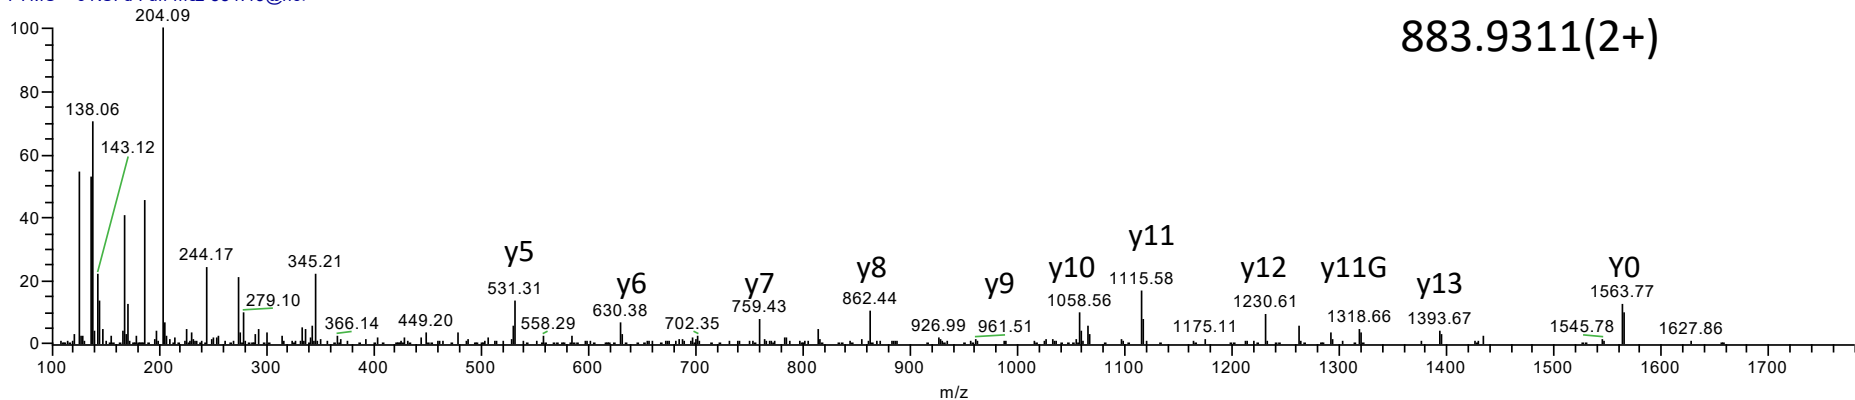

V20150211-10 #3445 RT: 35.80 AV: 1 NL: 3.83E1  
T: ITMS + c NSI d sa Full ms2 884.43@etd100.00 [50.00-1780.00]

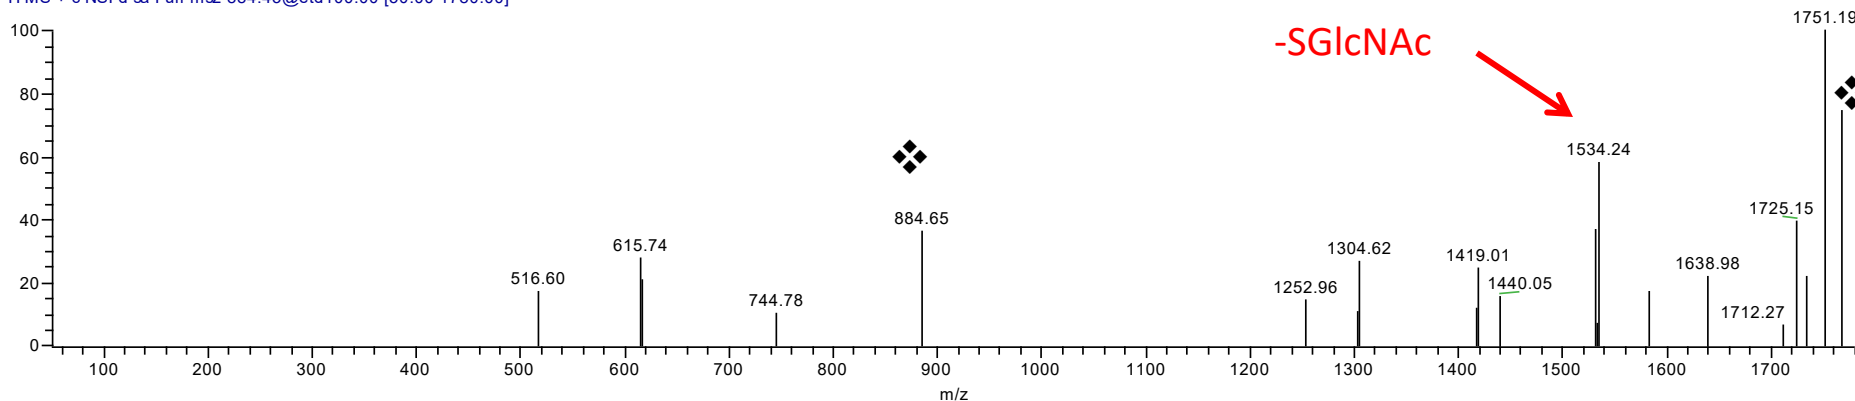

**[-] Peak Matches**

|            |             |            |                           |                           |           |                           |             |           |           |
|------------|-------------|------------|---------------------------|---------------------------|-----------|---------------------------|-------------|-----------|-----------|
| 516.5990   | 615.7390    | 744.7780   | 1252.9620                 | 1302.9580                 | 1304.6230 | 1417.8910                 | 1419.0100   | 1440.0460 | 1531.2700 |
| z+15(0.30) | z+16(0.37)  | z+17(0.36) | c-110(0.39)<br>c10(-0.61) | z11(0.32)<br>z+111(-0.69) |           | z12(0.22)<br>z+112(-0.78) | z+112(0.33) | c12(0.37) |           |
| 1534.2380  | 1582.2560   | 1638.9790  |                           |                           |           |                           |             |           |           |
|            | z+113(0.52) |            |                           |                           |           |                           |             |           |           |

V20150216-22 #4087 RT: 35.14 AV:  
T: FTMS + c NSI d Full ms2 764.71@h

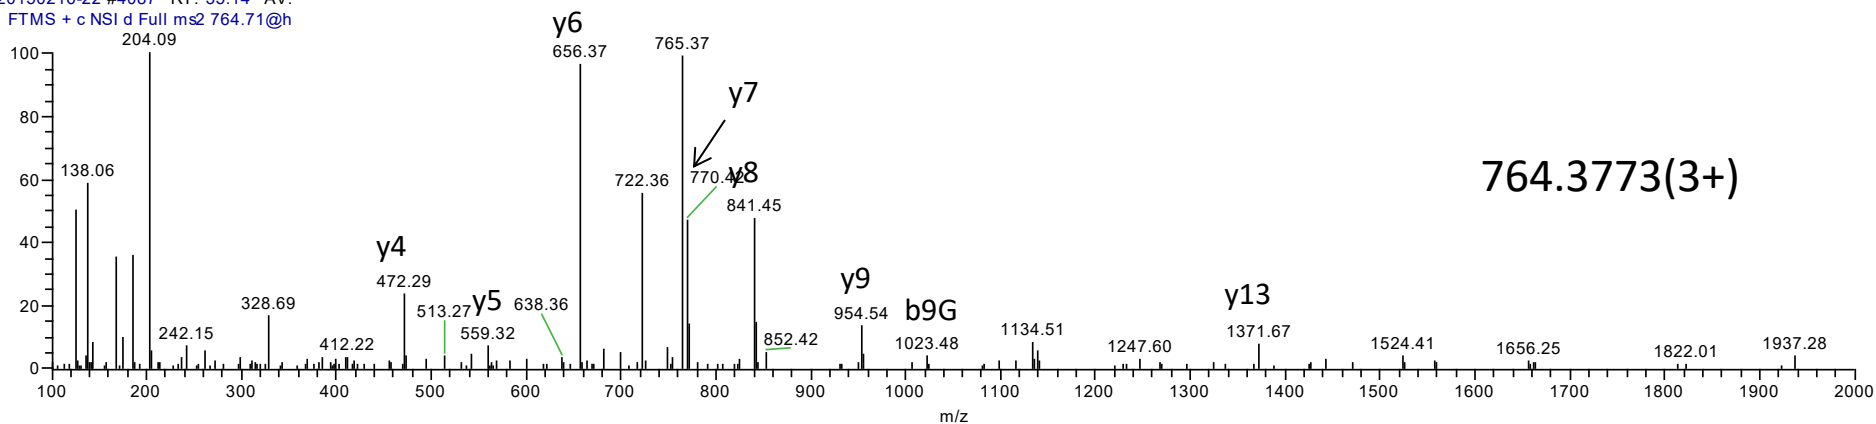

V20150216-22 #4088 RT: 35.15 AV: 1 NL: 4.49E4  
T: ITMS + c NSI d sa Full ms2 764.71@etd66.67 [50.00-2000.00]

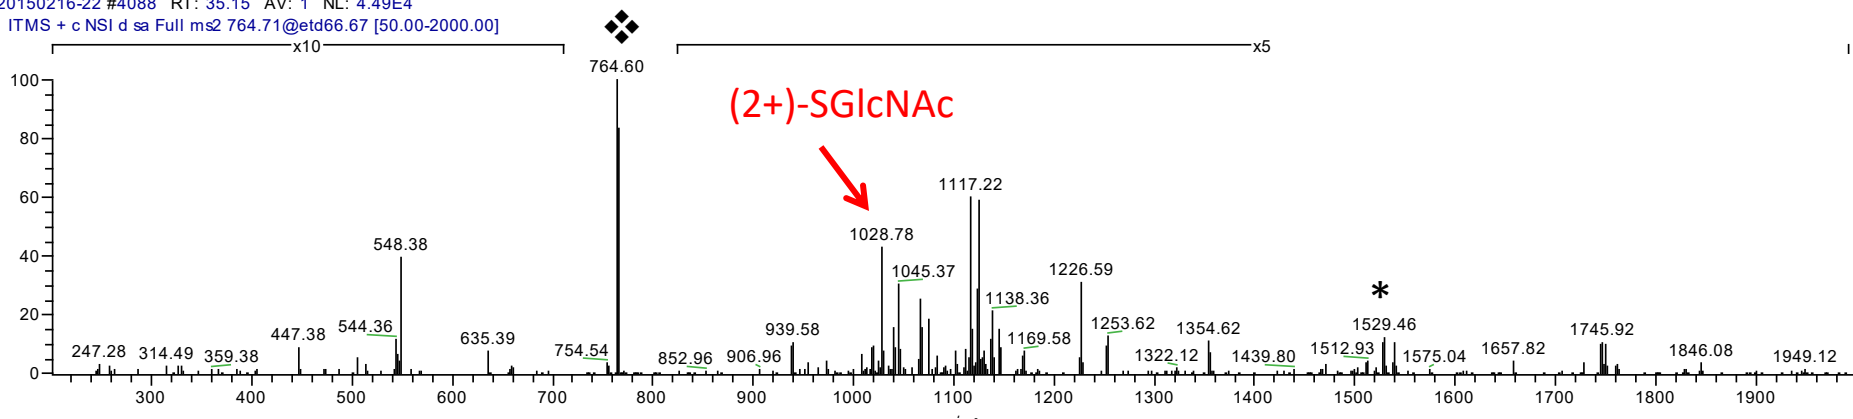

**[-] Peak Matches**

|                         |                         |           |                         |                         |                          |                        |                         |                        |                         |
|-------------------------|-------------------------|-----------|-------------------------|-------------------------|--------------------------|------------------------|-------------------------|------------------------|-------------------------|
| 247.2830                | 258.3390                | 314.4940  | 327.2890                | 330.3090                | 447.3790                 | 505.3890               | 513.3300                | 543.4690               | 547.4420                |
| z+1 <sub>2</sub> (0.14) | c-1 <sub>3</sub> (0.17) |           |                         |                         | c <sub>5</sub> (0.12)    |                        |                         | z <sub>5</sub> (0.17)  | c-1 <sub>6</sub> (0.15) |
| 548.3840                | 635.3950                | 659.7130  | 734.4570                | 754.5380                | 766.0160                 | 770.5030               | 783.0920                | 802.7370               | 852.9600                |
| c <sub>6</sub> (0.080)  | c <sub>7</sub> (0.059)  |           | c <sub>8</sub> (0.053)  | z <sub>7</sub> (0.14)   |                          | y <sub>7</sub> (0.087) |                         |                        |                         |
| 938.5690                | 1008.6550               | 1017.8850 | 1020.3330               | 1027.8080               | 1028.7820                | 1040.5460              | 1044.3980               | 1066.7000              | 1074.5690               |
| z <sub>9</sub> (0.051)  |                         |           |                         |                         |                          | c <sub>9</sub> (0.054) |                         | z <sub>10</sub> (0.12) |                         |
| 1102.4340               | 1111.2470               | 1125.8730 | 1226.5870               | 1252.7170               | 1354.6170                | 1528.2240              | 1538.7710               | 1744.9750              | 1749.9660               |
|                         |                         |           | c <sub>11</sub> (0.031) | z <sub>12</sub> (0.076) | c <sub>12</sub> (0.0025) |                        | c <sub>14</sub> (0.035) | z <sub>15</sub> (0.15) | c <sub>16</sub> (0.13)  |

LGPVYC(GlcNAc)QASFSGTNIIGNK

Cys-322

Rat

V20150213-12 #4145 RT: 41.19 AV  
T: FTMS + c NSI d Full ms2 725.03@

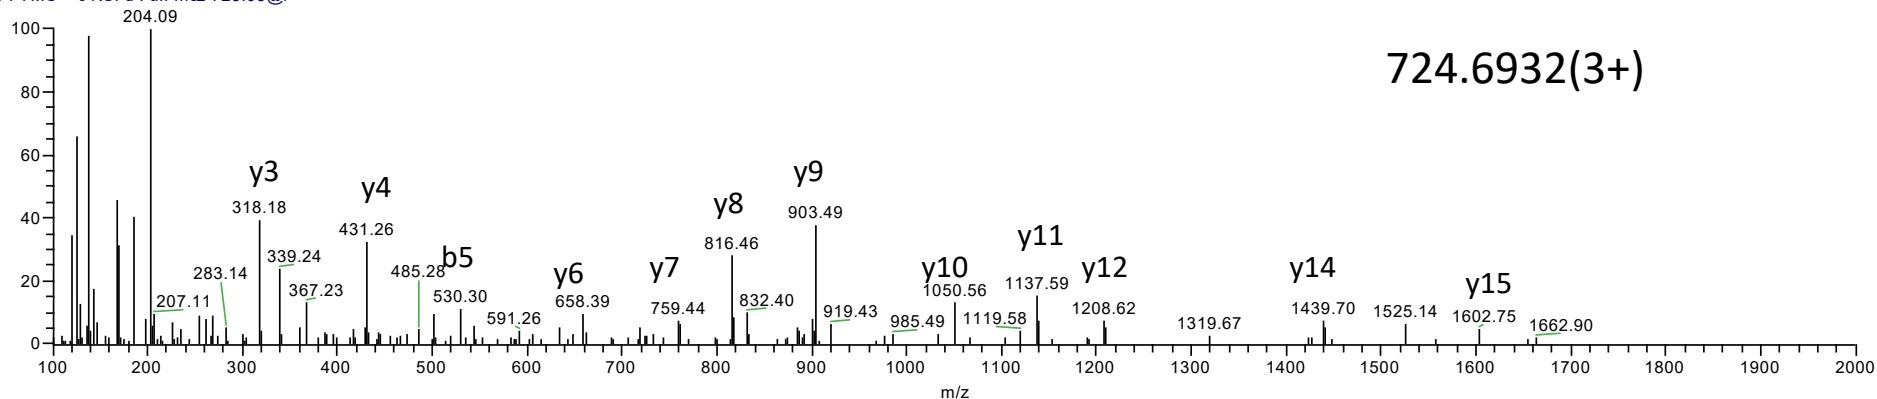

V20150213-12 #4146 RT: 41.20 AV: 1 NL: 2.58E4  
T: ITMS + c NSI d sa Full ms2 725.03@etd66.67 [50.00-2000.00]

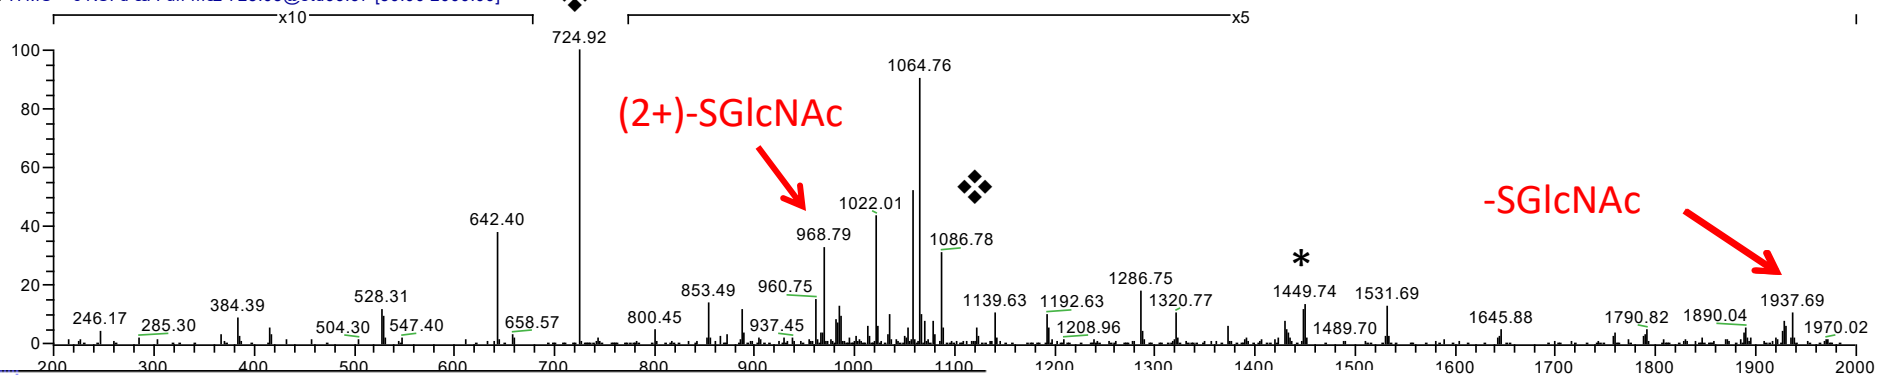

Peak Matches

|                          |                        |                        |                         |                         |                         |                         |                          |                         |                        |
|--------------------------|------------------------|------------------------|-------------------------|-------------------------|-------------------------|-------------------------|--------------------------|-------------------------|------------------------|
| 246.1680                 | 285.2950               | 367.3390               | 384.3930                | 415.4020                | 528.3110                | 547.4010                | 642.4010                 | 658.5650                | 718.9750               |
| z+1 <sub>2</sub> (0.023) | c <sub>3</sub> (0.10)  | b <sub>4</sub> (0.11)  | c <sub>4</sub> (0.13)   | z <sub>4</sub> (0.16)   | z <sub>5</sub> (-0.016) | c <sub>5</sub> (0.077)  | z <sub>6</sub> (0.031)   | y <sub>6</sub> (0.18)   |                        |
| 725.8380                 | 730.0400               | 742.6010               | 743.5360                | 800.4470                | 852.5430                | 853.4900                | 866.3440                 | 872.3020                | 887.5470               |
|                          |                        |                        | z <sub>7</sub> (0.12)   | z <sub>8</sub> (0.0083) | c-1 <sub>6</sub> (0.14) | c <sub>6</sub> (0.077)  |                          |                         | z <sub>9</sub> (0.076) |
| 960.7500                 | 968.7880               | 981.4990               | 985.2580                | 1012.8490               | 1022.0130               | 1034.6060               | 1069.8090                | 1121.6730               | 1139.6340              |
|                          |                        | c <sub>7</sub> (0.027) |                         |                         |                         | z <sub>10</sub> (0.067) |                          | z <sub>11</sub> (0.10)  | c <sub>9</sub> (0.093) |
| 1192.6300                | 1286.7490              | 1320.7740              | 1373.7140               | 1430.6770               | 1448.0430               | 1448.9160               | 1531.6900                | 1929.0300               | 1937.6850              |
| z <sub>12</sub> (0.022)  | c <sub>10</sub> (0.14) | z <sub>13</sub> (0.11) | c <sub>11</sub> (0.072) | c <sub>12</sub> (0.014) |                         |                         | c <sub>13</sub> (-0.021) | c <sub>17</sub> (0.087) |                        |

V20150213-03 #3530 RT: 30.98 AV:  
T: FTMS + c NSI d Full ms2 847.42@hr

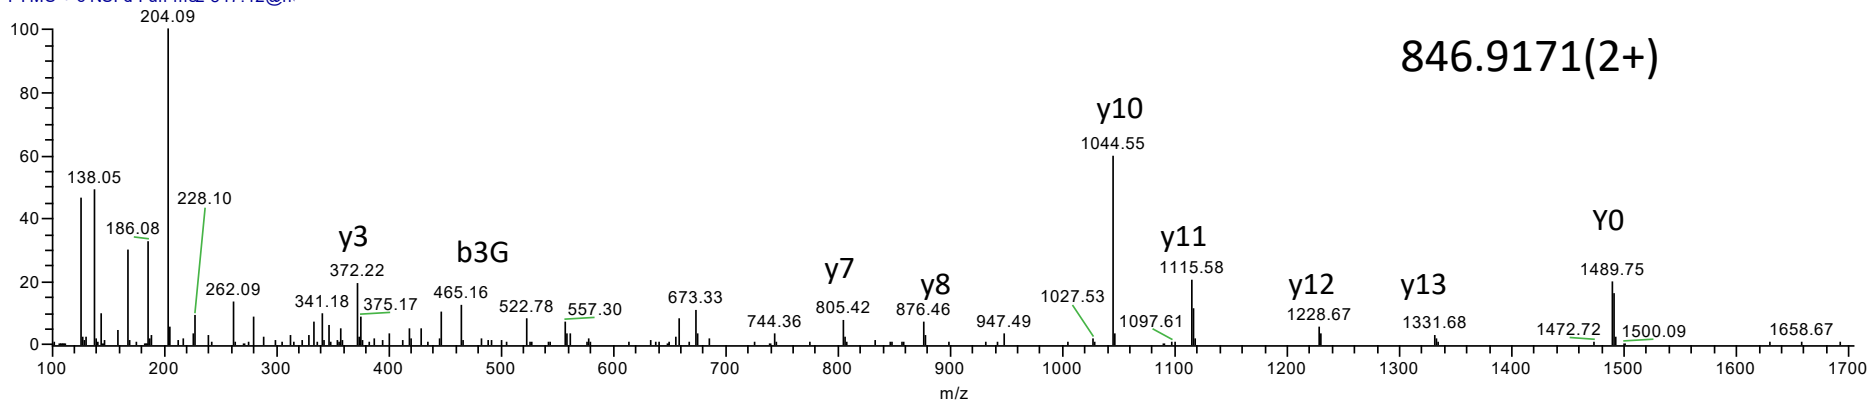

V20150213-03 #3531 RT: 30.98 AV: 1 NL: 7.03E4  
T: ITMS + c NSI d sa Full ms2 847.42@etd100.00 [50.00-1705.00]

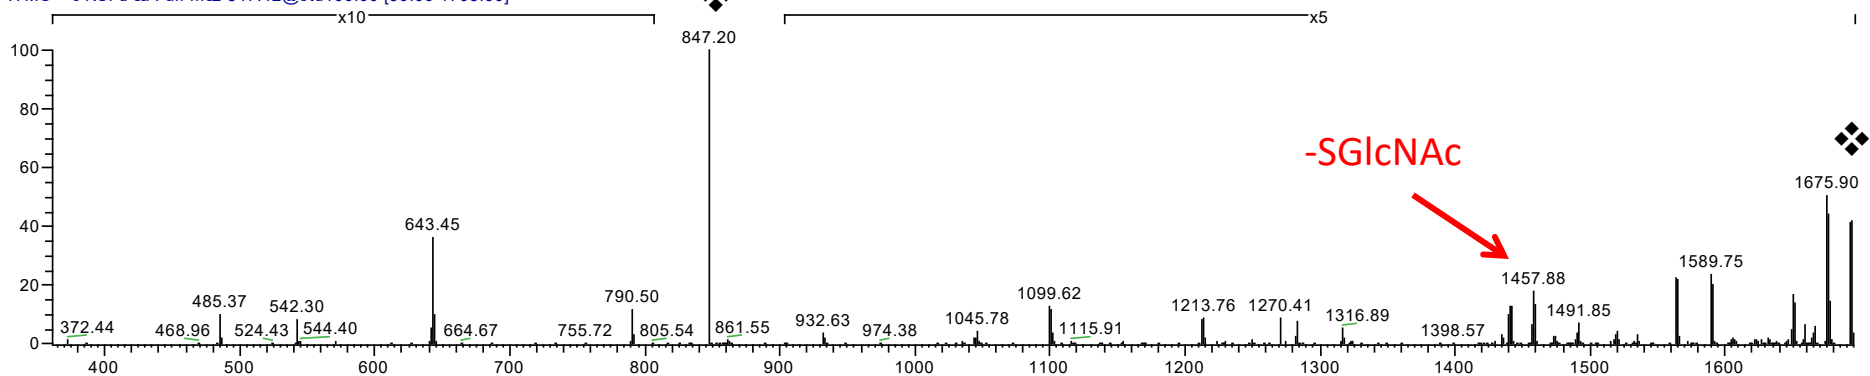

**[-] Peak Matches**

|                          |                         |                        |                          |                          |                          |                         |                         |                           |                         |
|--------------------------|-------------------------|------------------------|--------------------------|--------------------------|--------------------------|-------------------------|-------------------------|---------------------------|-------------------------|
| <b>337.3100</b>          | <b>372.4450</b>         | <b>386.2340</b>        | <b>468.9610</b>          | <b>483.5210</b>          | <b>485.3670</b>          | <b>524.4270</b>         | <b>541.3470</b>         | <b>542.2970</b>           | <b>571.2910</b>         |
|                          | y <sub>3</sub> (0.22)   |                        |                          | z <sub>4</sub> (-0.74)   | z <sub>+14</sub> (0.095) |                         | z <sub>5</sub> (0.062)  | z <sub>+15</sub> (0.0037) |                         |
| <b>611.3440</b>          | <b>626.3580</b>         | <b>640.8660</b>        | <b>642.0770</b>          | <b>643.4500</b>          | <b>790.4950</b>          | <b>861.5480</b>         | <b>932.6250</b>         | <b>1045.7770</b>          | <b>1099.6240</b>        |
|                          |                         |                        | z <sub>6</sub> (-0.26)   | z <sub>+16</sub> (0.11)  | z <sub>+17</sub> (0.086) | z <sub>+18</sub> (0.10) | z <sub>+19</sub> (0.14) |                           | z <sub>11</sub> (0.058) |
| <b>1212.8690</b>         | <b>1270.4060</b>        | <b>1281.8010</b>       | <b>1282.7700</b>         | <b>1316.8890</b>         | <b>1434.9590</b>         | <b>1439.9030</b>        | <b>1456.7820</b>        | <b>1457.8790</b>          | <b>1490.8820</b>        |
| z <sub>12</sub> (0.22)   |                         |                        | w <sub>13</sub>          |                          | c <sub>-13</sub> (0.28)  |                         |                         |                           |                         |
| z <sub>+12</sub> (-0.79) |                         |                        |                          |                          | c <sub>13</sub> (-0.73)  |                         |                         |                           |                         |
| <b>1491.8500</b>         | <b>1518.5750</b>        | <b>1535.3330</b>       | <b>1563.7370</b>         | <b>1589.7490</b>         |                          |                         |                         |                           |                         |
|                          | z <sub>13</sub> (-0.16) | y <sub>13</sub> (0.58) | c <sub>14</sub> (-0.011) | z <sub>14</sub> (-0.027) |                          |                         |                         |                           |                         |

TPGQPQVC(GlcNAc)VSQATMATC(Cm)K

Cys-980

Mouse

V20150116-16 #2304 RT: 30.46 AV: 1  
T: FTMS + c NSI d Full ms2 704.33@hcr

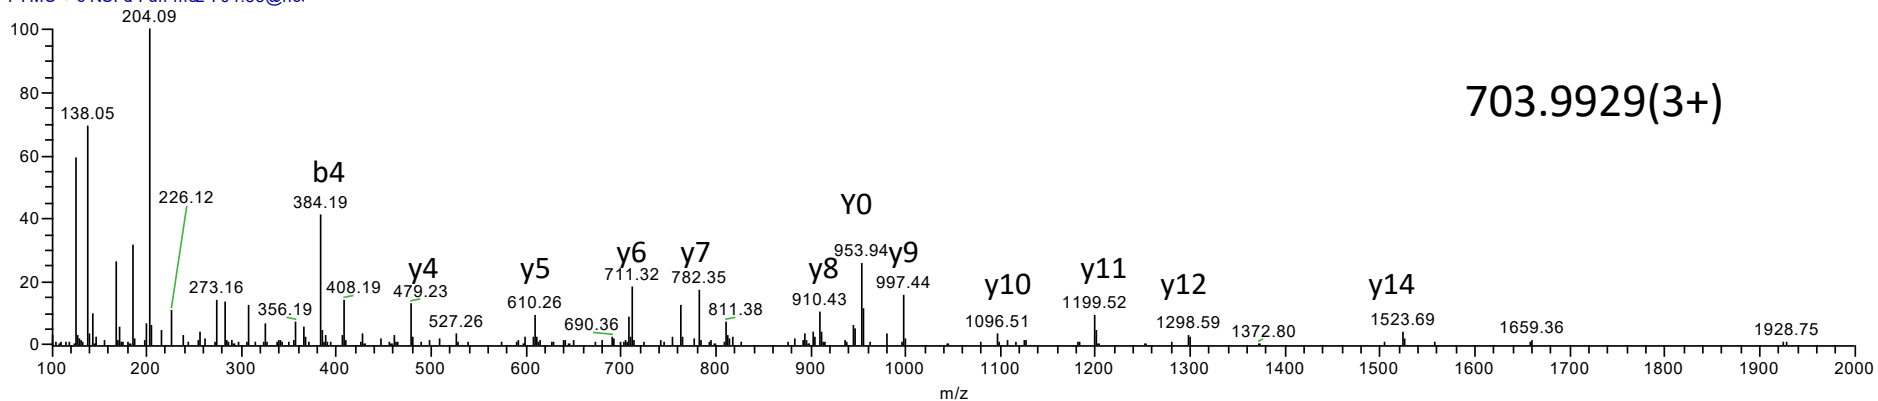

V20150116-16 #2305 RT: 30.46 AV: 1 NL: 3.20E4  
T: ITMS + c NSI d sa Full ms2 704.33@etd66.67 [50.00-2000.00]

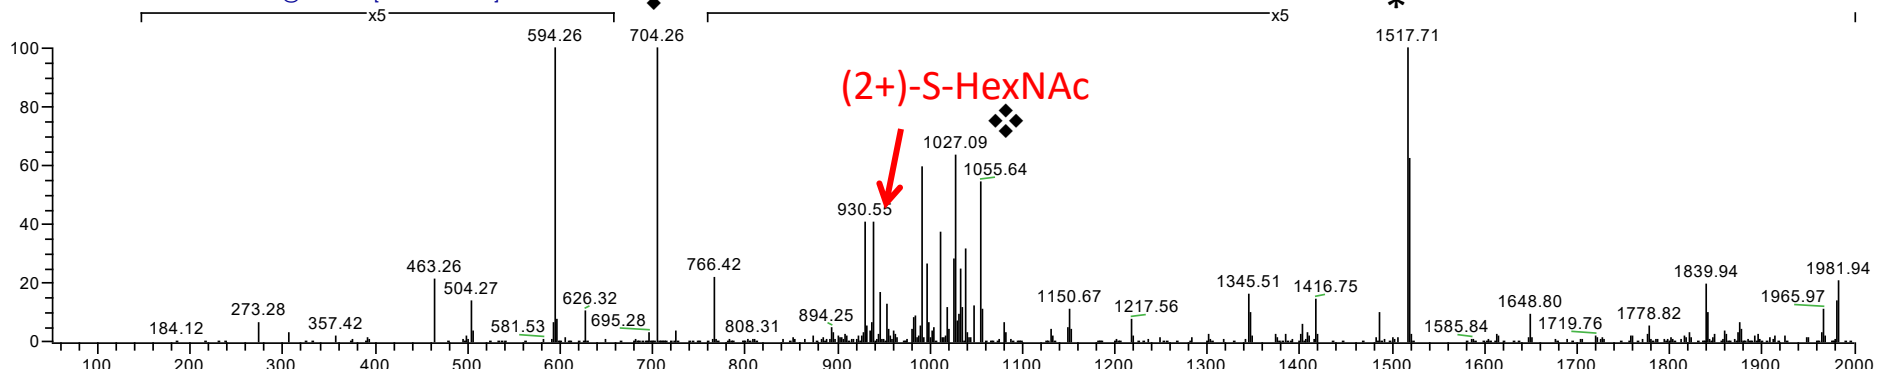

**[-] Peak Matches**

|                       |                         |                         |                         |                          |                          |                         |                           |                          |                         |
|-----------------------|-------------------------|-------------------------|-------------------------|--------------------------|--------------------------|-------------------------|---------------------------|--------------------------|-------------------------|
| <b>273.2800</b>       | <b>307.1550</b>         | <b>357.4210</b>         | <b>463.2620</b>         | <b>498.3460</b>          | <b>504.2660</b>          | <b>593.3880</b>         | <b>594.2570</b>           | <b>626.3240</b>          | <b>681.5120</b>         |
| c <sub>3</sub> (0.12) | y <sub>2</sub> (0.012)  |                         | z <sub>4</sub> (0.052)  | c <sub>5</sub> (0.079)   |                          |                         | z <sub>5</sub> (0.0070)   | c <sub>6</sub> (-0.0017) |                         |
| <b>694.3440</b>       | <b>695.2850</b>         | <b>705.2080</b>         | <b>711.3900</b>         | <b>724.5390</b>          | <b>725.4460</b>          | <b>766.4150</b>         | <b>874.0200</b>           | <b>894.2540</b>          | <b>901.3130</b>         |
|                       | z <sub>6</sub> (-0.013) |                         | y <sub>6</sub> (0.074)  | c- <sub>17</sub> (0.15)  | c- <sub>7</sub> (0.052)  | z- <sub>7</sub> (0.080) |                           | z <sub>8</sub> (-0.14)   |                         |
| <b>930.5490</b>       | <b>938.2180</b>         | <b>946.0280</b>         | <b>954.2940</b>         | <b>982.4700</b>          | <b>990.6710</b>          | <b>997.1600</b>         | <b>1010.8230</b>          | <b>1019.1080</b>         | <b>1025.1600</b>        |
|                       |                         |                         |                         | z+ <sub>19</sub> (0.037) |                          | y <sub>9</sub> (-0.28)  |                           |                          |                         |
| <b>1038.7150</b>      | <b>1150.6670</b>        | <b>1345.5140</b>        | <b>1416.7520</b>        | <b>1485.6030</b>         | <b>1517.7070</b>         | <b>1648.8020</b>        | <b>1839.1630</b>          | <b>1965.9730</b>         | <b>1980.9040</b>        |
|                       |                         | c <sub>11</sub> (-0.13) | c <sub>12</sub> (0.070) | z <sub>12</sub> (-0.051) | c <sub>13</sub> (-0.022) | c <sub>14</sub> (0.032) | z <sub>15</sub> (0.34)    |                          | c <sub>17</sub> (0.019) |
|                       |                         |                         |                         |                          |                          |                         | z+ <sub>115</sub> (-0.67) |                          |                         |

Cys-579

Mouse

NAC(GlcNAc)IAPAAFSGQPQK

V20150116-19 #2293 RT: 29.79 AV: 1  
T: FTMS + c NSI d Full ms2 853.42@hcr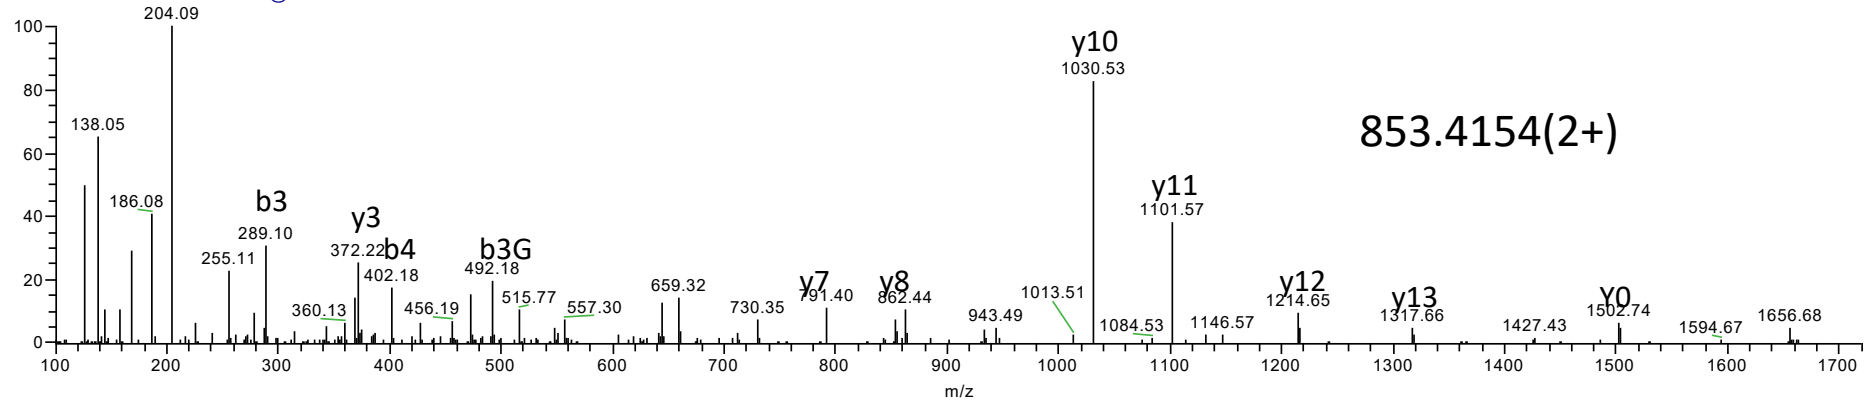

853.4154(2+)

V20150116-19 #2294 RT: 29.80 AV: 1 NL: 2.53E4  
T: ITMS + c NSI d sa Full ms2 853.42@etd100.00 [50.00-1720.00]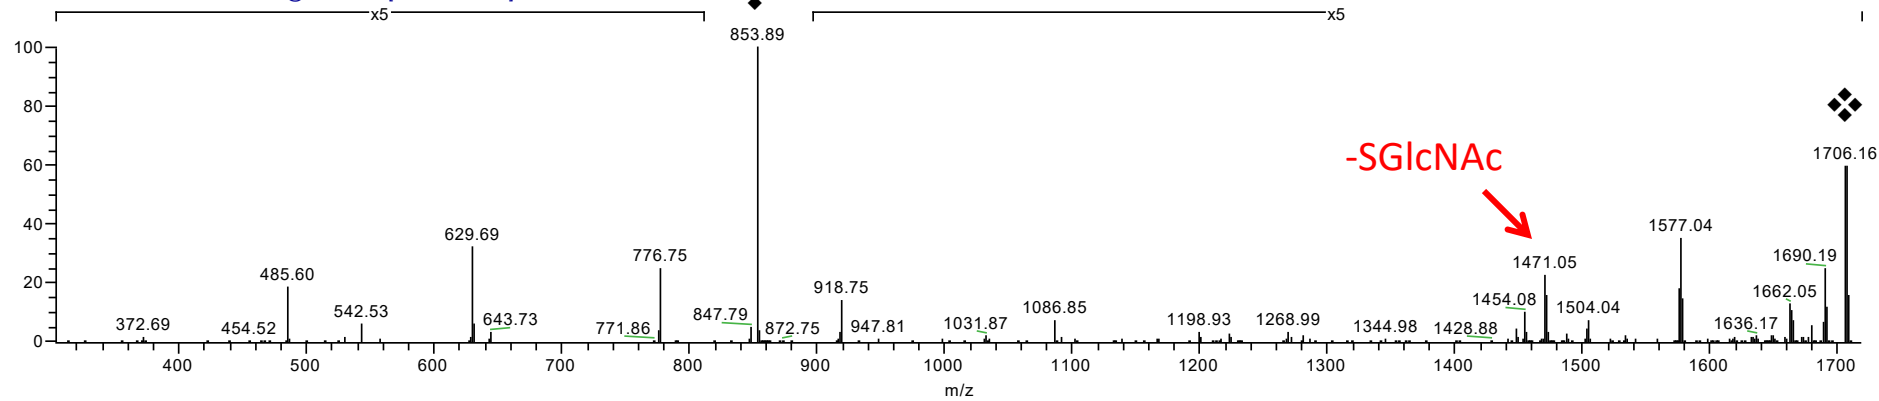

## NAC(GlcNAc)IAPAAFSGQPQK

## [-] Peak Matches

| 312.5530                                          | 325.7990                                            | 366.5980                                          | 370.7740                | 372.6940                | 421.4680                                          | 454.5180                                          | 466.6710                                            | 483.6150                                                                                                   | 485.6000                                            |
|---------------------------------------------------|-----------------------------------------------------|---------------------------------------------------|-------------------------|-------------------------|---------------------------------------------------|---------------------------------------------------|-----------------------------------------------------|------------------------------------------------------------------------------------------------------------|-----------------------------------------------------|
|                                                   |                                                     |                                                   |                         | y <sub>3</sub> (0.47)   |                                                   |                                                   |                                                     | z <sub>4</sub> (-0.65)                                                                                     | z+1 <sub>4</sub> (0.33)                             |
| 499.6160                                          | 514.7640                                            | 524.8190                                          | 529.7200                | 542.5330                | 557.6130                                          | 628.7810                                          | 629.6940                                            | 642.8330                                                                                                   | 643.7290                                            |
| y <sub>4</sub> (-0.67)                            |                                                     |                                                   |                         | z+1 <sub>5</sub> (0.24) | y <sub>5</sub> (0.31)                             | z <sub>6</sub> (0.46)<br>z+1 <sub>6</sub> (-0.54) | z+1 <sub>6</sub> (0.37)                             |                                                                                                            | y <sub>6</sub> (-0.61)                              |
| 775.7820                                          | 776.7470                                            | 846.7940                                          | 847.7910                | 854.8630                | 917.7180                                          | 918.7540                                          | 1085.8200                                           | 1198.9340                                                                                                  | 1222.9480                                           |
| z <sub>7</sub> (0.40)<br>z+1 <sub>7</sub> (-0.61) | z+1 <sub>7</sub> (0.35)                             | z <sub>8</sub> (0.37)<br>z+1 <sub>8</sub> (-0.64) | z+1 <sub>8</sub> (0.36) |                         | z <sub>9</sub> (0.26)<br>z+1 <sub>9</sub> (-0.75) | z+1 <sub>9</sub> (0.29)                           | z <sub>11</sub> (0.27)<br>z+1 <sub>11</sub> (-0.74) | z <sub>12</sub> (0.30)<br>z+1 <sub>12</sub> (-0.71)                                                        | c-1 <sub>11</sub> (0.38)<br>c <sub>11</sub> (-0.63) |
| 1268.9910                                         | 1448.0450                                           | 1454.0830                                         | 1469.9460               | 1471.0500               | 1488.0740                                         | 1503.1710                                         | 1504.0430                                           | 1576.0690                                                                                                  | 1577.0370                                           |
| w13                                               | c-1 <sub>13</sub> (0.37)<br>c <sub>13</sub> (-0.64) |                                                   |                         |                         |                                                   |                                                   | z <sub>13</sub> (-0.68)                             | z <sub>14</sub> (0.31)<br>c-1 <sub>14</sub> (0.33)<br>c <sub>14</sub> (-0.68)<br>z+1 <sub>14</sub> (-0.70) | z+1 <sub>14</sub> (0.27)<br>c <sub>14</sub> (0.29)  |

V20150116-16 #2794 RT: 35.09 AV  
T: FTMS + c NSI d Full ms2 764.71@f

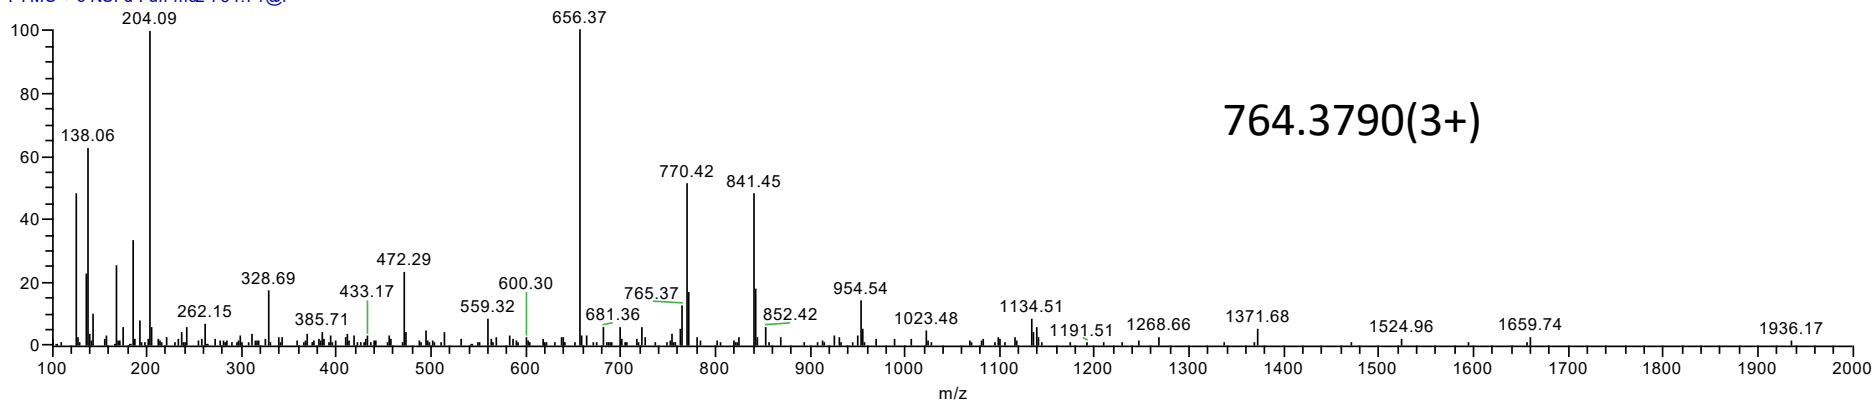

V20150116-16 #2795 RT: 35.11 AV: 1 NL: 1.66E4  
T: ITMS + c NSI d sa Full ms2 764.71@etd66.67 [50.00-2000.00]

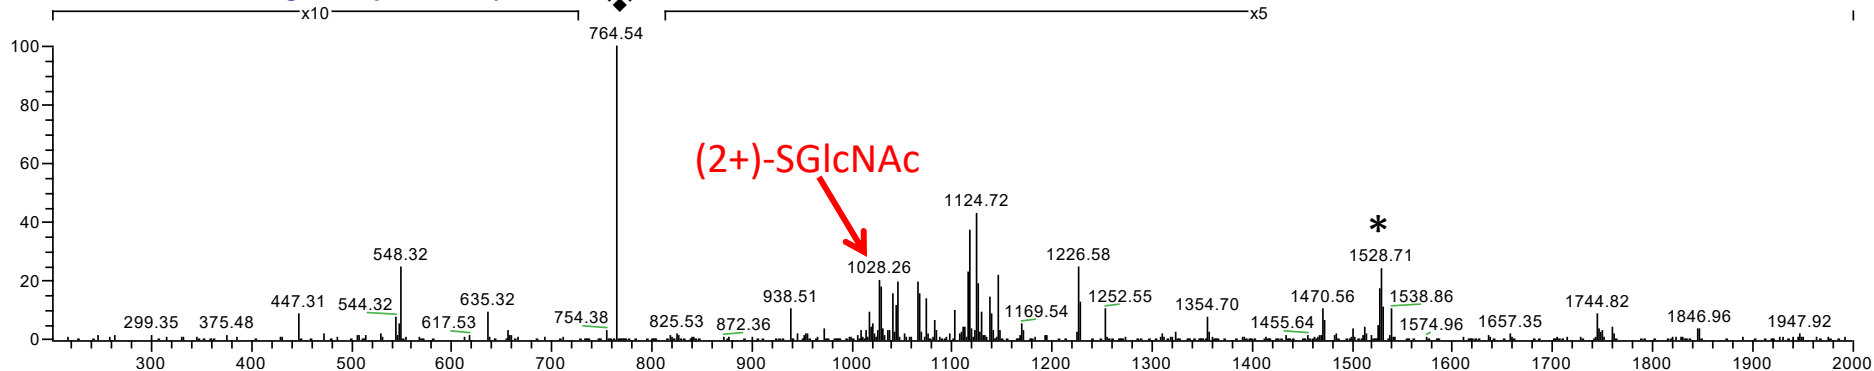

[-] Peak Matches

|                          |                          |                         |                          |                         |                       |                          |                         |                          |                          |
|--------------------------|--------------------------|-------------------------|--------------------------|-------------------------|-----------------------|--------------------------|-------------------------|--------------------------|--------------------------|
| 247.2160                 | 299.3520                 | 446.3520                | 447.3080                 | 472.3580                | 529.3720              | 543.3710                 | 544.3220                | 547.2850                 | 548.3230                 |
| z <sub>12</sub> (0.076)  |                          | c <sub>15</sub> (0.10)  | c <sub>5</sub> (0.052)   | y <sub>4</sub> (0.070)  |                       | z <sub>5</sub> (0.070)   | z <sub>15</sub> (0.013) | c <sub>16</sub> (-0.011) | c <sub>6</sub> (0.019)   |
| 635.3180                 | 656.3720                 | 734.4910                | 754.3750                 | 766.4370                | 770.5660              | 802.5610                 | 818.7000                | 825.5260                 | 872.3620                 |
| c <sub>7</sub> (-0.018)  | y <sub>6</sub> (-6.0e-4) | c <sub>8</sub> (0.087)  | z <sub>7</sub> (-0.022)  |                         | y <sub>7</sub> (0.15) |                          |                         | z <sub>8</sub> (0.092)   |                          |
| 938.5140                 | 1017.5970                | 1028.2590               | 1040.4610                | 1044.2860               | 1045.1530             | 1066.5490                | 1074.3270               | 1082.1060                | 1102.3540                |
| z <sub>9</sub> (-0.0040) |                          |                         | c <sub>9</sub> (-0.036)  |                         |                       | z <sub>10</sub> (-0.028) |                         | y <sub>10</sub> (-0.49)  |                          |
| 1129.6820                | 1169.5440                | 1226.5770               | 1252.5500                | 1354.6980               | 1470.5570             | 1526.6390                | 1527.5600               | 1538.8570                | 1744.8190                |
|                          | c <sub>10</sub> (0.0044) | c <sub>11</sub> (0.016) | z <sub>12</sub> (-0.091) | c <sub>12</sub> (0.078) |                       |                          |                         | c <sub>14</sub> (0.12)   | z <sub>15</sub> (-0.015) |



LDFGQSGSPVC(Cgly)LAQVK<sup>3</sup>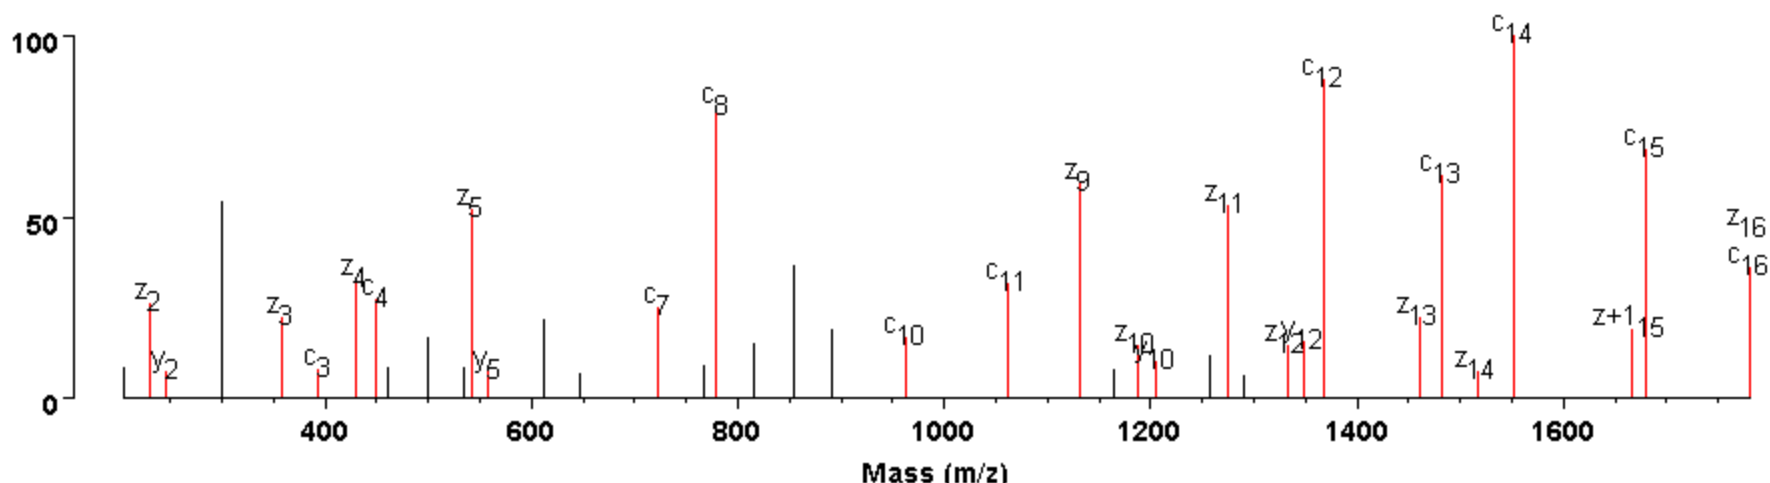

| MH <sup>+</sup> 1(av) | MH <sup>+</sup> 1(mono) | MH <sup>+</sup> 2(av) | MH <sup>+</sup> 2(mono) | MH <sup>+</sup> 3(av) | MH <sup>+</sup> 3(mono) |
|-----------------------|-------------------------|-----------------------|-------------------------|-----------------------|-------------------------|
| 1910.1664             | 1908.9372               | 955.5869              | 954.9722                | 637.3938              | 636.9839                |

## [-] Peak Matches

|                        |                        |                              |                        |                              |                          |                        |                              |                              |                                                |
|------------------------|------------------------|------------------------------|------------------------|------------------------------|--------------------------|------------------------|------------------------------|------------------------------|------------------------------------------------|
| <b>204.0854</b>        | <b>230.1621</b>        | <b>246.1809</b>              | <b>300.1911</b>        | <b>358.2204</b>              | <b>393.2123</b>          | <b>429.2573</b>        | <b>450.2340</b>              | <b>461.2473</b>              | <b>499.2864</b>                                |
| 204.0854               | 230.1621               | 246.1809                     | 300.1911               | 358.2204                     | 393.2123                 | 429.2573               | 450.2340                     | 461.2473                     | 499.2864                                       |
|                        | z <sub>2</sub> (-1.7)  | y <sub>2</sub> (-1.2)        |                        | z <sub>3</sub> (-2.0)        | c <sub>3</sub> (-2.3)    | z <sub>4</sub> (-2.1)  | c <sub>4</sub> (-1.6)        |                              |                                                |
| <b>534.2790</b>        | <b>542.3415</b>        | <b>558.3599</b>              | <b>612.3708</b>        | <b>646.3556</b>              | <b>722.3460</b>          | <b>779.3673</b>        | <b>963.4535</b>              | <b>1062.5193</b>             | <b>1131.5818</b>                               |
| 534.2790               | 542.3415               | 558.3599                     | 612.3708               | 646.3556                     | 722.3460                 | 779.3673               | 963.4535                     | 1062.5193                    | 1131.5818                                      |
|                        | z <sub>5</sub> (-1.4)  | y <sub>5</sub> (-2.0)        | w6                     |                              | c <sub>7</sub> (-1.1)    | c <sub>8</sub> (-1.3)  | c <sub>10</sub> (0.47)       | c <sub>11</sub> (-2.0)       | z <sub>9</sub> (-2.0)                          |
| <b>1163.5720</b>       | <b>1188.6041</b>       | <b>1204.6219</b>             | <b>1257.6377</b>       | <b>1275.6346</b>             | <b>1290.6464</b>         | <b>1332.6576</b>       | <b>1348.6752</b>             | <b>1368.6078</b>             | <b>1460.7142</b>                               |
| 1163.5720              | 1188.6041              | 1204.6219                    | 1257.6377              | 1275.6346                    | 1290.6464                | 1332.6576              | 1348.6752                    | 1368.6078                    | 1460.7142                                      |
|                        | z <sub>10</sub> (-1.1) | y <sub>10</sub> (-1.9)       |                        | z <sub>11</sub> (-2.2)       |                          | z <sub>12</sub> (-1.0) | y <sub>12</sub> (-1.9)       | c <sub>12</sub> (-1.6)       | z <sub>13</sub> (-2.3)                         |
| <b>1481.6910</b>       | <b>1517.7363</b>       | <b>767.3810<sup>+2</sup></b> | <b>1552.7289</b>       | <b>814.9349<sup>+2</sup></b> | <b>1665.8119</b>         | <b>1680.7867</b>       | <b>853.4307<sup>+2</sup></b> | <b>890.4230<sup>+2</sup></b> | <b>1779.8525</b>                               |
| 1481.6910              | 1517.7363              | 1533.7547                    | 1552.7289              | 1628.8625                    | 1665.8119                | 1680.7867              | 1705.8540                    | 1779.8388                    | 1779.8525                                      |
| c <sub>13</sub> (-2.0) | z <sub>14</sub> (-1.8) |                              | c <sub>14</sub> (-1.5) |                              | z+1 <sub>15</sub> (-2.0) | c <sub>15</sub> (-1.8) |                              |                              | c <sub>16</sub> (-3.2)<br>z <sub>16</sub> (10) |

# FPFGSSC(Cgly)TGTFHPAPSAPDK<sup>+3</sup>

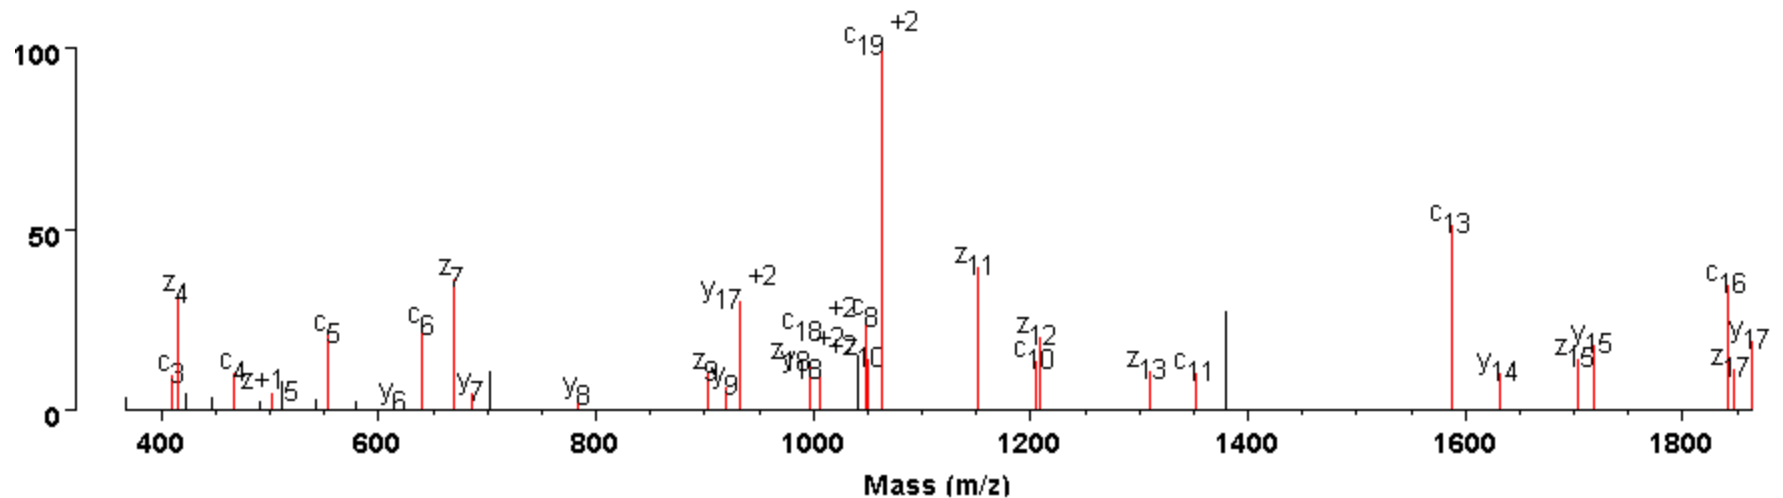

| MH <sup>+1</sup> (av) | MH <sup>+1</sup> (mono) | MH <sup>+2</sup> (av) | MH <sup>+2</sup> (mono) | MH <sup>+3</sup> (av) | MH <sup>+3</sup> (mono) |
|-----------------------|-------------------------|-----------------------|-------------------------|-----------------------|-------------------------|
| 2255.4828             | 2254.0121               | 1128.2451             | 1127.5097               | 752.4992              | 752.0089                |

## [-] Peak Matches

| 366.2163       | 409.2221       | 414.2099       | 423.2375       | 446.1989       | 466.2436               | 491.2521               | 502.2491                                    | 510.2699                | 541.2519                |
|----------------|----------------|----------------|----------------|----------------|------------------------|------------------------|---------------------------------------------|-------------------------|-------------------------|
| 366.2163       | 409.2221       | 414.2099       | 423.2375       | 446.1989       | 466.2436               | 491.2521               | 502.2491                                    | 510.2699                | 541.2519                |
|                | $c_3(-3.3)$    | $z_4(-2.3)$    |                |                | $c_4(-2.7)$            |                        | $z+1_5(-3.3)$                               |                         |                         |
| 553.2757       | 578.2842       | 614.3126       | 640.3077       | 669.3314       | 685.3494               | 701.3209               | 782.4053                                    | 903.4428                | 919.4624                |
| 553.2757       | 578.2842       | 614.3126       | 640.3077       | 669.3314       | 685.3494               | 701.3209               | 782.4053                                    | 903.4428                | 919.4624                |
| $c_5(-2.2)$    |                | $y_6(-3.0)$    | $c_6(-2.0)$    | $z_7(-2.2)$    | $y_7(-3.2)$            |                        | $y_8(1.3)$                                  | $z_9(-1.9)$             | $y_9(-0.88)$            |
| 1047.4430      | 1050.5118      | 1151.5575      | 1205.5111      | 1208.5778      | 1309.6335              | 1352.5765              | 1379.6552                                   | 1586.6908               | 1631.7328               |
| 1047.4430      | 1050.5118      | 1151.5575      | 1205.5111      | 1208.5778      | 1309.6335              | 1352.5765              | 1379.6552                                   | 1586.6908               | 1631.7328               |
| $c_8(-2.1)$    | $z_{10}(-1.0)$ | $z_{11}(-2.7)$ | $c_{10}(-2.7)$ | $z_{12}(-3.5)$ | $z_{13}(2.9)$          | $c_{11}(-4.6)$         | w14                                         | $c_{13}(-2.3)$          | $y_{14}(-2.6)$          |
| 1702.7417      | 1718.7629      | 1841.8104      | 1846.8008      | 1862.8112      | 931.9115 <sup>+2</sup> | 997.4388 <sup>+2</sup> | 1005.4485 <sup>+2</sup>                     | 1040.9637 <sup>+2</sup> | 1062.9673 <sup>+2</sup> |
| 1702.7417      | 1718.7629      | 1841.8104      | 1846.8008      | 1862.8112      | 1862.8157              | 1993.8703              | 2009.8898                                   | 2080.9202               | 2124.9273               |
| $z_{15}(-5.1)$ | $y_{15}(-3.5)$ | $c_{16}(-3.2)$ | $z_{17}(-1.6)$ | $y_{17}(-6.1)$ | $y_{17}^{+2}(-3.6)$    | $z_{18}^{+2}(-0.96)$   | $y_{18}^{+2}(-0.55)$<br>$c_{18}^{+2}(-8.1)$ |                         | $c_{19}^{+2}(-2.7)$     |

QKAPFPATC(Cgly)EAPSR<sup>+3</sup>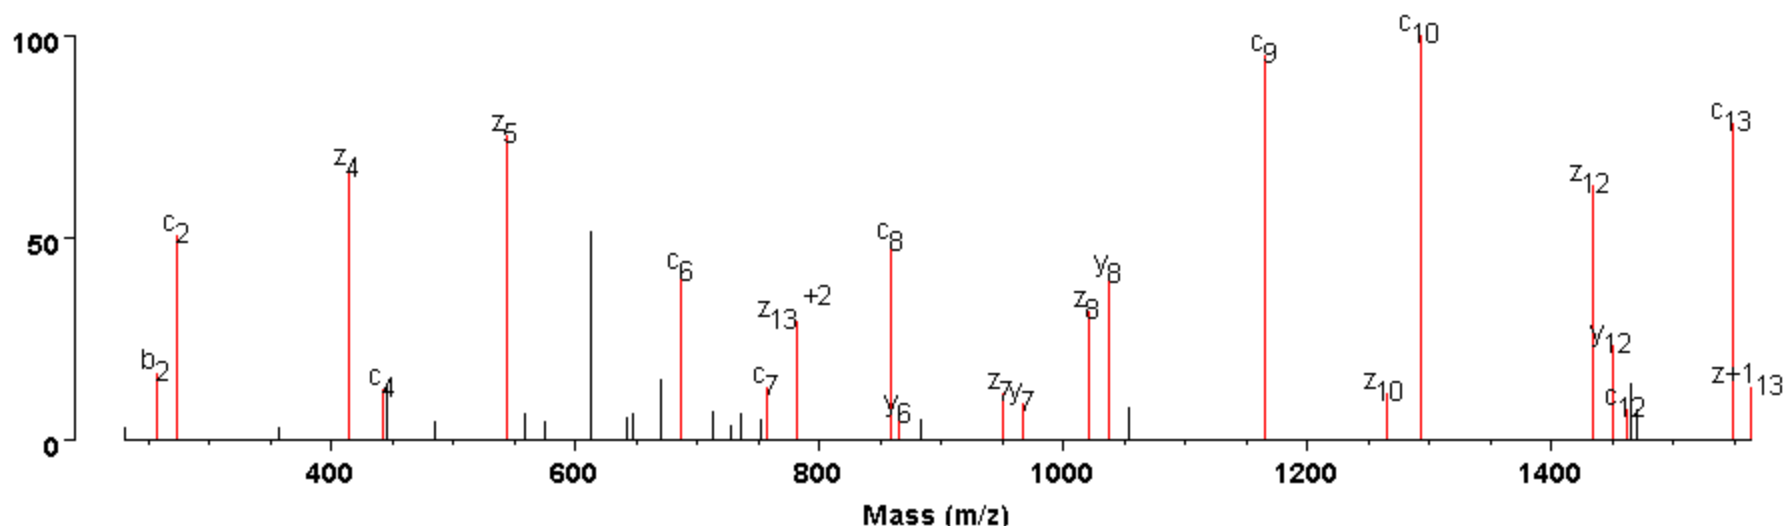

| MH <sup>+1</sup> (av) | MH <sup>+1</sup> (mono) | MH <sup>+2</sup> (av) | MH <sup>+2</sup> (mono) | MH <sup>+3</sup> (av) | MH <sup>+3</sup> (mono) |
|-----------------------|-------------------------|-----------------------|-------------------------|-----------------------|-------------------------|
| 1706.9266             | 1705.8214               | 853.9670              | 853.4143                | 569.6472              | 569.2786                |

## [-] Peak Matches

| 230.1730                     | 257.1602                    | 274.1867                     | 357.1863                    | 414.2212                    | 442.2765                    | 446.2110                    | 484.2502                     | 543.2637                                   | 575.2530                       |
|------------------------------|-----------------------------|------------------------------|-----------------------------|-----------------------------|-----------------------------|-----------------------------|------------------------------|--------------------------------------------|--------------------------------|
| 230.1730                     | 257.1602                    | 274.1867                     | 357.1863                    | 414.2212                    | 442.2765                    | 446.2110                    | 484.2502                     | 543.2637                                   | 575.2530                       |
|                              | <i>b<sub>2</sub></i> (-2.4) | <i>c<sub>2</sub></i> (-2.4)  |                             | <i>z<sub>4</sub></i> (-2.3) | <i>c<sub>4</sub></i> (-1.7) |                             |                              | <i>z<sub>5</sub></i> (-1.9)                |                                |
| 613.2925                     | 642.3842                    | 647.2810                     | 670.3787                    | 686.3970                    | 713.4205                    | 757.4342                    | 858.4800                     | 865.3687                                   | 883.4885                       |
| 613.2925                     | 642.3842                    | 647.2810                     | 670.3787                    | 686.3970                    | 713.4205                    | 757.4342                    | 858.4800                     | 865.3687                                   | 883.4885                       |
| w6                           |                             |                              |                             | <i>c<sub>6</sub></i> (-2.0) |                             | <i>c<sub>7</sub></i> (-1.8) | <i>c<sub>8</sub></i> (-3.7)  | <i>y<sub>6</sub></i> (-3.9)                |                                |
| 950.3987                     | 966.4172                    | 1021.4356                    | 1037.4546                   | 1053.4243                   | 559.2821 <sup>+2</sup>      | 1164.5691                   | 1265.5574                    | 1293.6112                                  | 1433.6451                      |
| 950.3987                     | 966.4172                    | 1021.4356                    | 1037.4546                   | 1053.4243                   | 1117.5569                   | 1164.5691                   | 1265.5574                    | 1293.6112                                  | 1433.6451                      |
| <i>z<sub>7</sub></i> (-2.3)  | <i>y<sub>7</sub></i> (-2.5) | <i>z<sub>8</sub></i> (-2.5)  | <i>y<sub>8</sub></i> (-2.1) |                             |                             | <i>c<sub>9</sub></i> (-2.3) | <i>z<sub>10</sub></i> (-1.5) | <i>c<sub>10</sub></i> (-2.4)               | <i>z<sub>12</sub></i> (-2.8)   |
| 1449.6639                    | 727.3712 <sup>+2</sup>      | 1461.6992                    | 1465.6362                   | 1470.7635                   | 735.8876 <sup>+2</sup>      | 751.8695 <sup>+2</sup>      | 1548.7319                    | 781.3744 <sup>+2</sup>                     | 1562.7479                      |
| 1449.6639                    | 1453.7352                   | 1461.6992                    | 1465.6362                   | 1470.7635                   | 1470.7680                   | 1502.7316                   | 1548.7319                    | 1561.7415                                  | 1562.7479                      |
| <i>y<sub>12</sub></i> (-2.7) |                             | <i>c<sub>12</sub></i> (-3.4) |                             |                             |                             |                             | <i>c<sub>13</sub></i> (-2.8) | <i>z<sub>13</sub></i> <sup>+2</sup> (-1.7) | <i>z+1<sub>13</sub></i> (-2.6) |

## LDFGQGS(HexNAc)GSPVC(Carbamidomethyl)LAQVK<sup>+2</sup>

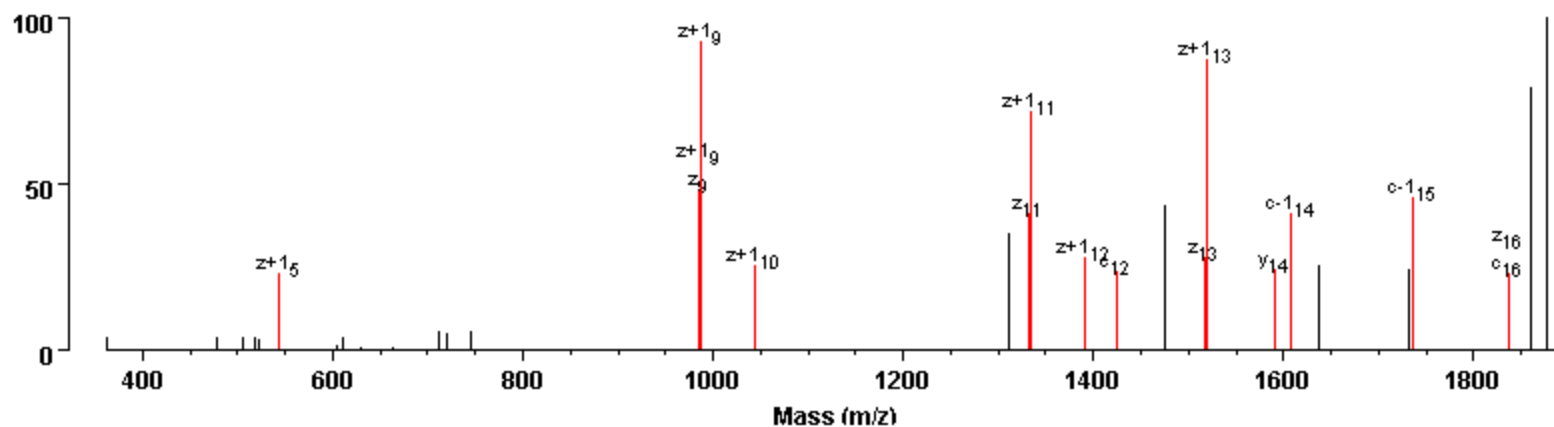

| MH <sup>+</sup> 1(av) | MH <sup>+</sup> 1(mono) | MH <sup>+</sup> 2(av) | MH <sup>+</sup> 2(mono) |
|-----------------------|-------------------------|-----------------------|-------------------------|
| 1967.2186             | 1965.9586               | 984.1130              | 983.4829                |

### [-] Peak Matches

| 361.3270  | 478.4100  | 505.2610     | 517.7150                | 521.3960    | 543.3550      | 603.3420  | 610.3990    | 629.3110      | 663.4130               |
|-----------|-----------|--------------|-------------------------|-------------|---------------|-----------|-------------|---------------|------------------------|
|           |           |              |                         |             | z+15(0.0049)  |           |             |               |                        |
| 711.6010  | 720.4410  | 744.3460     | 985.8490                | 986.5520    | 1043.6110     | 1310.5170 | 1332.6080   | 1333.6380     | 1390.5070              |
|           |           |              | z9(0.32)<br>z+19(-0.68) | z+19(0.018) | z+110(0.056)  |           | z11(-0.051) | z+111(-0.029) | z+112(-0.18)           |
| 1425.7370 | 1474.4510 | 1517.7350    | 1518.7530               | 1590.8830   | 1608.7190     | 1638.1760 | 1730.9030   | 1736.7500     | 1837.0530              |
| c12(0.11) |           | z13(-0.0040) | z+113(0.0062)           | y14(0.10)   | c-114(-0.026) |           |             | c-115(-0.053) | c16(0.17)<br>z16(0.20) |
| 1859.8980 | 1876.9580 | 1897.0270    |                         |             |               |           |             |               |                        |

**FPFGS(HexNAc)SC(Carbamidomethyl)TGTFHPAPSAPDK<sup>+3</sup>**

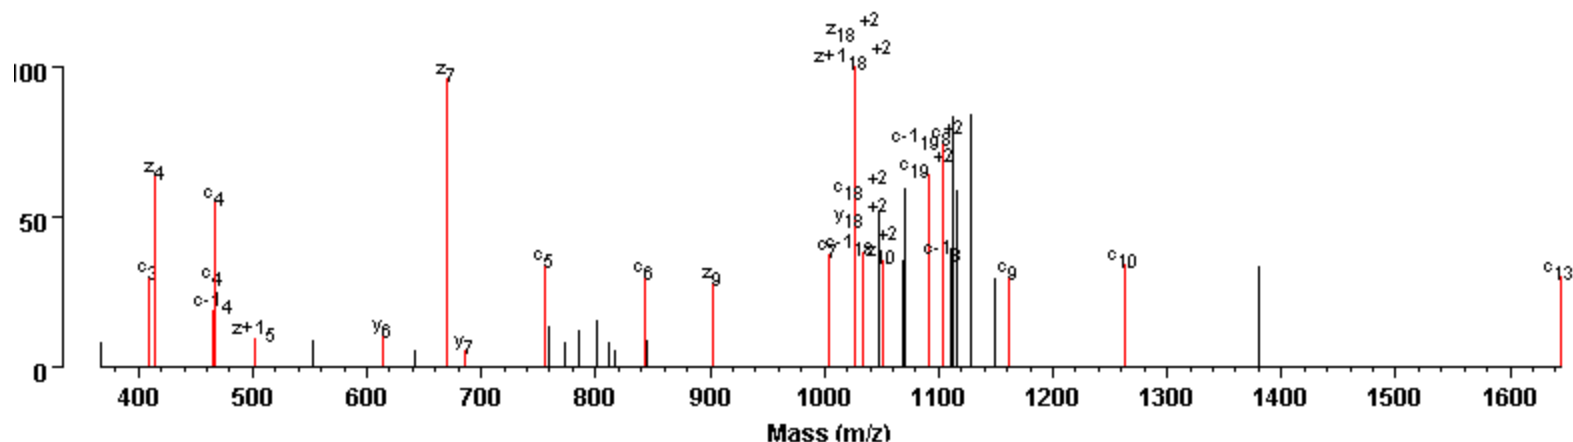

| MH <sup>+1</sup> (av) | MH <sup>+1</sup> (mono) | MH <sup>+2</sup> (av) | MH <sup>+2</sup> (mono) | MH <sup>+3</sup> (av) | MH <sup>+3</sup> (mono) |
|-----------------------|-------------------------|-----------------------|-------------------------|-----------------------|-------------------------|
| 2312.5351             | 2311.0336               | 1156.7713             | 1156.0204               | 771.5166              | 771.0160                |

**[-] Peak Matches**

|                        |                         |                                                                                 |                                                                                                                          |                        |                          |                         |                          |                                                                                |                          |
|------------------------|-------------------------|---------------------------------------------------------------------------------|--------------------------------------------------------------------------------------------------------------------------|------------------------|--------------------------|-------------------------|--------------------------|--------------------------------------------------------------------------------|--------------------------|
| 366.3130               | 409.3820                | 414.3060                                                                        | 465.5430                                                                                                                 | 466.3360               | 502.3570                 | 552.4280                | 614.3650                 | 642.5390                                                                       | 669.4480                 |
|                        | c <sub>3</sub> (0.16)   | z <sub>4</sub> (0.095)                                                          | c-1 <sub>4</sub> (0.31)<br>c <sub>4</sub> (-0.70)                                                                        | c <sub>4</sub> (0.091) | z+1 <sub>5</sub> (0.11)  |                         | y <sub>6</sub> (0.051)   |                                                                                | z <sub>7</sub> (0.12)    |
| 685.5650               | 756.3360                | 758.5800                                                                        | 773.0420                                                                                                                 | 786.0310               | 800.4170                 | 811.5690                | 816.6280                 | 843.3780                                                                       | 845.2560                 |
| y <sub>7</sub> (0.21)  | c <sub>5</sub> (-0.020) |                                                                                 |                                                                                                                          |                        |                          |                         |                          | c <sub>6</sub> (-0.010)                                                        |                          |
| 903.4820               | 1003.3980               | 1026.2660                                                                       | 1033.6010                                                                                                                | 1047.6730              | 1050.4970                | 1069.5130               | 1070.4660                | 1091.6400                                                                      | 1103.2840                |
| z <sub>9</sub> (0.038) | c <sub>7</sub> (-0.021) | z+1 <sub>18</sub> <sup>+2</sup> (-0.19)<br>z <sub>18</sub> <sup>+2</sup> (0.32) | c-1 <sub>18</sub> <sup>+2</sup> (0.14)<br>y <sub>18</sub> <sup>+2</sup> (-0.36)<br>c <sub>18</sub> <sup>+2</sup> (-0.37) |                        | z <sub>10</sub> (-0.016) |                         |                          | c <sub>19</sub> <sup>+2</sup> (0.16)<br>c-1 <sub>19</sub> <sup>+2</sup> (0.66) | c-1 <sub>8</sub> (-0.17) |
| 1104.3660              | 1110.8630               | 1111.7760                                                                       | 1115.7130                                                                                                                | 1128.5670              | 1149.7890                | 1161.4690               | 1262.4980                | 1379.8270                                                                      | 1643.6400                |
| c <sub>8</sub> (-0.10) |                         |                                                                                 |                                                                                                                          |                        |                          | c <sub>9</sub> (-0.019) | c <sub>10</sub> (-0.038) | w14                                                                            | c <sub>13</sub> (-0.076) |

**FPFGSS(HexNAc)C(Carbamidomethyl)TGTFHPAPSAPDK<sup>+3</sup>**

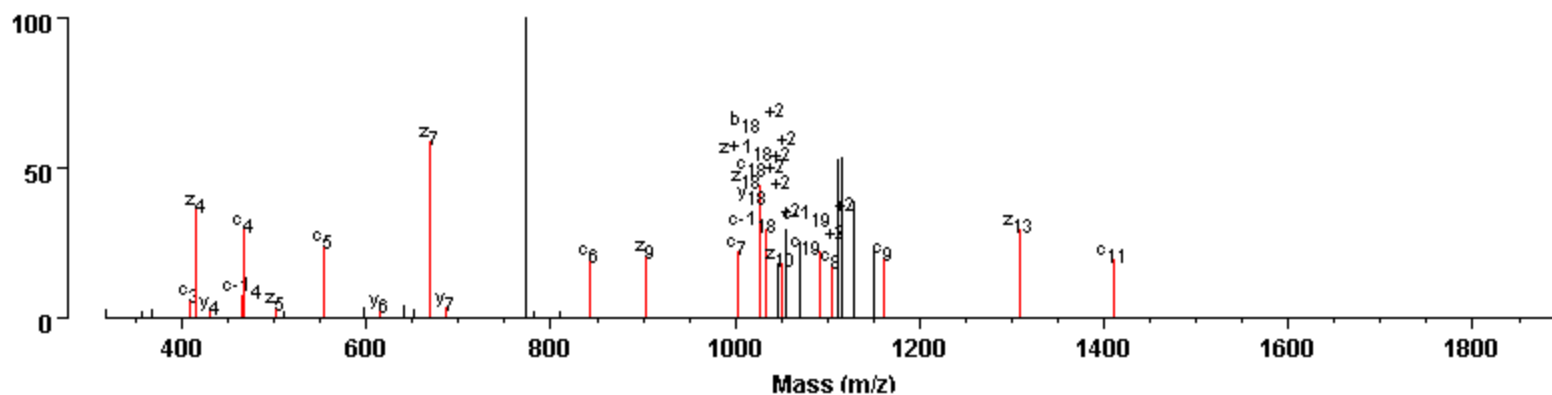

| MH <sup>+1</sup> (av) | MH <sup>+1</sup> (mono) | MH <sup>+2</sup> (av) | MH <sup>+2</sup> (mono) | MH <sup>+3</sup> (av) | MH <sup>+3</sup> (mono) |
|-----------------------|-------------------------|-----------------------|-------------------------|-----------------------|-------------------------|
| 2312.5351             | 2311.0336               | 1156.7713             | 1156.0204               | 771.5166              | 771.0160                |

**[ - ] Peak Matches**

| 316.2680               | 357.3900               | 366.3410                | 409.3500                                                                                                               | 414.3240                                                                                                                | 430.3440                 | 465.2000                  | 466.3310                  | 501.4210                | 510.3470                                                                        |
|------------------------|------------------------|-------------------------|------------------------------------------------------------------------------------------------------------------------|-------------------------------------------------------------------------------------------------------------------------|--------------------------|---------------------------|---------------------------|-------------------------|---------------------------------------------------------------------------------|
|                        |                        |                         | c <sub>3</sub> (0.13)                                                                                                  | z <sub>4</sub> (0.11)                                                                                                   | y <sub>4</sub> (0.11)    | c <sub>-14</sub> (-0.037) | c <sub>4</sub> (0.086)    | z <sub>5</sub> (0.18)   |                                                                                 |
| 553.3380               | 597.2920               | 614.3770                | 640.4390                                                                                                               | 652.3400                                                                                                                | 669.3240                 | 685.4680                  | 772.2940                  | 781.6040                | 809.5640                                                                        |
| c <sub>5</sub> (0.061) |                        | y <sub>6</sub> (0.063)  |                                                                                                                        |                                                                                                                         | z <sub>7</sub> (-0.0088) | y <sub>7</sub> (0.12)     |                           |                         |                                                                                 |
| 843.4030               | 903.4860               | 1003.3770               | 1026.1930                                                                                                              | 1033.6970                                                                                                               | 1046.6600                | 1050.5060                 | 1055.8500                 | 1069.6780               | 1091.4120                                                                       |
| c <sub>6</sub> (0.015) | z <sub>9</sub> (0.042) | c <sub>7</sub> (-0.042) | z <sub>18</sub> <sup>+2</sup> (0.24)<br>z <sub>+18</sub> <sup>+2</sup> (-0.26)<br>b <sub>18</sub> <sup>+2</sup> (0.74) | c <sub>-18</sub> <sup>+2</sup> (0.23)<br>y <sub>18</sub> <sup>+2</sup> (-0.26)<br>c <sub>18</sub> <sup>+2</sup> (-0.27) |                          |                           | z <sub>10</sub> (-0.0069) |                         | c <sub>19</sub> <sup>+2</sup> (-0.069)<br>c <sub>-19</sub> <sup>+2</sup> (0.43) |
| 1104.7640              | 1111.4910              | 1112.1080               | 1115.7350                                                                                                              | 1128.4580                                                                                                               | 1149.5050                | 1161.5660                 | 1309.6950                 | 1409.6790               | 1899.8690                                                                       |
| c <sub>8</sub> (0.30)  |                        |                         |                                                                                                                        |                                                                                                                         |                          | c <sub>9</sub> (0.078)    | z <sub>13</sub> (0.065)   | c <sub>11</sub> (0.075) |                                                                                 |

## MC(Carbamidomethyl)AALNS(HexNAc)MDQYGGR<sup>+2</sup>

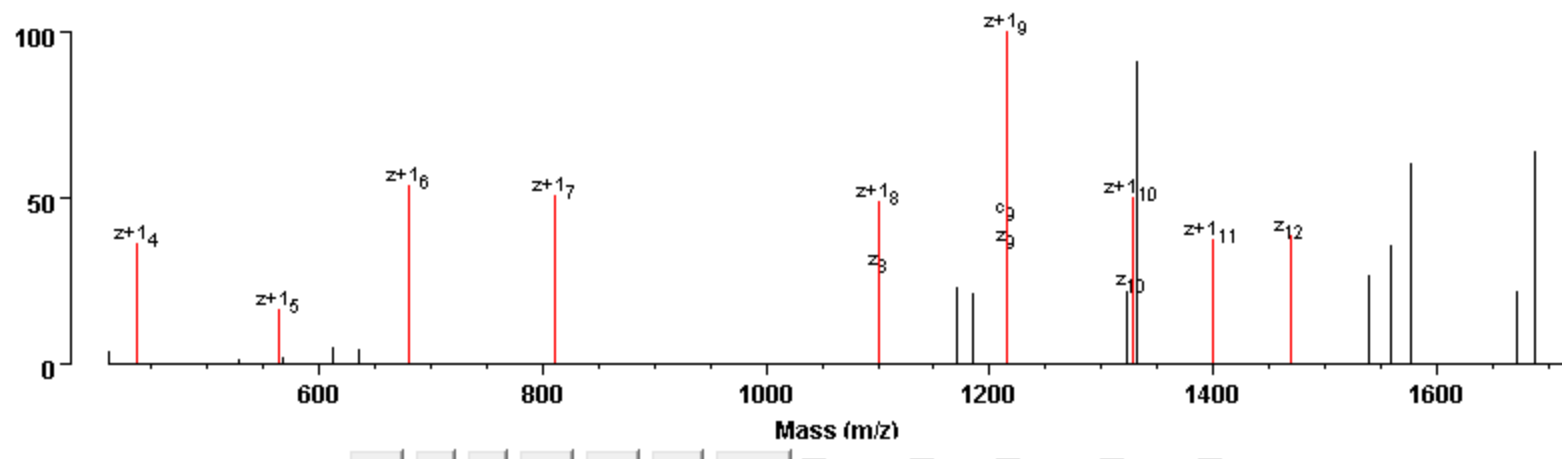

Elemental Composition: [C70 H114 N21 O27 S3](#)

| MH <sup>+</sup> 1(av) | MH <sup>+</sup> 1(mono) | MH <sup>+</sup> 2(av) | MH <sup>+</sup> 2(mono) |
|-----------------------|-------------------------|-----------------------|-------------------------|
| 1778.0036             | 1776.7350               | 889.5055              | 888.8711                |

### [ - ] Peak Matches

|             |            |           |                      |               |           |            |               |            |              |
|-------------|------------|-----------|----------------------|---------------|-----------|------------|---------------|------------|--------------|
| 411.6260    | 437.3740   | 529.5180  | 565.3280             | 567.3720      | 612.5470  | 636.5120   | 680.4120      | 811.4750   | 1100.5150    |
|             | z+14(0.16) |           | z+15(0.055)          |               |           |            | z+16(0.11)    | z+17(0.13) | z8(0.071)    |
| 1101.5260   | 1170.9160  | 1184.8830 | 1214.5880            | 1215.4930     | 1323.4250 | 1327.6050  | 1328.5370     | 1331.6040  | 1399.6640    |
| z+18(0.074) |            |           | z9(0.10)<br>c9(0.10) | z+19(-0.0016) |           | z10(0.034) | z+110(-0.042) |            | z+111(0.048) |
| 1469.6840   | 1539.6730  | 1558.7920 | 1575.6380            | 1670.5870     | 1687.8580 | 1716.7740  |               |            |              |
| z12(0.039)  | w13        |           |                      |               |           |            |               |            |              |

# S Figure 25

Estimating the relative amount of **(1)**FPFGSSC(Carbamidomethyl)T(GlcNAc)GTFHPAPSAPDK and **(2)**FPFGSSC(GlcNAc)TGTFHPAPSAPDK from the LC/MS data of a WGA-enriched but further not fractionated mouse synaptosome glycopeptide mixture

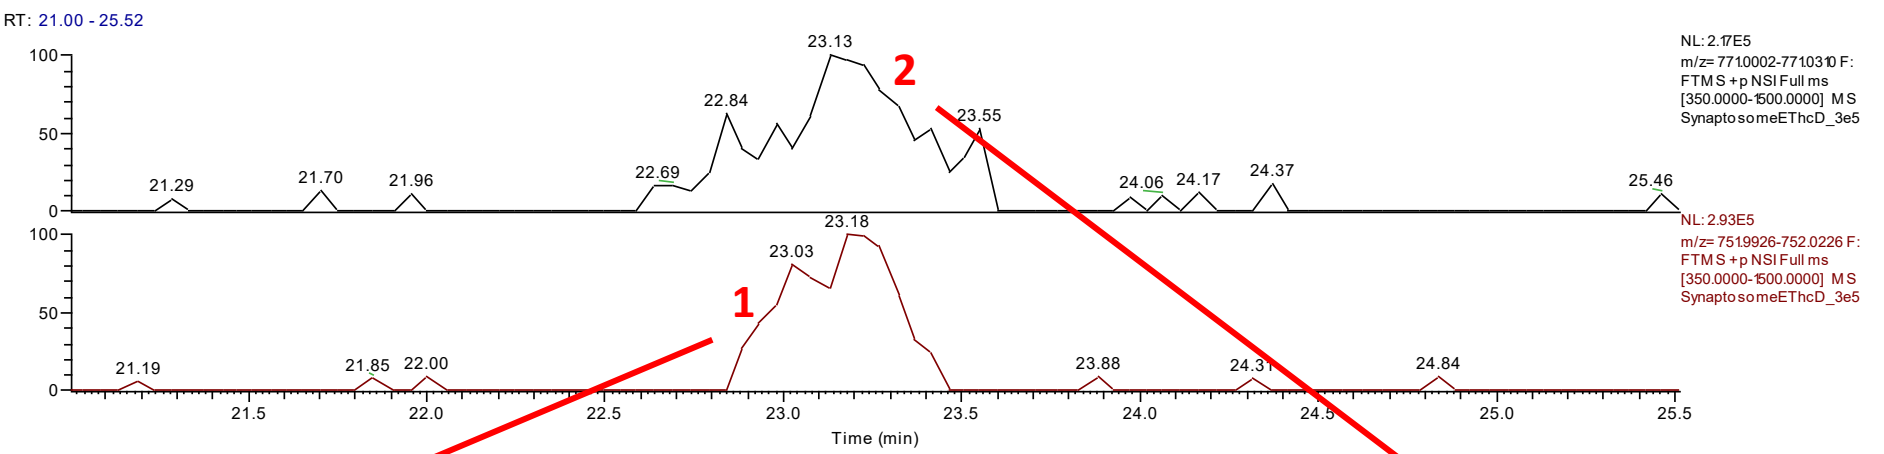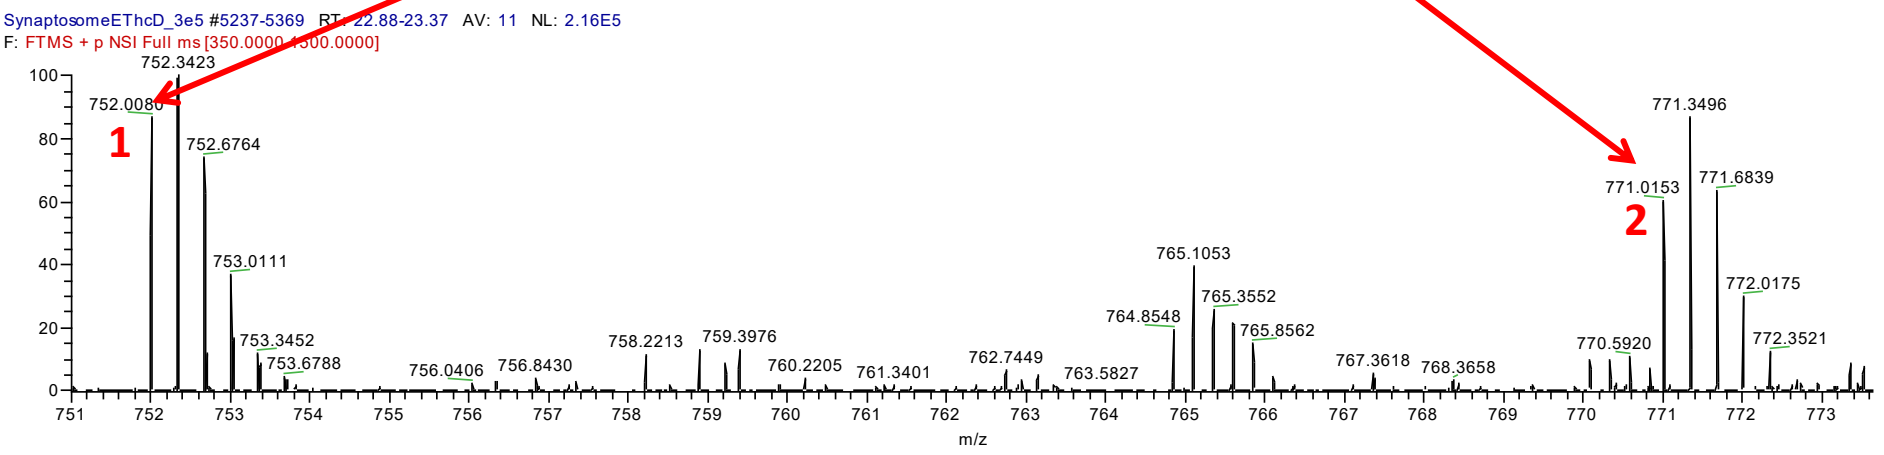



RAC(GlcNAc)AAGTPAVIR

Cys-1139

Human

V20110517-09 #2813 RT: 22.82 AV:  
T: FTMS + c NSI d Full ms2 463.58@h

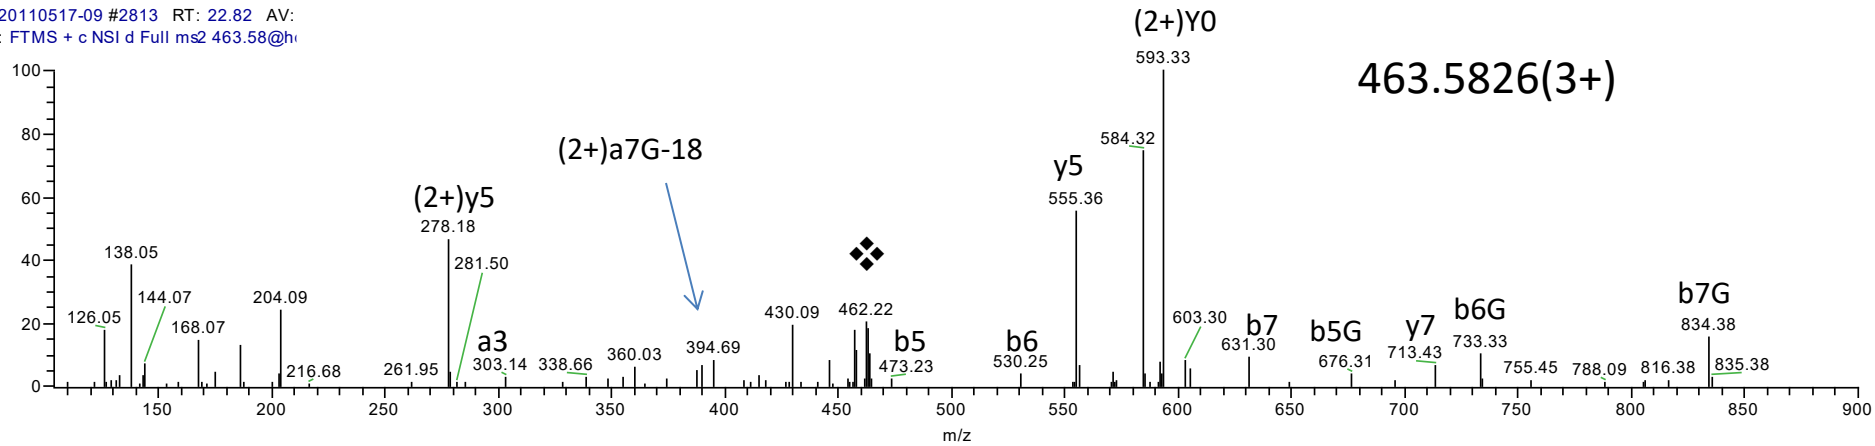

V20110517-09 #2814 RT: 22.83 AV: 1 NL: 4.17E3  
T: ITMS + c NSI d sa Full ms2 463.58@etd100.00 [50.00-1405.00]

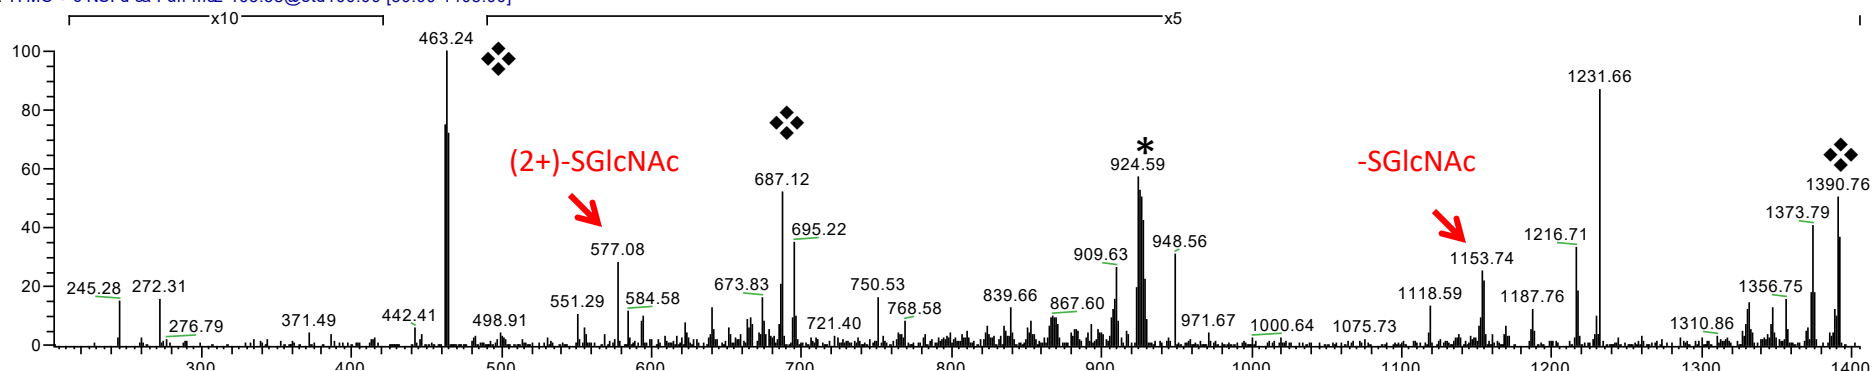

[-] Peak Matches

|                       |          |                       |                       |                        |                         |                       |                       |                                                     |                         |
|-----------------------|----------|-----------------------|-----------------------|------------------------|-------------------------|-----------------------|-----------------------|-----------------------------------------------------|-------------------------|
| 245.2810              | 260.2860 | 272.3070              | 276.7880              | 371.4900               | 386.4300                | 415.3410              | 429.3400              | 442.4120                                            | 446.2080                |
| c <sub>2</sub> (0.11) |          | z <sub>2</sub> (0.12) |                       | z <sub>3</sub> (0.24)  |                         |                       |                       | z <sub>4</sub> (0.12)                               |                         |
| 453.2990              | 472.9240 | 475.4640              | 481.9580              | 488.3840               | 498.9110                | 514.0640              | 530.3490              | 551.2880                                            | 555.3700                |
|                       |          |                       |                       |                        |                         |                       |                       | b <sub>10</sub> <sup>+</sup> z <sub>2</sub> (0.016) | y <sub>5</sub> (0.0087) |
|                       |          |                       |                       |                        |                         |                       |                       | c <sub>3</sub> (0.026)                              |                         |
| 577.0810              | 584.5790 | 594.1340              | 622.4320              | 640.4630               | 664.1320                | 750.5270              | 768.5790              | 839.6640                                            | 852.6380                |
|                       |          |                       | c <sub>4</sub> (0.13) | z <sub>6</sub> (0.073) |                         | c <sub>6</sub> (0.17) | z <sub>8</sub> (0.13) | z <sub>9</sub> (0.18)                               |                         |
| 867.6030              | 892.6370 | 909.6330              | 924.5920              | 948.5600               | 1118.5940               | 1153.7350             | 1187.7620             | 1216.7080                                           | 1231.6650               |
|                       |          | w10                   |                       | c <sub>8</sub> (0.10)  | c <sub>10</sub> (0.030) |                       |                       | z <sub>11</sub> (0.095)                             | c <sub>11</sub> (0.017) |

S Figure 27A

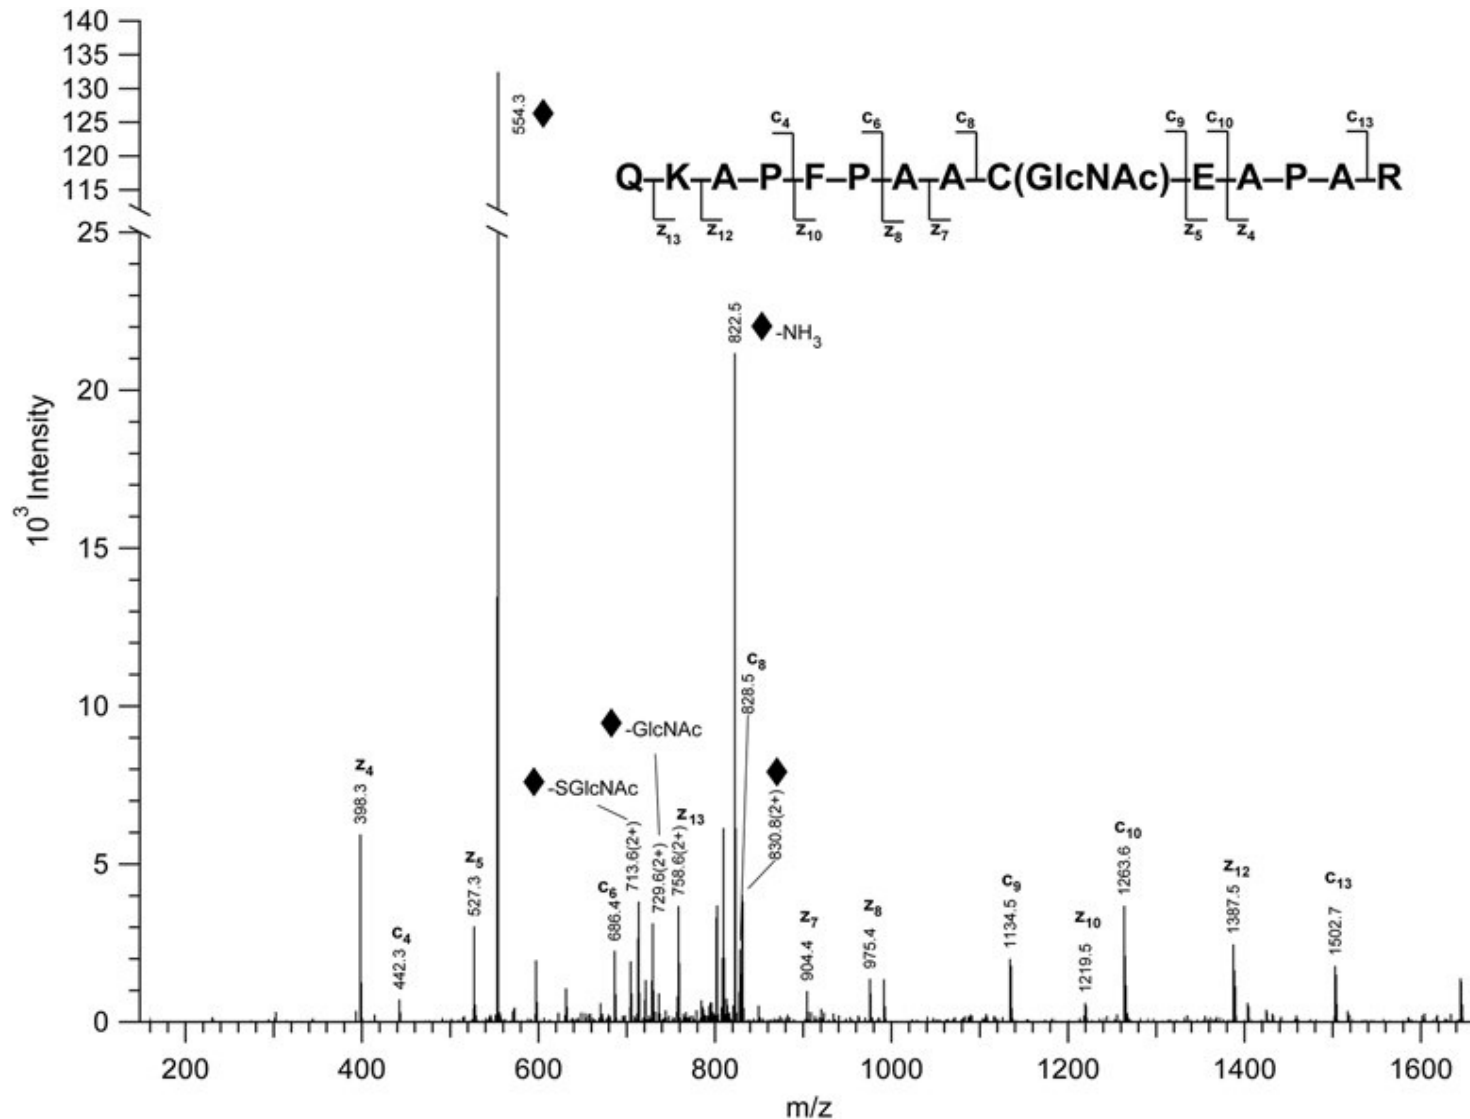

A) ETD spectrum of synthetic peptide QKAPFPAACEAPAR. ‘◆’ labels the precursor ion and its charge-reduced form. The insert shows the bond cleavages detected.

S Figure 27B

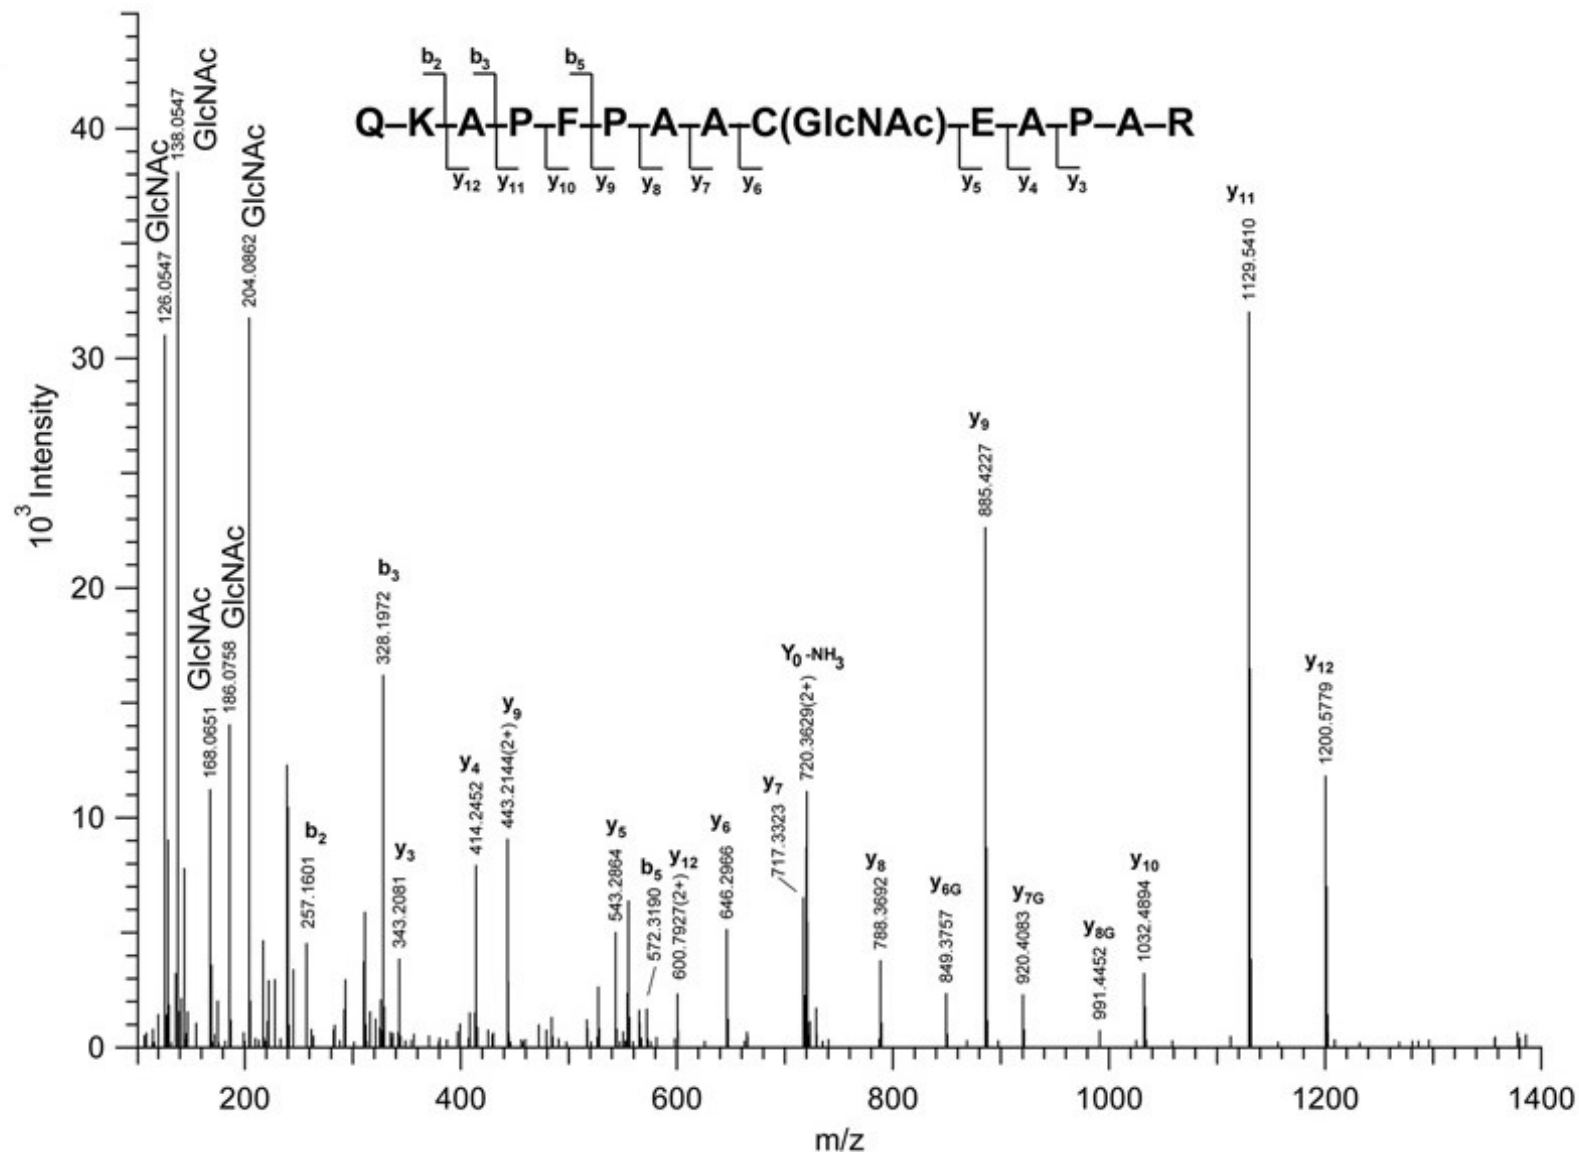

B) HCD spectrum of synthetic peptide QKAPFPAACEAPAR. The insert shows the bond cleavages detected. y ions containing GlcNac are labeled with a G.

S Figure 28A

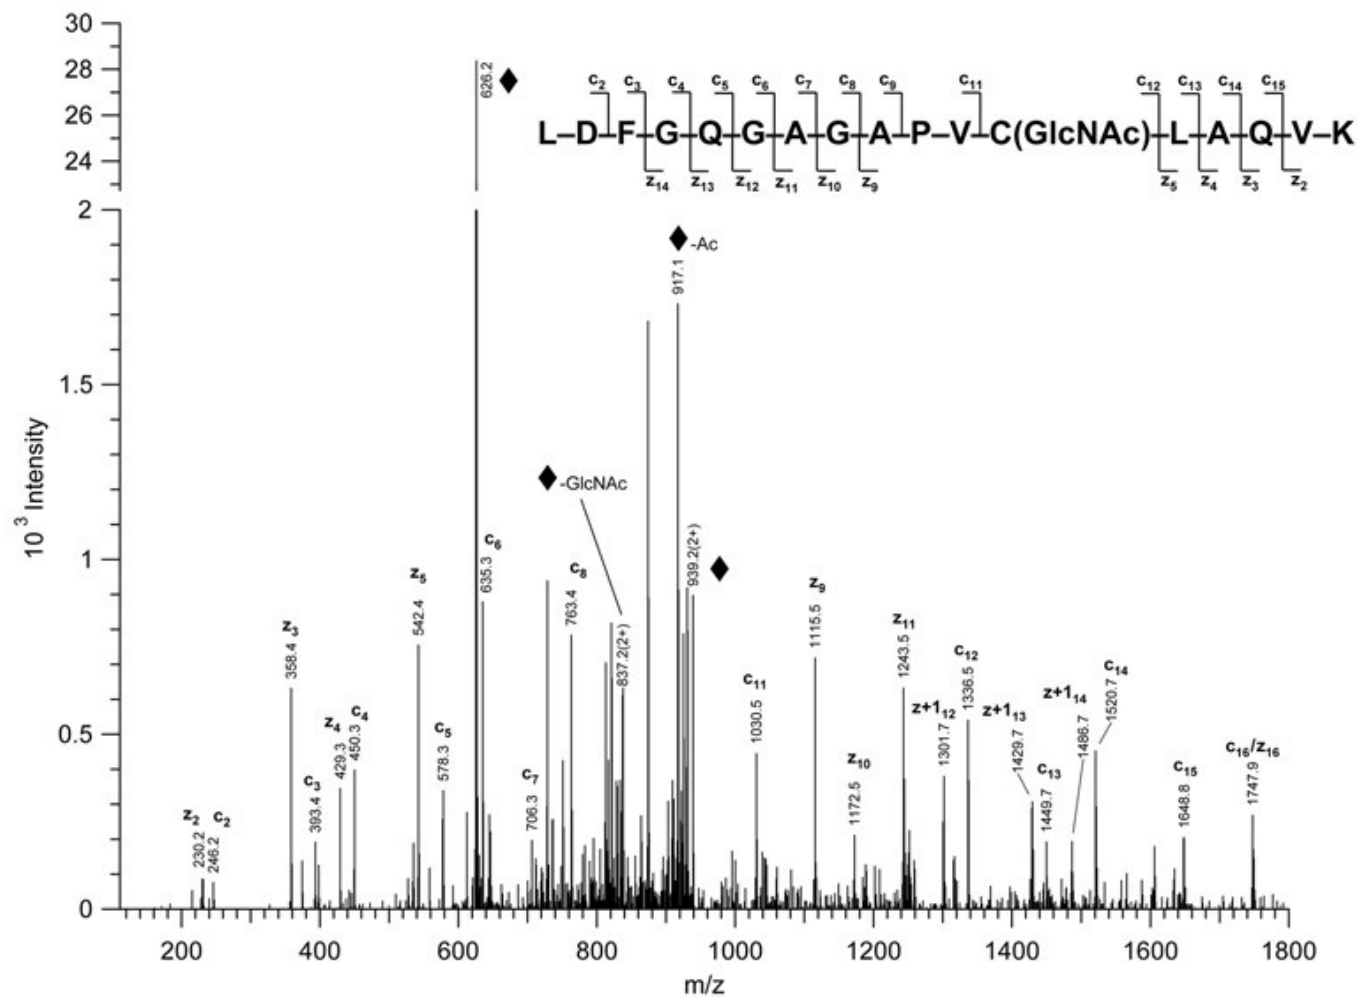

A) ETD spectrum of synthetic peptide LDFGQGAGAPVCLAQVK. ‘♦’ labels the precursor ion and its charge-reduced form. The insert shows the bond cleavages detected.

S Figure 28B

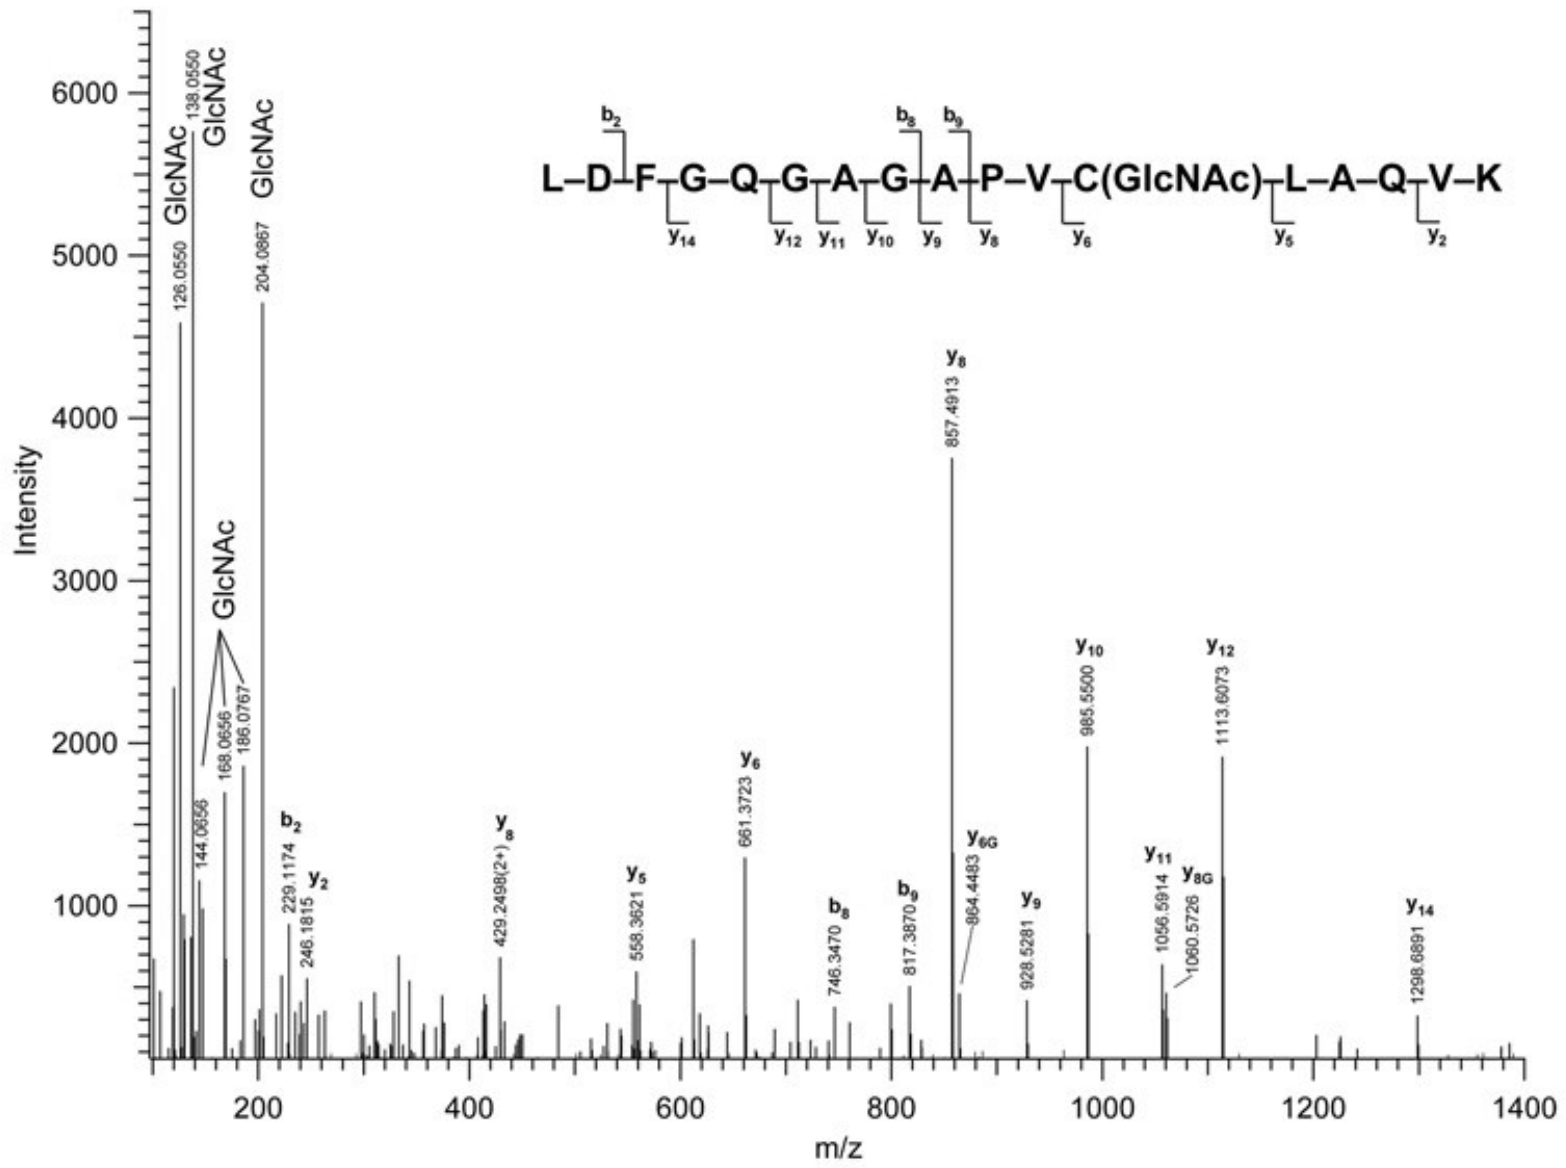

B) HCD spectrum of synthetic peptide QKAPFPAACEAPAR. The insert shows the bond cleavages detected. y ions containing GlcNAc are labeled with a G.

# S Figure 29A

V20151021-13 #2183-2285 RT: 21.92-22.62 AV: 15 NL: 6.39E7  
 T: FTMS + p NSI Full ms [350.00-1600.00]

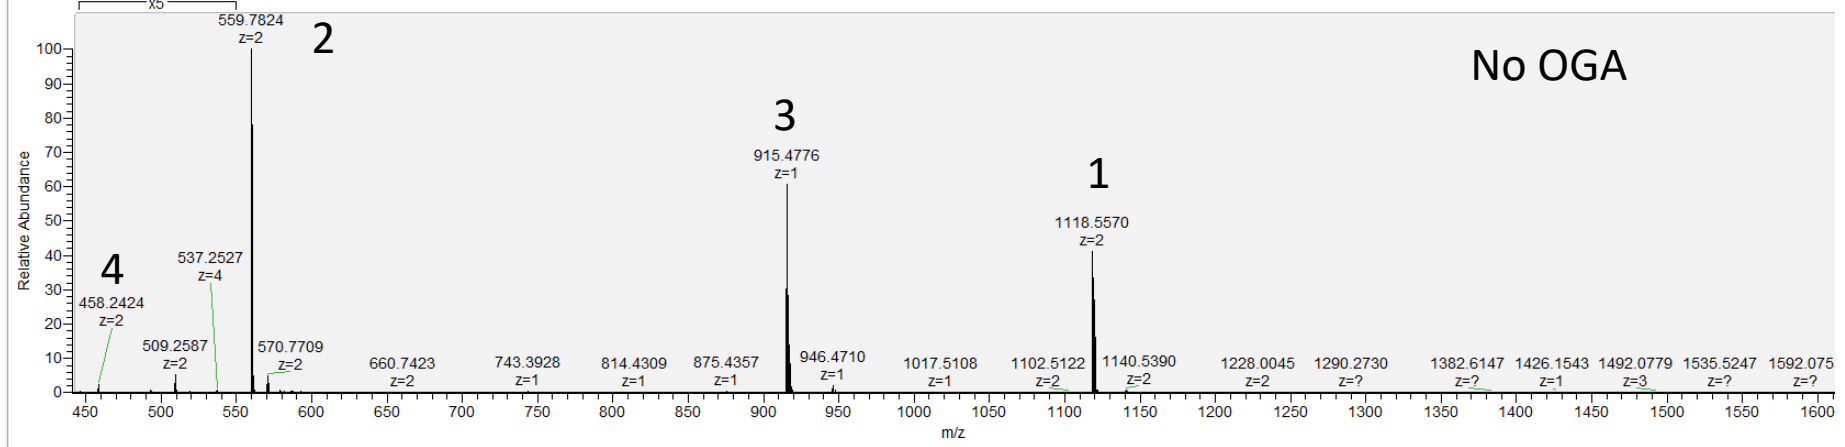

No OGA

RT: 20.9966 - 23.1981

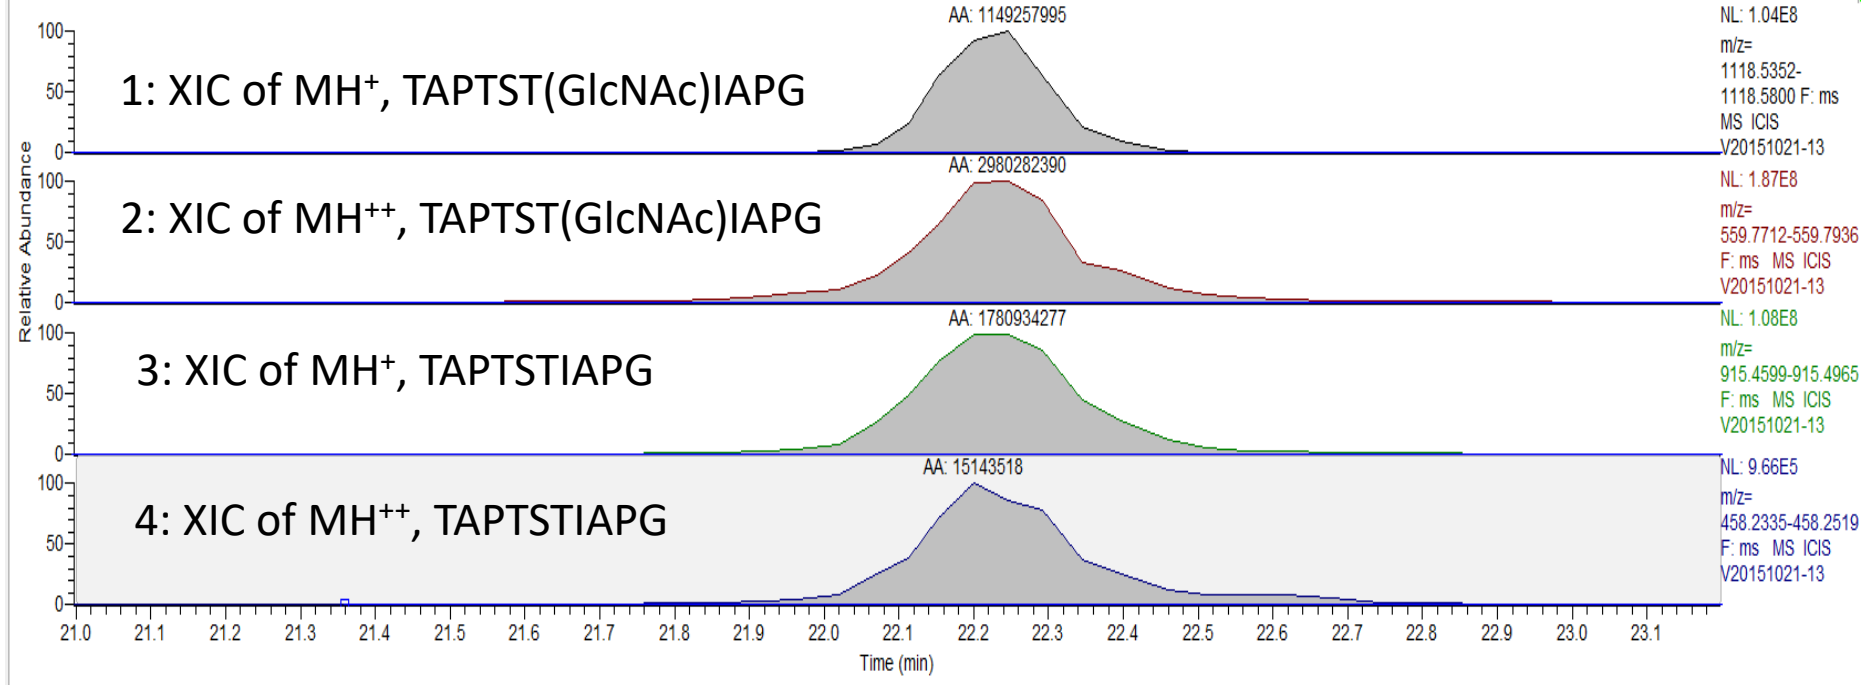

A) Mass spectrum across XIC peaks and extracted ion chromatograms of control peptide TAPTS(GlcNAc)TIAPG (modified and unmodified) after incubation with no OGA. Spectrum peaks are labeled to match XIC peaks. Peak areas are labeled above XIC peaks.

# S Figure 29B

V20151021-11 #2237-2349 RT: 21.82-22.74 AV: 16 NL: 4.88E7  
 T: FTMS + p NSI Full ms [350.00-1600.00]

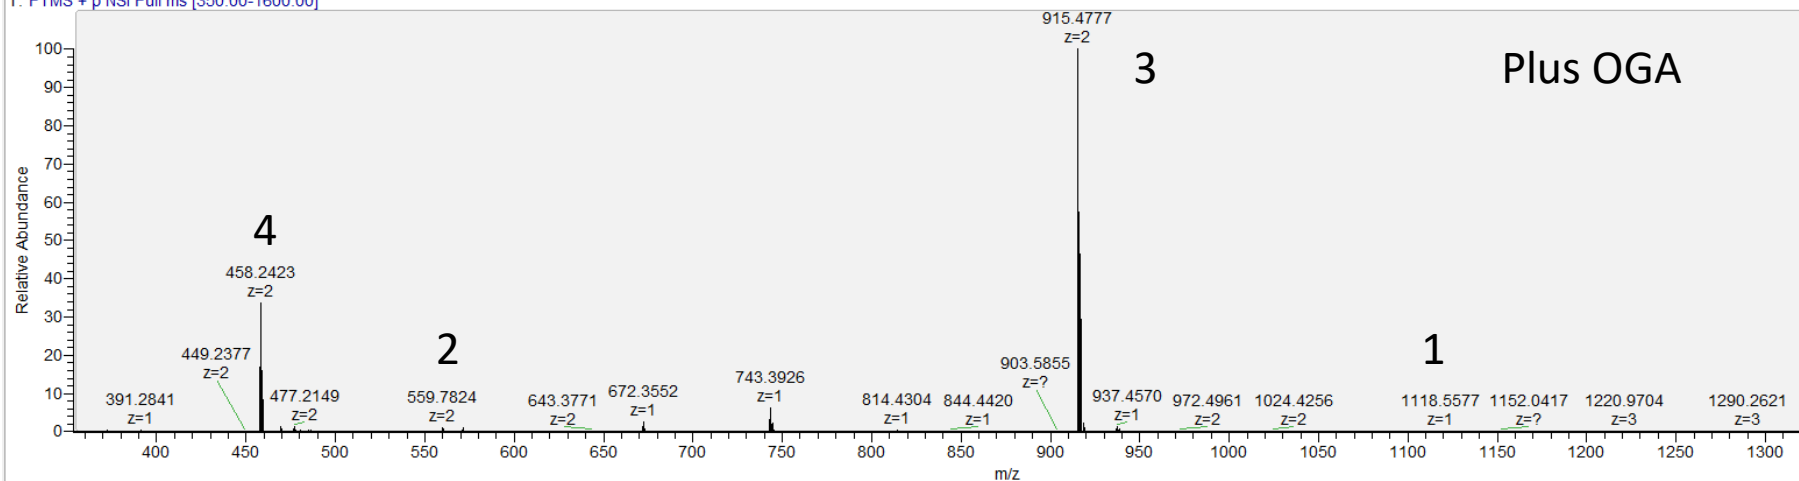

Plus OGA

RT: 20.9984 - 23.6073

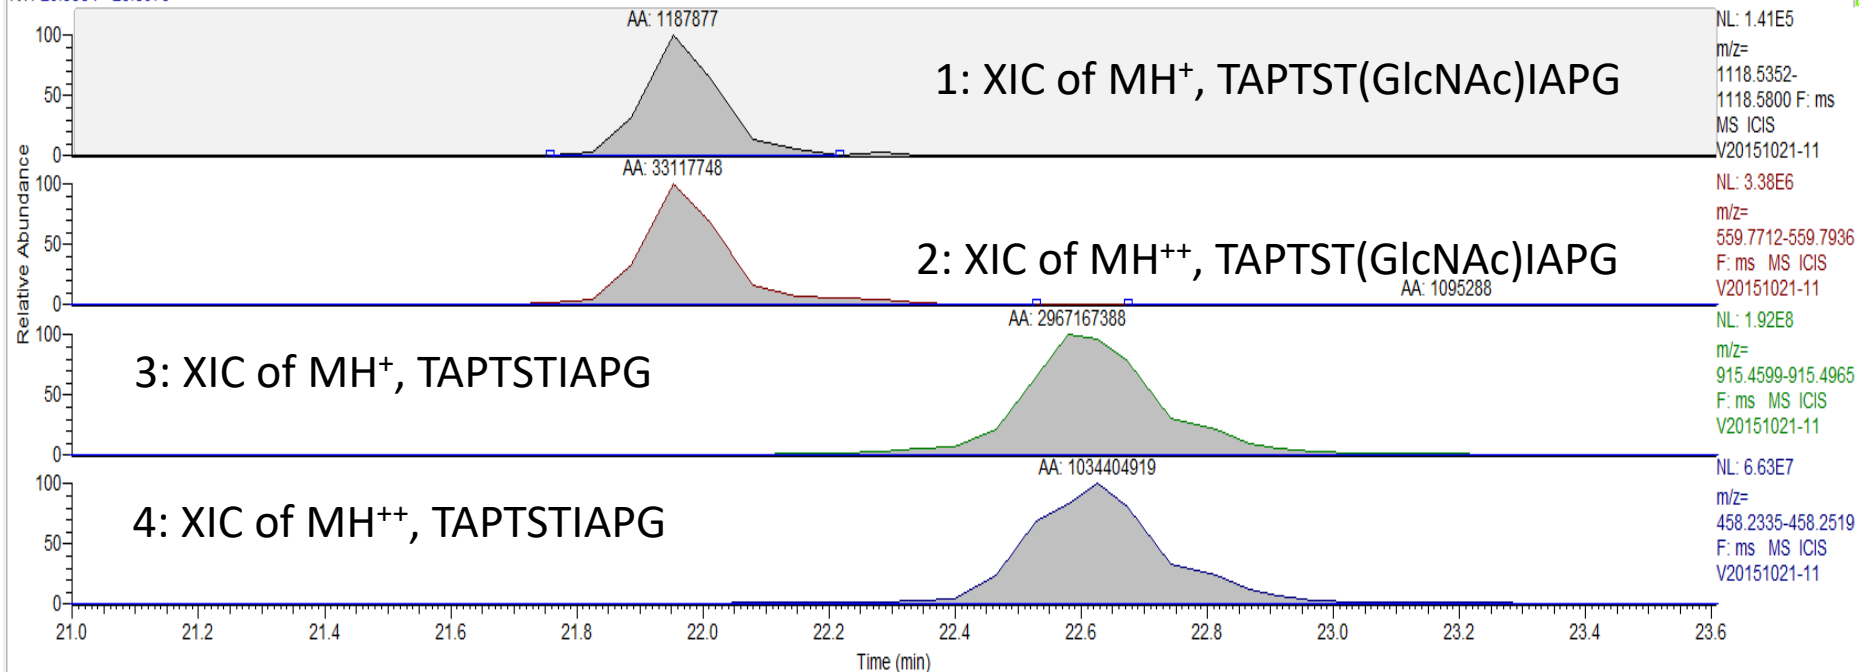

B) Mass spectrum across XIC peaks and extracted ion chromatograms of control peptide TAPTS(GlcNAc)TIAPG (modified and unmodified) after incubation with OGA. Spectrum peaks are labeled to match XIC peaks. Peak areas are labeled above XIC peaks.

# S Figure 29C

V20160413-03 #1089-1529 RT: 12.59-17.22 AV: 130 NL: 6.29E4  
 T: FTMS + p NSI Full ms [350.00-1600.00]

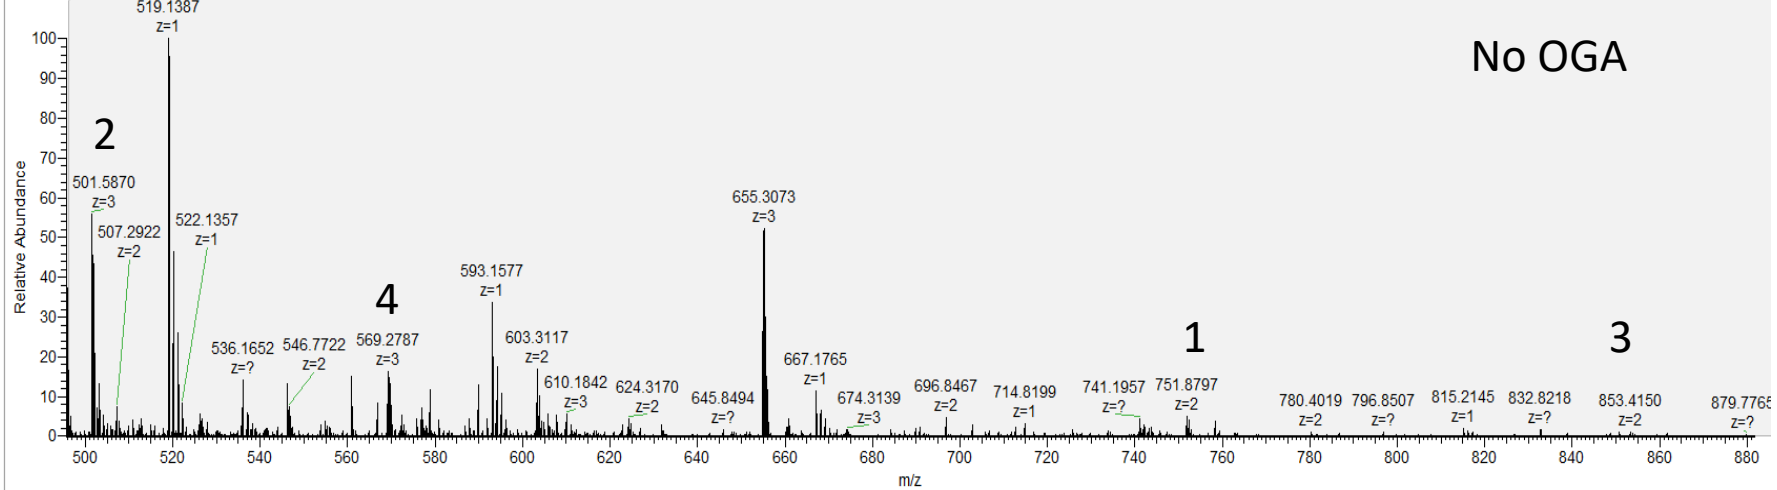

No OGA

RT: 8.7948 - 20.1023

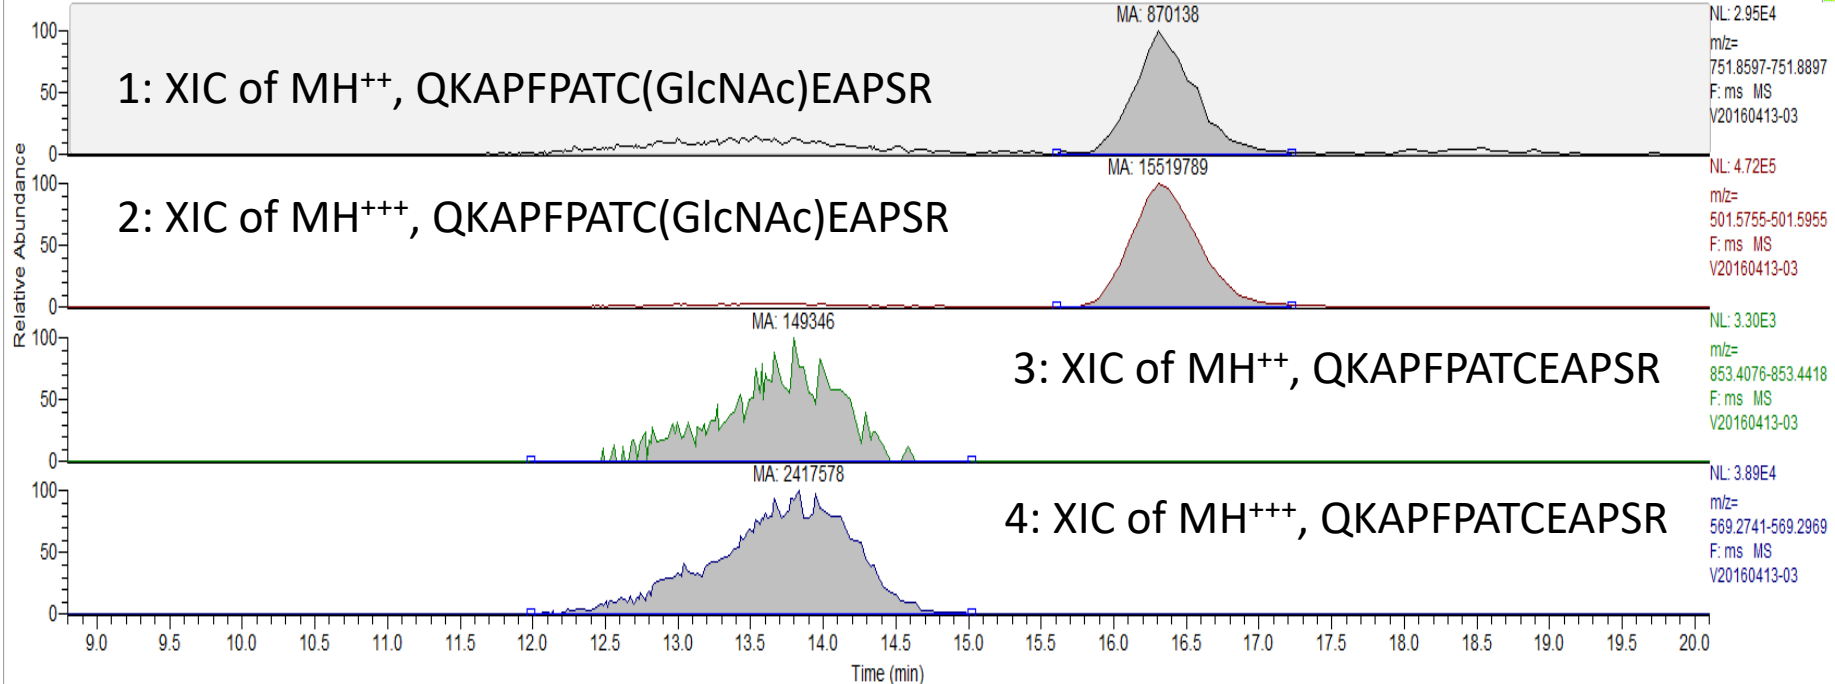

C) Mass spectrum across XIC peaks and extracted ion chromatograms of control peptide QKAPFPATC(GlcNAc)EAPSR (modified and unmodified) after incubation with no OGA. Spectrum peaks are labeled to match XIC peaks. Peak areas are labeled above XIC peaks.



# S Figure 29D

V20160413-07 #1144-1635 RT: 12.22-17.31 AV: 127 NL: 1.69E5  
 T: FTMS + p NSI Full ms [350.00-1600.00]

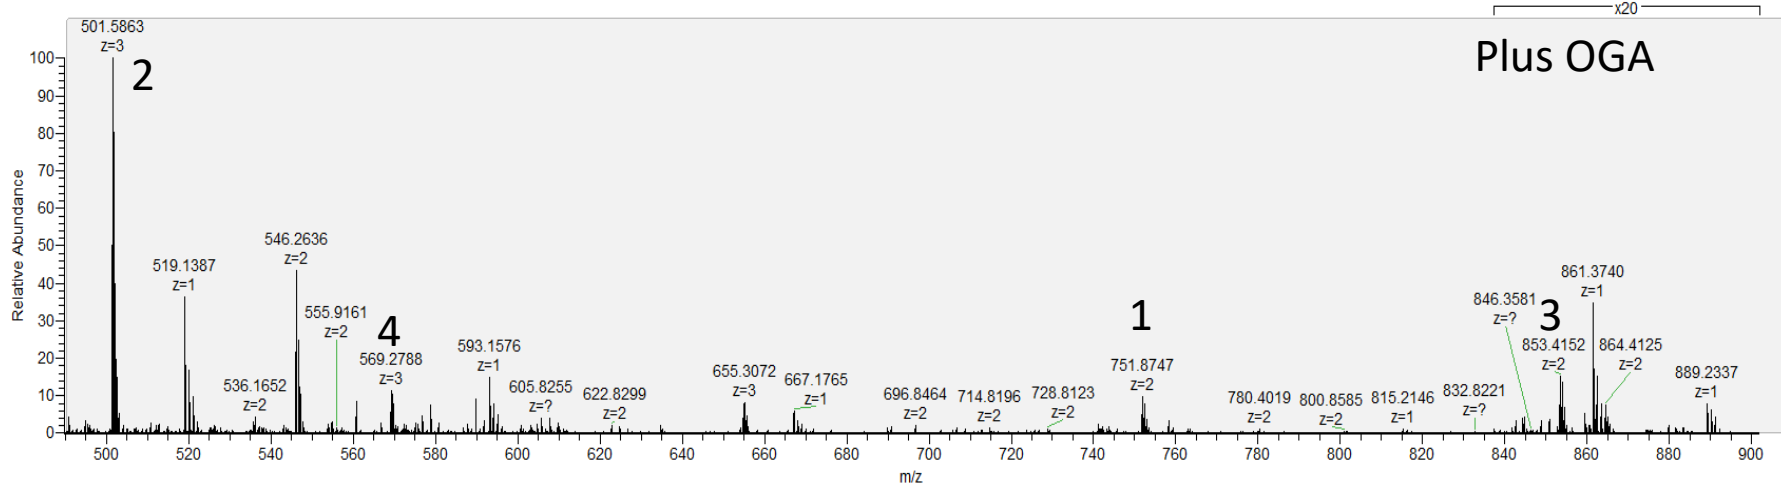

RT: 9.1088 - 21.7774

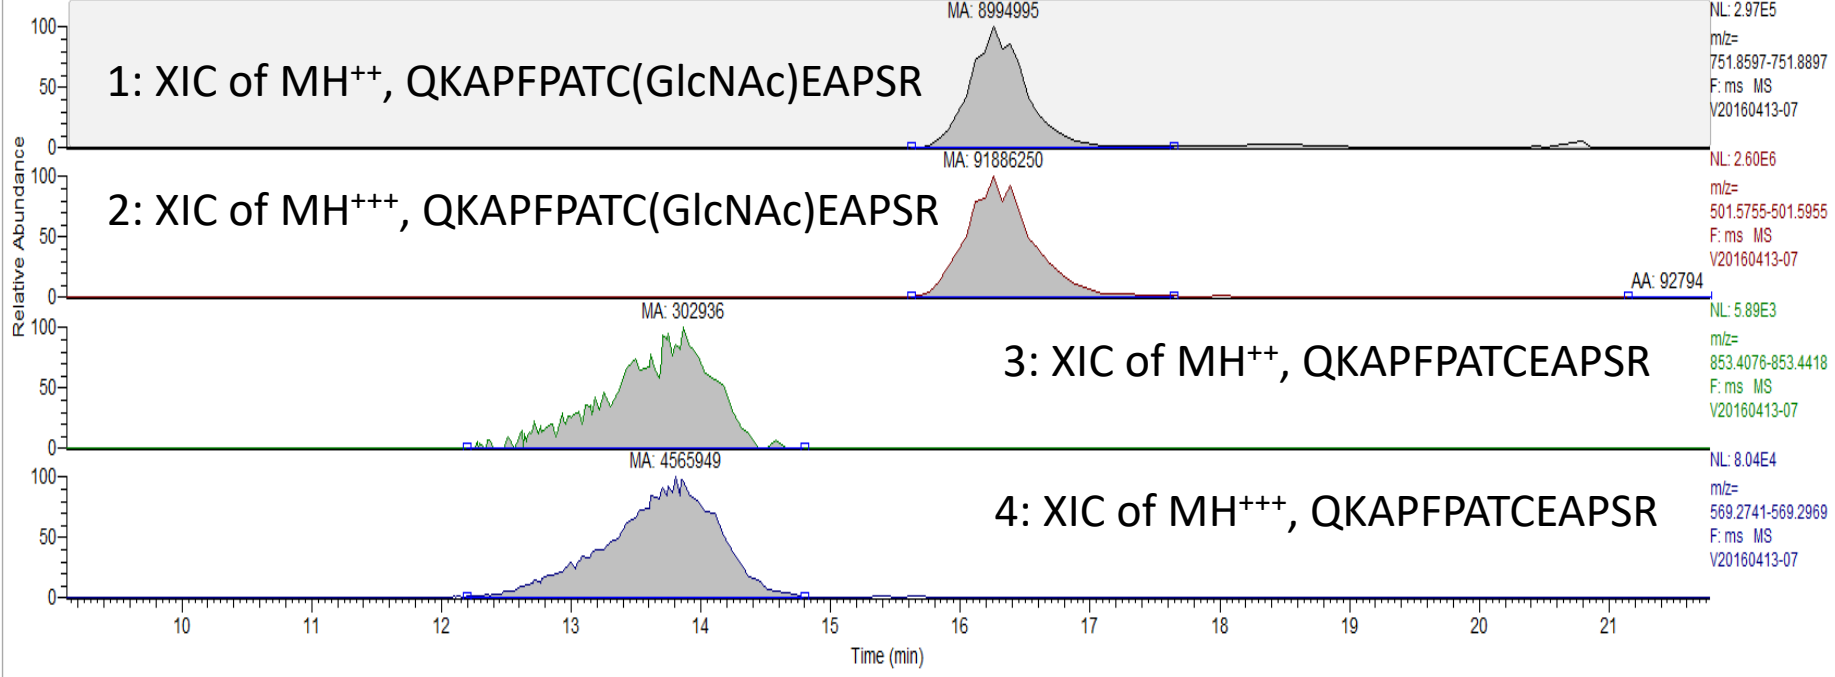

D) Mass spectrum across XIC peaks and extracted ion chromatograms of control peptide QKAPFPATC(GlcNAc)EAPSR (modified and unmodified) after incubation with OGA. Spectrum peaks are labeled to match XIC peaks. Peak areas are labeled above XIC peaks.

S Figure 29E

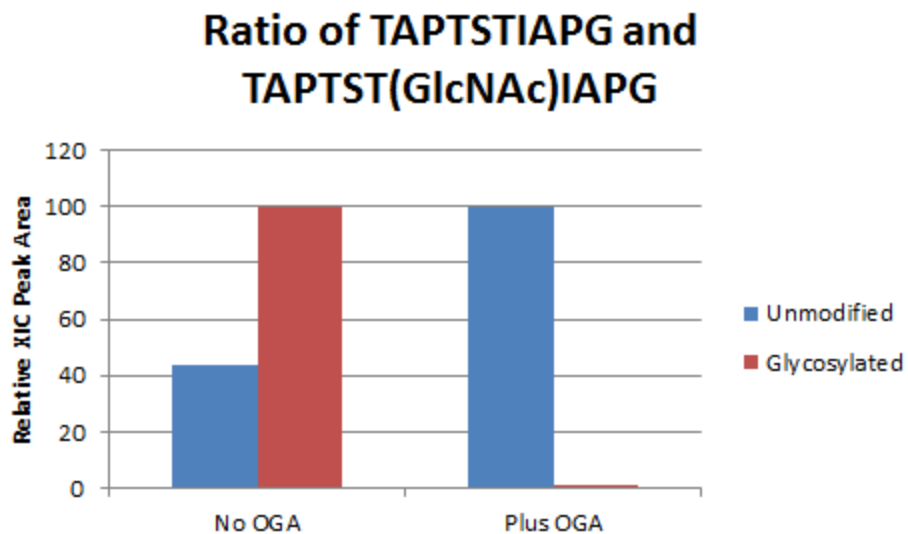

S Figure 29F

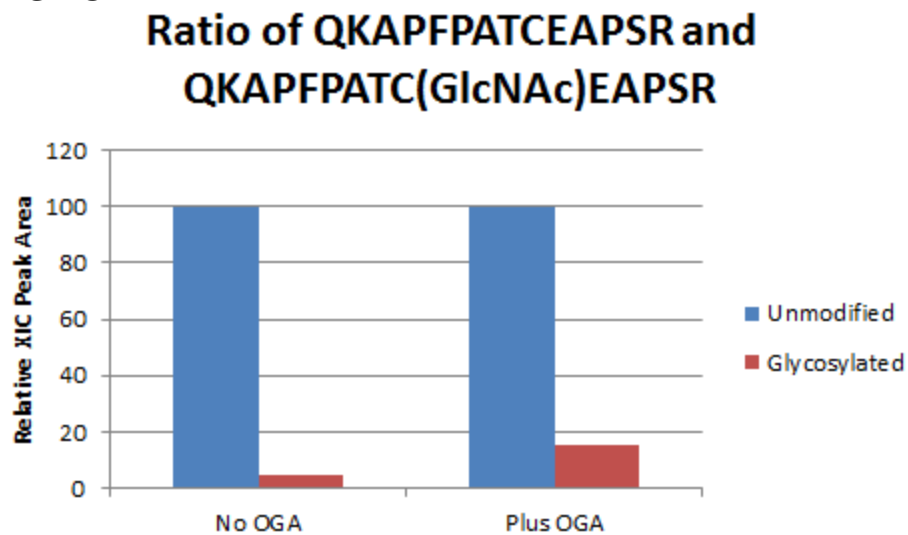

E and F) Relative XIC peak areas of modified and unmodified GlcNAc standard peptide (TAPTSTIAPG) and synthetic peptide (QKAPFPATCEAPSR) with and without incubation with OGA.
